# Supplementary material for: Distributed direct air capture of carbon dioxide by synergistic water harvesting
Source: Research Square preprint supplement (doi:10.21203/rs.3.rs-3578965/v1), 2024-10-29
Supplement: Supplementary file 1 [file 392d2b30cda5801fc8a43ef0.xlsx]

## Sheet: Fig. 1a
Desorption pressure (kPa)	Regeneration efficiency
	Desorption temperature (°C)
	85	90	95	100	105	110	115	120	125	130	135
5	0.12548	0.30756	0.46096	0.5854	0.68353	0.75936	0.8172	0.86097	0.89397	0.91883	0.93757
7.5	--	0.08939	0.27116	0.42625	0.55376	0.65566	0.73544	0.79704	0.8442	0.88014	0.90747
10	--	--	0.1148	0.28965	0.43851	0.561	0.65919	0.73643	0.79641	0.84262	0.87808
12.5	--	--	--	0.17091	0.33538	0.47421	0.58789	0.67886	0.75048	0.80623	0.84936
15	--	--	--	0.06659	0.24245	0.39429	0.52105	0.62411	0.70629	0.77092	0.8213
17.5	--	--	--	--	0.1582	0.32042	0.45824	0.57197	0.66374	0.73663	0.79387
20	--	--	--	--	0.08141	0.2519	0.3991	0.52223	0.62275	0.70331	0.76705
22.5	--	--	--	--	0.01106	0.18814	0.34328	0.47474	0.58321	0.67092	0.74082
25	--	--	--	--	--	0.12861	0.29049	0.42933	0.54506	0.63943	0.71515
27.5	--	--	--	--	--	0.0729	0.2405	0.38585	0.50821	0.60879	0.69003
30	--	--	--	--	--	0.02061	0.19305	0.34419	0.47259	0.57897	0.66545

## Sheet: Fig. 1b
Temperature (°C)	CO2 loading (mmol g-1)
	CO2 partial pressure (kPa)
	0.04	2	10
10	1.57227	2.51143	2.8481
20	1.11466	2.29786	2.71993
30	0.62926	2.09702	2.54672
40	0.30132	1.88476	2.34947
50	0.13528	1.60599	2.1441
60	0.0607	1.2365	1.9182
70	0.02799	0.83739	1.6398
80	0.01338	0.50722	1.29687
90	0.00665	0.28732	0.93073
100	0.00343	0.15877	0.611
110	0.00183	0.08792	0.3776
120	0.00101	0.04948	0.2267
130	0.000576641	0.02847	0.13536
140	0.000338214	0.01679	0.08151
150	0.000203831	0.01015	0.04986

## Sheet: Fig. 2a
Adsorption temperature (°C)	Adsorption capacity (mmol g-1)
	CO2 partial pressure (kPa)
	0.04	0.5	1	10	100
20	1.11466	1.96175	2.11893	2.71993	2.92888
30	0.62926	1.73003	1.92108	2.54672	2.86975
40	0.30132	1.38466	1.66301	2.34947	2.77819
50	0.13528	0.95271	1.29989	2.1441	2.65031
60	0.0607	0.56333	0.88224	1.9182	2.48864
70	0.02799	0.30185	0.52576	1.6398	2.29812
80	0.01338	0.15557	0.28918	1.29687	2.07789
90	0.00665	0.08015	0.15433	0.93073	1.81964
100	0.00343	0.04208	0.0825	0.611	1.51947
110	0.00183	0.02268	0.04488	0.3776	1.19434
120	0.00101	0.01258	0.02502	0.2267	0.88176
130	0.000576641	0.00719	0.01433	0.13536	0.61785
140	0.000338214	0.00422	0.00842	0.08151	0.41814
150	0.000203831	0.00255	0.00508	0.04986	0.27813

## Sheet: Fig. 2b
25 °C		35 °C		45 °C
Water vapor pressure (kPa)	Water uptake (mmol g-1)	Water vapor pressure (kPa)	Water uptake (mmol g-1)	Water vapor pressure (kPa)	Water uptake (mmol g-1)
0.1392	0.28467	0.3003	0.28979	0.568	0.27119
0.3032	0.5196	0.6176	0.53741	1.0628	0.44537
0.4695	0.76326	0.9231	0.77879	1.6395	0.65866
0.6438	0.9942	1.2726	1.01277	2.1839	0.85009
0.8296	1.23866	1.5927	1.26656	2.7793	1.05848
1.0078	1.48393	1.9018	1.52205	3.3031	1.25496
1.288	1.93174	2.1789	1.76866	3.7965	1.44848
1.6113	2.56545	2.3806	1.96786	4.2766	1.63406
1.9101	3.23996	2.6813	2.25527	4.6957	1.80879
2.1166	3.76951	3.1363	2.79455	5.1557	2.03545
2.2934	4.29406	3.5618	3.38987	5.5566	2.25683
2.4891	4.93795	3.9282	4.01496	5.9598	2.49438
2.6463	5.62545	4.2202	4.65179	6.3486	2.75246
2.792	6.30625	4.5612	5.45848	7.0582	3.24938
2.9665	7.37857	4.7581	6.02054	7.5603	3.66893
		5.0299	6.88304	7.8041	3.92121
		5.1211	7.17813	8.5521	4.72054
				8.9791	5.53929

## Sheet: Fig. 2c
35% RH		60% RH		85% RH			Relative humidity (%)	CO2 uptake (mmol g-1)
Adsorption time (min)	C/C0	Adsorption time (min)	C/C0	Adsorption time (min)	C/C0		0	0.72
0	1	0	1	0	1		35	0.77
1	0.08991	2	0.31424	1	0.20144		60	0.93
3	0.03412	3	0.03436	3	0.00622		85	1.17
4	0.00623	4	0.03436	16	0.00622
5	0.00623	5	0.00623	39	0.00622
10	0.00623	10	0.00623	64	0.00622
40	0.00623	40	0.00623	72	0.03407
50	0.08991	70	0.00623	78	0.06192
60	0.22989	80	0.09014	85	0.08978
70	0.51009	90	0.31424	100	0.20144
80	0.75915	95	0.45418	140	0.62074
90	0.86077	100	0.62176	150	0.78388
100	0.94645	105	0.73207	160	0.85874
120	1	115	0.86056	180	0.9622
140	1	135	1	200	1
160	1	170	1	210	1
180	1	220	1	220	1
220	1			250	1

## Sheet: Fig. 2d
0 min		5 min		10 min		15 min		20 min		25 min		30min
Wavenumbers (cm-1)	Absorbance	Wavenumbers (cm-1)	Absorbance	Wavenumbers (cm-1)	Absorbance	Wavenumbers (cm-1)	Absorbance	Wavenumbers (cm-1)	Absorbance	Wavenumbers (cm-1)	Absorbance	Wavenumbers (cm-1)	Absorbance
1288.24	-0.00145	1288.24	-0.0037	1288.24	-0.00501	1288.24	-0.00581	1288.24	-0.00658	1288.24	-0.00709	1288.24	-0.00774
1288.72	-0.00148	1288.72	-0.00376	1288.72	-0.00509	1288.72	-0.0059	1288.72	-0.00665	1288.72	-0.00717	1288.72	-0.00781
1289.2	-0.00151	1289.2	-0.00384	1289.2	-0.00519	1289.2	-0.006	1289.2	-0.00675	1289.2	-0.00728	1289.2	-0.00791
1289.68	-0.00154	1289.68	-0.00393	1289.68	-0.00529	1289.68	-0.00611	1289.68	-0.00686	1289.68	-0.0074	1289.68	-0.00804
1290.17	-0.00157	1290.17	-0.00402	1290.17	-0.00541	1290.17	-0.00624	1290.17	-0.00699	1290.17	-0.00754	1290.17	-0.00818
1290.65	-0.00161	1290.65	-0.00411	1290.65	-0.00554	1290.65	-0.00637	1290.65	-0.00712	1290.65	-0.00769	1290.65	-0.00833
1291.13	-0.00165	1291.13	-0.00422	1291.13	-0.00567	1291.13	-0.0065	1291.13	-0.00727	1291.13	-0.00784	1291.13	-0.00849
1291.61	-0.00169	1291.61	-0.00432	1291.61	-0.0058	1291.61	-0.00665	1291.61	-0.00743	1291.61	-0.00801	1291.61	-0.00867
1292.09	-0.00174	1292.09	-0.00443	1292.09	-0.00595	1292.09	-0.0068	1292.09	-0.00759	1292.09	-0.00817	1292.09	-0.00885
1292.58	-0.00178	1292.58	-0.00454	1292.58	-0.00609	1292.58	-0.00695	1292.58	-0.00776	1292.58	-0.00835	1292.58	-0.00903
1293.06	-0.00183	1293.06	-0.00466	1293.06	-0.00624	1293.06	-0.00711	1293.06	-0.00793	1293.06	-0.00853	1293.06	-0.00922
1293.54	-0.00187	1293.54	-0.00478	1293.54	-0.00639	1293.54	-0.00727	1293.54	-0.0081	1293.54	-0.00871	1293.54	-0.00941
1294.02	-0.00191	1294.02	-0.00491	1294.02	-0.00655	1294.02	-0.00744	1294.02	-0.00828	1294.02	-0.00889	1294.02	-0.0096
1294.51	-0.00196	1294.51	-0.00504	1294.51	-0.00671	1294.51	-0.00761	1294.51	-0.00845	1294.51	-0.00907	1294.51	-0.00979
1294.99	-0.00201	1294.99	-0.00517	1294.99	-0.00687	1294.99	-0.00778	1294.99	-0.00863	1294.99	-0.00926	1294.99	-0.00997
1295.47	-0.00206	1295.47	-0.00531	1295.47	-0.00704	1295.47	-0.00796	1295.47	-0.00882	1295.47	-0.00945	1295.47	-0.01016
1295.95	-0.00212	1295.95	-0.00546	1295.95	-0.00722	1295.95	-0.00815	1295.95	-0.00901	1295.95	-0.00965	1295.95	-0.01036
1296.43	-0.00218	1296.43	-0.00562	1296.43	-0.0074	1296.43	-0.00835	1296.43	-0.00922	1296.43	-0.00986	1296.43	-0.01057
1296.91	-0.00224	1296.91	-0.00578	1296.91	-0.00759	1296.91	-0.00856	1296.91	-0.00944	1296.91	-0.01008	1296.91	-0.0108
1297.4	-0.0023	1297.4	-0.00594	1297.4	-0.00778	1297.4	-0.00877	1297.4	-0.00966	1297.4	-0.0103	1297.4	-0.01103
1297.88	-0.00237	1297.88	-0.00611	1297.88	-0.00798	1297.88	-0.00899	1297.88	-0.00989	1297.88	-0.01053	1297.88	-0.01126
1298.36	-0.00243	1298.36	-0.00627	1298.36	-0.00817	1298.36	-0.0092	1298.36	-0.01012	1298.36	-0.01076	1298.36	-0.0115
1298.84	-0.00248	1298.84	-0.00643	1298.84	-0.00836	1298.84	-0.00941	1298.84	-0.01034	1298.84	-0.01099	1298.84	-0.01173
1299.33	-0.00254	1299.33	-0.0066	1299.33	-0.00855	1299.33	-0.00962	1299.33	-0.01056	1299.33	-0.01121	1299.33	-0.01196
1299.81	-0.00259	1299.81	-0.00675	1299.81	-0.00874	1299.81	-0.00982	1299.81	-0.01078	1299.81	-0.01144	1299.81	-0.01218
1300.29	-0.00264	1300.29	-0.00691	1300.29	-0.00893	1300.29	-0.01002	1300.29	-0.01099	1300.29	-0.01166	1300.29	-0.01241
1300.77	-0.0027	1300.77	-0.00707	1300.77	-0.00912	1300.77	-0.01022	1300.77	-0.0112	1300.77	-0.01188	1300.77	-0.01263
1301.25	-0.00275	1301.25	-0.00723	1301.25	-0.0093	1301.25	-0.01042	1301.25	-0.0114	1301.25	-0.01209	1301.25	-0.01284
1301.74	-0.00281	1301.74	-0.00739	1301.74	-0.00949	1301.74	-0.01061	1301.74	-0.0116	1301.74	-0.0123	1301.74	-0.01305
1302.22	-0.00287	1302.22	-0.00754	1302.22	-0.00967	1302.22	-0.0108	1302.22	-0.01179	1302.22	-0.01249	1302.22	-0.01325
1302.7	-0.00293	1302.7	-0.00769	1302.7	-0.00984	1302.7	-0.01098	1302.7	-0.01198	1302.7	-0.01267	1302.7	-0.01344
1303.18	-0.00299	1303.18	-0.00783	1303.18	-0.01001	1303.18	-0.01115	1303.18	-0.01215	1303.18	-0.01284	1303.18	-0.01361
1303.66	-0.00305	1303.66	-0.00797	1303.66	-0.01017	1303.66	-0.01132	1303.66	-0.01231	1303.66	-0.013	1303.66	-0.01378
1304.15	-0.00311	1304.15	-0.0081	1304.15	-0.01032	1304.15	-0.01147	1304.15	-0.01245	1304.15	-0.01315	1304.15	-0.01393
1304.63	-0.00316	1304.63	-0.00823	1304.63	-0.01046	1304.63	-0.0116	1304.63	-0.01259	1304.63	-0.01328	1304.63	-0.01406
1305.11	-0.00321	1305.11	-0.00834	1305.11	-0.01059	1305.11	-0.01173	1305.11	-0.01271	1305.11	-0.01339	1305.11	-0.01418
1305.59	-0.00326	1305.59	-0.00845	1305.59	-0.01071	1305.59	-0.01184	1305.59	-0.01282	1305.59	-0.01349	1305.59	-0.01428
1306.08	-0.00331	1306.08	-0.00856	1306.08	-0.01082	1306.08	-0.01195	1306.08	-0.01292	1306.08	-0.01358	1306.08	-0.01437
1306.56	-0.00337	1306.56	-0.00867	1306.56	-0.01093	1306.56	-0.01206	1306.56	-0.01302	1306.56	-0.01367	1306.56	-0.01446
1307.04	-0.00342	1307.04	-0.00878	1307.04	-0.01103	1307.04	-0.01216	1307.04	-0.01312	1307.04	-0.01376	1307.04	-0.01454
1307.52	-0.00348	1307.52	-0.00888	1307.52	-0.01114	1307.52	-0.01227	1307.52	-0.01322	1307.52	-0.01385	1307.52	-0.01464
1308	-0.00353	1308	-0.00899	1308	-0.01125	1308	-0.01238	1308	-0.01332	1308	-0.01395	1308	-0.01474
1308.49	-0.00358	1308.49	-0.00909	1308.49	-0.01135	1308.49	-0.01249	1308.49	-0.01342	1308.49	-0.01405	1308.49	-0.01484
1308.97	-0.00363	1308.97	-0.00919	1308.97	-0.01145	1308.97	-0.01258	1308.97	-0.0135	1308.97	-0.01414	1308.97	-0.01493
1309.45	-0.00367	1309.45	-0.00928	1309.45	-0.01154	1309.45	-0.01266	1309.45	-0.01358	1309.45	-0.01422	1309.45	-0.015
1309.93	-0.00371	1309.93	-0.00936	1309.93	-0.01161	1309.93	-0.01272	1309.93	-0.01363	1309.93	-0.01428	1309.93	-0.01504
1310.41	-0.00374	1310.41	-0.00943	1310.41	-0.01167	1310.41	-0.01276	1310.41	-0.01365	1310.41	-0.0143	1310.41	-0.01505
1310.9	-0.00378	1310.9	-0.00949	1310.9	-0.01171	1310.9	-0.01278	1310.9	-0.01365	1310.9	-0.01429	1310.9	-0.01502
1311.38	-0.00381	1311.38	-0.00955	1311.38	-0.01174	1311.38	-0.01278	1311.38	-0.01364	1311.38	-0.01425	1311.38	-0.01496
1311.86	-0.00385	1311.86	-0.00959	1311.86	-0.01176	1311.86	-0.01277	1311.86	-0.01361	1311.86	-0.01421	1311.86	-0.01489
1312.34	-0.00389	1312.34	-0.00964	1312.34	-0.01178	1312.34	-0.01276	1312.34	-0.01359	1312.34	-0.01416	1312.34	-0.01482
1312.83	-0.00393	1312.83	-0.00967	1312.83	-0.01179	1312.83	-0.01275	1312.83	-0.01356	1312.83	-0.01411	1312.83	-0.01475
1313.31	-0.00396	1313.31	-0.00971	1313.31	-0.01181	1313.31	-0.01275	1313.31	-0.01355	1313.31	-0.01407	1313.31	-0.0147
1313.79	-0.004	1313.79	-0.00974	1313.79	-0.01182	1313.79	-0.01274	1313.79	-0.01354	1313.79	-0.01404	1313.79	-0.01466
1314.27	-0.00403	1314.27	-0.00976	1314.27	-0.01183	1314.27	-0.01274	1314.27	-0.01352	1314.27	-0.01401	1314.27	-0.01463
1314.75	-0.00405	1314.75	-0.00978	1314.75	-0.01183	1314.75	-0.01271	1314.75	-0.01349	1314.75	-0.01397	1314.75	-0.01458
1315.24	-0.00407	1315.24	-0.00978	1315.24	-0.01182	1315.24	-0.01267	1315.24	-0.01344	1315.24	-0.0139	1315.24	-0.01451
1315.72	-0.00408	1315.72	-0.00976	1315.72	-0.01177	1315.72	-0.0126	1315.72	-0.01335	1315.72	-0.0138	1315.72	-0.01441
1316.2	-0.00409	1316.2	-0.00973	1316.2	-0.01171	1316.2	-0.0125	1316.2	-0.01323	1316.2	-0.01366	1316.2	-0.01426
1316.68	-0.00409	1316.68	-0.00968	1316.68	-0.01161	1316.68	-0.01237	1316.68	-0.01308	1316.68	-0.01348	1316.68	-0.01407
1317.16	-0.00409	1317.16	-0.00961	1317.16	-0.0115	1317.16	-0.01222	1317.16	-0.0129	1317.16	-0.01328	1317.16	-0.01385
1317.65	-0.00408	1317.65	-0.00953	1317.65	-0.01137	1317.65	-0.01205	1317.65	-0.0127	1317.65	-0.01306	1317.65	-0.01361
1318.13	-0.00407	1318.13	-0.00945	1318.13	-0.01123	1318.13	-0.01188	1318.13	-0.0125	1318.13	-0.01284	1318.13	-0.01337
1318.61	-0.00405	1318.61	-0.00937	1318.61	-0.01108	1318.61	-0.01171	1318.61	-0.01231	1318.61	-0.01263	1318.61	-0.01313
1319.09	-0.00404	1319.09	-0.00928	1319.09	-0.01094	1319.09	-0.01155	1319.09	-0.01213	1319.09	-0.01243	1319.09	-0.01292
1319.58	-0.00403	1319.58	-0.00919	1319.58	-0.01081	1319.58	-0.0114	1319.58	-0.01196	1319.58	-0.01226	1319.58	-0.01273
1320.06	-0.00402	1320.06	-0.00911	1320.06	-0.01067	1320.06	-0.01126	1320.06	-0.0118	1320.06	-0.01209	1320.06	-0.01255
1320.54	-0.004	1320.54	-0.00901	1320.54	-0.01054	1320.54	-0.01112	1320.54	-0.01165	1320.54	-0.01193	1320.54	-0.01239
1321.02	-0.00398	1321.02	-0.00892	1321.02	-0.01041	1321.02	-0.01097	1321.02	-0.01149	1321.02	-0.01177	1321.02	-0.01223
1321.5	-0.00397	1321.5	-0.00882	1321.5	-0.01027	1321.5	-0.01081	1321.5	-0.01132	1321.5	-0.0116	1321.5	-0.01206
1321.99	-0.00394	1321.99	-0.00871	1321.99	-0.01012	1321.99	-0.01064	1321.99	-0.01114	1321.99	-0.01141	1321.99	-0.01187
1322.47	-0.00392	1322.47	-0.00859	1322.47	-0.00997	1322.47	-0.01045	1322.47	-0.01094	1322.47	-0.01121	1322.47	-0.01166
1322.95	-0.00389	1322.95	-0.00847	1322.95	-0.0098	1322.95	-0.01026	1322.95	-0.01073	1322.95	-0.01099	1322.95	-0.01143
1323.43	-0.00386	1323.43	-0.00835	1323.43	-0.00963	1323.43	-0.01005	1323.43	-0.01051	1323.43	-0.01076	1323.43	-0.01119
1323.91	-0.00383	1323.91	-0.00821	1323.91	-0.00945	1323.91	-0.00984	1323.91	-0.01028	1323.91	-0.01052	1323.91	-0.01094
1324.4	-0.0038	1324.4	-0.00808	1324.4	-0.00928	1324.4	-0.00963	1324.4	-0.01005	1324.4	-0.01029	1324.4	-0.01069
1324.88	-0.00376	1324.88	-0.00794	1324.88	-0.0091	1324.88	-0.00943	1324.88	-0.00982	1324.88	-0.01006	1324.88	-0.01044
1325.36	-0.00372	1325.36	-0.00781	1325.36	-0.00893	1325.36	-0.00923	1325.36	-0.0096	1325.36	-0.00984	1325.36	-0.0102
1325.84	-0.00367	1325.84	-0.00768	1325.84	-0.00876	1325.84	-0.00903	1325.84	-0.00938	1325.84	-0.00962	1325.84	-0.00997
1326.33	-0.00362	1326.33	-0.00755	1326.33	-0.0086	1326.33	-0.00884	1326.33	-0.00917	1326.33	-0.00941	1326.33	-0.00974
1326.81	-0.00358	1326.81	-0.00743	1326.81	-0.00844	1326.81	-0.00866	1326.81	-0.00898	1326.81	-0.0092	1326.81	-0.00953
1327.29	-0.00353	1327.29	-0.00731	1327.29	-0.00829	1327.29	-0.00849	1327.29	-0.00879	1327.29	-0.00901	1327.29	-0.00932
1327.77	-0.00349	1327.77	-0.00721	1327.77	-0.00815	1327.77	-0.00833	1327.77	-0.00862	1327.77	-0.00882	1327.77	-0.00912
1328.25	-0.00344	1328.25	-0.0071	1328.25	-0.00801	1328.25	-0.00818	1328.25	-0.00846	1328.25	-0.00865	1328.25	-0.00894
1328.73	-0.0034	1328.73	-0.00701	1328.73	-0.00789	1328.73	-0.00805	1328.73	-0.00832	1328.73	-0.0085	1328.73	-0.00877
1329.22	-0.00336	1329.22	-0.00692	1329.22	-0.00777	1329.22	-0.00793	1329.22	-0.00819	1329.22	-0.00835	1329.22	-0.00862
1329.7	-0.00332	1329.7	-0.00683	1329.7	-0.00765	1329.7	-0.00781	1329.7	-0.00807	1329.7	-0.00822	1329.7	-0.00848
1330.18	-0.00328	1330.18	-0.00674	1330.18	-0.00755	1330.18	-0.00771	1330.18	-0.00795	1330.18	-0.0081	1330.18	-0.00836
1330.66	-0.00324	1330.66	-0.00665	1330.66	-0.00745	1330.66	-0.00761	1330.66	-0.00785	1330.66	-0.00798	1330.66	-0.00824
1331.15	-0.00319	1331.15	-0.00656	1331.15	-0.00735	1331.15	-0.00752	1331.15	-0.00775	1331.15	-0.00788	1331.15	-0.00814
1331.63	-0.00315	1331.63	-0.00647	1331.63	-0.00726	1331.63	-0.00742	1331.63	-0.00766	1331.63	-0.00779	1331.63	-0.00804
1332.11	-0.00311	1332.11	-0.00638	1332.11	-0.00717	1332.11	-0.00734	1332.11	-0.00756	1332.11	-0.0077	1332.11	-0.00795
1332.59	-0.00306	1332.59	-0.0063	1332.59	-0.00708	1332.59	-0.00725	1332.59	-0.00747	1332.59	-0.00761	1332.59	-0.00787
1333.08	-0.00302	1333.08	-0.00621	1333.08	-0.007	1333.08	-0.00716	1333.08	-0.00738	1333.08	-0.00751	1333.08	-0.00778
1333.56	-0.00297	1333.56	-0.00613	1333.56	-0.00691	1333.56	-0.00706	1333.56	-0.00727	1333.56	-0.0074	1333.56	-0.00767
1334.04	-0.00293	1334.04	-0.00605	1334.04	-0.00681	1334.04	-0.00695	1334.04	-0.00716	1334.04	-0.00728	1334.04	-0.00755
1334.52	-0.00289	1334.52	-0.00596	1334.52	-0.00671	1334.52	-0.00683	1334.52	-0.00702	1334.52	-0.00714	1334.52	-0.00741
1335	-0.00284	1335	-0.00588	1335	-0.00661	1335	-0.00669	1335	-0.00688	1335	-0.00698	1335	-0.00723
1335.48	-0.00279	1335.48	-0.00579	1335.48	-0.00649	1335.48	-0.00654	1335.48	-0.00671	1335.48	-0.00679	1335.48	-0.00703
1335.97	-0.00275	1335.97	-0.0057	1335.97	-0.00636	1335.97	-0.00637	1335.97	-0.00652	1335.97	-0.00658	1335.97	-0.0068
1336.45	-0.0027	1336.45	-0.0056	1336.45	-0.00622	1336.45	-0.00619	1336.45	-0.00632	1336.45	-0.00634	1336.45	-0.00653
1336.93	-0.00265	1336.93	-0.00549	1336.93	-0.00607	1336.93	-0.00599	1336.93	-0.00609	1336.93	-0.00608	1336.93	-0.00623
1337.41	-0.0026	1337.41	-0.00538	1337.41	-0.00592	1337.41	-0.00578	1337.41	-0.00586	1337.41	-0.0058	1337.41	-0.00591
1337.9	-0.00255	1337.9	-0.00527	1337.9	-0.00576	1337.9	-0.00558	1337.9	-0.00563	1337.9	-0.00552	1337.9	-0.00559
1338.38	-0.00251	1338.38	-0.00517	1338.38	-0.00562	1338.38	-0.00541	1338.38	-0.00544	1338.38	-0.00528	1338.38	-0.00532
1338.86	-0.00247	1338.86	-0.00508	1338.86	-0.00551	1338.86	-0.00529	1338.86	-0.00531	1338.86	-0.00512	1338.86	-0.00513
1339.34	-0.00244	1339.34	-0.00503	1339.34	-0.00545	1339.34	-0.00525	1339.34	-0.00527	1339.34	-0.00507	1339.34	-0.00507
1339.82	-0.00243	1339.82	-0.005	1339.82	-0.00544	1339.82	-0.0053	1339.82	-0.00533	1339.82	-0.00514	1339.82	-0.00516
1340.31	-0.00242	1340.31	-0.00501	1340.31	-0.00549	1340.31	-0.00541	1340.31	-0.00548	1340.31	-0.00533	1340.31	-0.00538
1340.79	-0.00241	1340.79	-0.00504	1340.79	-0.00557	1340.79	-0.00557	1340.79	-0.00569	1340.79	-0.0056	1340.79	-0.00569
1341.27	-0.00241	1341.27	-0.00508	1341.27	-0.00568	1341.27	-0.00575	1341.27	-0.00591	1341.27	-0.00589	1341.27	-0.00604
1341.75	-0.0024	1341.75	-0.00511	1341.75	-0.00578	1341.75	-0.00591	1341.75	-0.00612	1341.75	-0.00616	1341.75	-0.00637
1342.23	-0.00239	1342.23	-0.00513	1342.23	-0.00587	1342.23	-0.00604	1342.23	-0.00629	1342.23	-0.00639	1342.23	-0.00665
1342.72	-0.00238	1342.72	-0.00514	1342.72	-0.00593	1342.72	-0.00614	1342.72	-0.00641	1342.72	-0.00658	1342.72	-0.00687
1343.2	-0.00236	1343.2	-0.00514	1343.2	-0.00597	1343.2	-0.0062	1343.2	-0.0065	1343.2	-0.00671	1343.2	-0.00704
1343.68	-0.00234	1343.68	-0.00514	1343.68	-0.00599	1343.68	-0.00625	1343.68	-0.00657	1343.68	-0.00681	1343.68	-0.00716
1344.16	-0.00232	1344.16	-0.00513	1344.16	-0.00601	1344.16	-0.00629	1344.16	-0.00662	1344.16	-0.00689	1344.16	-0.00725
1344.65	-0.0023	1344.65	-0.00512	1344.65	-0.00601	1344.65	-0.00632	1344.65	-0.00666	1344.65	-0.00696	1344.65	-0.00734
1345.13	-0.00228	1345.13	-0.00511	1345.13	-0.00602	1345.13	-0.00636	1345.13	-0.00671	1345.13	-0.00703	1345.13	-0.00742
1345.61	-0.00227	1345.61	-0.0051	1345.61	-0.00603	1345.61	-0.00639	1345.61	-0.00676	1345.61	-0.0071	1345.61	-0.0075
1346.09	-0.00225	1346.09	-0.00509	1346.09	-0.00604	1346.09	-0.00643	1346.09	-0.00682	1346.09	-0.00717	1346.09	-0.00759
1346.57	-0.00224	1346.57	-0.00507	1346.57	-0.00606	1346.57	-0.00646	1346.57	-0.00688	1346.57	-0.00724	1346.57	-0.00768
1347.06	-0.00222	1347.06	-0.00506	1347.06	-0.00607	1347.06	-0.0065	1347.06	-0.00695	1347.06	-0.00731	1347.06	-0.00778
1347.54	-0.00221	1347.54	-0.00505	1347.54	-0.00609	1347.54	-0.00655	1347.54	-0.00703	1347.54	-0.00739	1347.54	-0.00789
1348.02	-0.0022	1348.02	-0.00504	1348.02	-0.00611	1348.02	-0.0066	1348.02	-0.00711	1348.02	-0.00749	1348.02	-0.00802
1348.5	-0.00219	1348.5	-0.00503	1348.5	-0.00614	1348.5	-0.00666	1348.5	-0.00721	1348.5	-0.0076	1348.5	-0.00816
1348.98	-0.00219	1348.98	-0.00502	1348.98	-0.00618	1348.98	-0.00674	1348.98	-0.00732	1348.98	-0.00774	1348.98	-0.00832
1349.47	-0.00218	1349.47	-0.00502	1349.47	-0.00622	1349.47	-0.00683	1349.47	-0.00745	1349.47	-0.0079	1349.47	-0.00851
1349.95	-0.00217	1349.95	-0.00502	1349.95	-0.00627	1349.95	-0.00694	1349.95	-0.00759	1349.95	-0.00808	1349.95	-0.00871
1350.43	-0.00215	1350.43	-0.00503	1350.43	-0.00633	1350.43	-0.00705	1350.43	-0.00774	1350.43	-0.00828	1350.43	-0.00893
1350.91	-0.00213	1350.91	-0.00503	1350.91	-0.00639	1350.91	-0.00716	1350.91	-0.0079	1350.91	-0.00848	1350.91	-0.00915
1351.39	-0.00211	1351.39	-0.00503	1351.39	-0.00645	1351.39	-0.00727	1351.39	-0.00806	1351.39	-0.00868	1351.39	-0.00937
1351.88	-0.00209	1351.88	-0.00503	1351.88	-0.0065	1351.88	-0.00737	1351.88	-0.00821	1351.88	-0.00887	1351.88	-0.00958
1352.36	-0.00207	1352.36	-0.00503	1352.36	-0.00656	1352.36	-0.00747	1352.36	-0.00835	1352.36	-0.00904	1352.36	-0.00978
1352.84	-0.00205	1352.84	-0.00503	1352.84	-0.00661	1352.84	-0.00757	1352.84	-0.00849	1352.84	-0.00921	1352.84	-0.00997
1353.32	-0.00203	1353.32	-0.00504	1353.32	-0.00666	1353.32	-0.00767	1353.32	-0.00863	1353.32	-0.00937	1353.32	-0.01015
1353.81	-0.00202	1353.81	-0.00504	1353.81	-0.00673	1353.81	-0.00778	1353.81	-0.00879	1353.81	-0.00954	1353.81	-0.01035
1354.29	-0.00201	1354.29	-0.00506	1354.29	-0.0068	1354.29	-0.00791	1354.29	-0.00896	1354.29	-0.00974	1354.29	-0.01057
1354.77	-0.002	1354.77	-0.00508	1354.77	-0.00689	1354.77	-0.00805	1354.77	-0.00915	1354.77	-0.00996	1354.77	-0.01083
1355.25	-0.00201	1355.25	-0.00511	1355.25	-0.00699	1355.25	-0.00821	1355.25	-0.00936	1355.25	-0.0102	1355.25	-0.01111
1355.73	-0.00201	1355.73	-0.00516	1355.73	-0.0071	1355.73	-0.00839	1355.73	-0.00959	1355.73	-0.01047	1355.73	-0.01141
1356.22	-0.00202	1356.22	-0.00521	1356.22	-0.00722	1356.22	-0.00857	1356.22	-0.00983	1356.22	-0.01075	1356.22	-0.01173
1356.7	-0.00203	1356.7	-0.00527	1356.7	-0.00735	1356.7	-0.00876	1356.7	-0.01007	1356.7	-0.01103	1356.7	-0.01205
1357.18	-0.00204	1357.18	-0.00532	1357.18	-0.00747	1357.18	-0.00894	1357.18	-0.0103	1357.18	-0.0113	1357.18	-0.01236
1357.66	-0.00204	1357.66	-0.00538	1357.66	-0.00758	1357.66	-0.00911	1357.66	-0.01051	1357.66	-0.01156	1357.66	-0.01265
1358.14	-0.00204	1358.14	-0.00542	1358.14	-0.00769	1358.14	-0.00927	1358.14	-0.01072	1358.14	-0.01181	1358.14	-0.01293
1358.63	-0.00203	1358.63	-0.00547	1358.63	-0.0078	1358.63	-0.00942	1358.63	-0.01091	1358.63	-0.01203	1358.63	-0.01318
1359.11	-0.00203	1359.11	-0.00551	1359.11	-0.00789	1359.11	-0.00955	1359.11	-0.01108	1359.11	-0.01224	1359.11	-0.01341
1359.59	-0.00202	1359.59	-0.00555	1359.59	-0.00799	1359.59	-0.00968	1359.59	-0.01125	1359.59	-0.01243	1359.59	-0.01362
1360.07	-0.00201	1360.07	-0.0056	1360.07	-0.00809	1360.07	-0.00981	1360.07	-0.01141	1360.07	-0.01261	1360.07	-0.01381
1360.56	-0.00201	1360.56	-0.00566	1360.56	-0.0082	1360.56	-0.00996	1360.56	-0.01159	1360.56	-0.01279	1360.56	-0.01401
1361.04	-0.00202	1361.04	-0.00574	1361.04	-0.00833	1361.04	-0.01014	1361.04	-0.01181	1361.04	-0.01302	1361.04	-0.01425
1361.52	-0.00203	1361.52	-0.00586	1361.52	-0.00852	1361.52	-0.0104	1361.52	-0.01211	1361.52	-0.01333	1361.52	-0.01458
1362	-0.00206	1362	-0.00601	1362	-0.00877	1362	-0.01076	1362	-0.01252	1362	-0.01377	1362	-0.01505
1362.48	-0.0021	1362.48	-0.00622	1362.48	-0.00911	1362.48	-0.01123	1362.48	-0.01307	1362.48	-0.01436	1362.48	-0.0157
1362.97	-0.00215	1362.97	-0.00647	1362.97	-0.00952	1362.97	-0.0118	1362.97	-0.01373	1362.97	-0.0151	1362.97	-0.01651
1363.45	-0.0022	1363.45	-0.00675	1363.45	-0.00997	1363.45	-0.01243	1363.45	-0.01447	1363.45	-0.01594	1363.45	-0.01743
1363.93	-0.00226	1363.93	-0.00705	1363.93	-0.01045	1363.93	-0.01308	1363.93	-0.01522	1363.93	-0.01681	1363.93	-0.01839
1364.41	-0.00232	1364.41	-0.00733	1364.41	-0.01091	1364.41	-0.01369	1364.41	-0.01594	1364.41	-0.01764	1364.41	-0.01933
1364.89	-0.00237	1364.89	-0.0076	1364.89	-0.01135	1364.89	-0.01425	1364.89	-0.0166	1364.89	-0.01841	1364.89	-0.02019
1365.38	-0.00242	1365.38	-0.00785	1365.38	-0.01176	1365.38	-0.01475	1365.38	-0.0172	1365.38	-0.01911	1365.38	-0.02097
1365.86	-0.00247	1365.86	-0.00809	1365.86	-0.01214	1365.86	-0.01522	1365.86	-0.01775	1365.86	-0.01974	1365.86	-0.02167
1366.34	-0.00252	1366.34	-0.00833	1366.34	-0.0125	1366.34	-0.01566	1366.34	-0.01826	1366.34	-0.02032	1366.34	-0.02231
1366.82	-0.00257	1366.82	-0.00858	1366.82	-0.01287	1366.82	-0.01609	1366.82	-0.01876	1366.82	-0.02088	1366.82	-0.02292
1367.31	-0.00263	1367.31	-0.00883	1367.31	-0.01324	1367.31	-0.01654	1367.31	-0.01927	1367.31	-0.02144	1367.31	-0.02352
1367.79	-0.0027	1367.79	-0.00911	1367.79	-0.01363	1367.79	-0.01701	1367.79	-0.01981	1367.79	-0.02202	1367.79	-0.02414
1368.27	-0.00277	1368.27	-0.00941	1368.27	-0.01405	1368.27	-0.0175	1368.27	-0.02037	1368.27	-0.02263	1368.27	-0.02479
1368.75	-0.00284	1368.75	-0.00971	1368.75	-0.01447	1368.75	-0.01801	1368.75	-0.02095	1368.75	-0.02326	1368.75	-0.02546
1369.23	-0.00292	1369.23	-0.01002	1369.23	-0.0149	1369.23	-0.01852	1369.23	-0.02152	1369.23	-0.02389	1369.23	-0.02613
1369.72	-0.003	1369.72	-0.01031	1369.72	-0.01531	1369.72	-0.019	1369.72	-0.02207	1369.72	-0.02448	1369.72	-0.02677
1370.2	-0.00306	1370.2	-0.01058	1370.2	-0.01567	1370.2	-0.01942	1370.2	-0.02254	1370.2	-0.025	1370.2	-0.02733
1370.68	-0.00313	1370.68	-0.01081	1370.68	-0.01599	1370.68	-0.01977	1370.68	-0.02293	1370.68	-0.02542	1370.68	-0.02778
1371.16	-0.00318	1371.16	-0.01101	1371.16	-0.01624	1371.16	-0.02003	1371.16	-0.02321	1371.16	-0.02572	1371.16	-0.02809
1371.64	-0.00324	1371.64	-0.01117	1371.64	-0.01643	1371.64	-0.02021	1371.64	-0.0234	1371.64	-0.0259	1371.64	-0.02828
1372.13	-0.00328	1372.13	-0.01131	1372.13	-0.01657	1372.13	-0.02033	1372.13	-0.0235	1372.13	-0.02598	1372.13	-0.02835
1372.61	-0.00333	1372.61	-0.01143	1372.61	-0.01669	1372.61	-0.02042	1372.61	-0.02356	1372.61	-0.02601	1372.61	-0.02836
1373.09	-0.00338	1373.09	-0.01154	1373.09	-0.01679	1373.09	-0.02051	1373.09	-0.02362	1373.09	-0.02602	1373.09	-0.02834
1373.57	-0.00342	1373.57	-0.01167	1373.57	-0.01691	1373.57	-0.02063	1373.57	-0.0237	1373.57	-0.02607	1373.57	-0.02837
1374.06	-0.00347	1374.06	-0.0118	1374.06	-0.01706	1374.06	-0.0208	1374.06	-0.02385	1374.06	-0.02619	1374.06	-0.02847
1374.54	-0.00352	1374.54	-0.01195	1374.54	-0.01723	1374.54	-0.02101	1374.54	-0.02405	1374.54	-0.02638	1374.54	-0.02865
1375.02	-0.00356	1375.02	-0.0121	1375.02	-0.01741	1375.02	-0.02124	1375.02	-0.02427	1375.02	-0.02661	1375.02	-0.02889
1375.5	-0.0036	1375.5	-0.01223	1375.5	-0.01758	1375.5	-0.02145	1375.5	-0.02449	1375.5	-0.02685	1375.5	-0.02914
1375.98	-0.00362	1375.98	-0.01235	1375.98	-0.01774	1375.98	-0.02162	1375.98	-0.02467	1375.98	-0.02706	1375.98	-0.02935
1376.47	-0.00364	1376.47	-0.01245	1376.47	-0.01786	1376.47	-0.02174	1376.47	-0.02479	1376.47	-0.0272	1376.47	-0.02951
1376.95	-0.00366	1376.95	-0.01253	1376.95	-0.01795	1376.95	-0.02181	1376.95	-0.02486	1376.95	-0.02728	1376.95	-0.02959
1377.43	-0.00367	1377.43	-0.01259	1377.43	-0.01802	1377.43	-0.02184	1377.43	-0.02489	1377.43	-0.0273	1377.43	-0.02961
1377.91	-0.00368	1377.91	-0.01265	1377.91	-0.01806	1377.91	-0.02184	1377.91	-0.02488	1377.91	-0.02728	1377.91	-0.02957
1378.39	-0.0037	1378.39	-0.01271	1378.39	-0.01809	1378.39	-0.02183	1378.39	-0.02485	1378.39	-0.02723	1378.39	-0.02951
1378.88	-0.00371	1378.88	-0.01277	1378.88	-0.01813	1378.88	-0.02183	1378.88	-0.02482	1378.88	-0.02717	1378.88	-0.02944
1379.36	-0.00374	1379.36	-0.01284	1379.36	-0.01817	1379.36	-0.02183	1379.36	-0.0248	1379.36	-0.02713	1379.36	-0.02938
1379.84	-0.00377	1379.84	-0.01293	1379.84	-0.01824	1379.84	-0.02186	1379.84	-0.02482	1379.84	-0.02712	1379.84	-0.02936
1380.32	-0.0038	1380.32	-0.01304	1380.32	-0.01832	1380.32	-0.02192	1380.32	-0.02486	1380.32	-0.02715	1380.32	-0.02937
1380.81	-0.00385	1380.81	-0.01316	1380.81	-0.01843	1380.81	-0.02199	1380.81	-0.02492	1380.81	-0.02719	1380.81	-0.0294
1381.29	-0.00389	1381.29	-0.01328	1381.29	-0.01853	1381.29	-0.02207	1381.29	-0.02497	1381.29	-0.02723	1381.29	-0.02944
1381.77	-0.00394	1381.77	-0.01339	1381.77	-0.01862	1381.77	-0.02213	1381.77	-0.02501	1381.77	-0.02725	1381.77	-0.02943
1382.25	-0.00398	1382.25	-0.01348	1382.25	-0.01867	1382.25	-0.02214	1382.25	-0.02498	1382.25	-0.0272	1382.25	-0.02936
1382.73	-0.004	1382.73	-0.01354	1382.73	-0.01867	1382.73	-0.02207	1382.73	-0.02487	1382.73	-0.02707	1382.73	-0.02919
1383.22	-0.00402	1383.22	-0.01356	1383.22	-0.0186	1383.22	-0.02193	1383.22	-0.02467	1383.22	-0.02682	1383.22	-0.02891
1383.7	-0.00402	1383.7	-0.01353	1383.7	-0.01846	1383.7	-0.02168	1383.7	-0.02435	1383.7	-0.02646	1383.7	-0.02849
1384.18	-0.00401	1384.18	-0.01345	1384.18	-0.01824	1384.18	-0.02134	1384.18	-0.02393	1384.18	-0.02597	1384.18	-0.02794
1384.66	-0.00398	1384.66	-0.01331	1384.66	-0.01795	1384.66	-0.0209	1384.66	-0.0234	1384.66	-0.02534	1384.66	-0.02725
1385.14	-0.00394	1385.14	-0.01313	1385.14	-0.01757	1385.14	-0.02035	1385.14	-0.02274	1385.14	-0.02458	1385.14	-0.0264
1385.63	-0.00389	1385.63	-0.01289	1385.63	-0.01711	1385.63	-0.01972	1385.63	-0.02197	1385.63	-0.02367	1385.63	-0.02539
1386.11	-0.00383	1386.11	-0.01261	1386.11	-0.01659	1386.11	-0.01902	1386.11	-0.0211	1386.11	-0.02266	1386.11	-0.02427
1386.59	-0.00378	1386.59	-0.01231	1386.59	-0.01603	1386.59	-0.01828	1386.59	-0.02019	1386.59	-0.02159	1386.59	-0.02308
1387.07	-0.00373	1387.07	-0.01202	1387.07	-0.01548	1387.07	-0.01757	1387.07	-0.0193	1387.07	-0.02056	1387.07	-0.02193
1387.56	-0.00369	1387.56	-0.01175	1387.56	-0.01499	1387.56	-0.01692	1387.56	-0.01849	1387.56	-0.01962	1387.56	-0.02089
1388.04	-0.00366	1388.04	-0.01152	1388.04	-0.01458	1388.04	-0.01637	1388.04	-0.0178	1388.04	-0.01884	1388.04	-0.02002
1388.52	-0.00364	1388.52	-0.01133	1388.52	-0.01424	1388.52	-0.01591	1388.52	-0.01722	1388.52	-0.01818	1388.52	-0.0193
1389	-0.00362	1389	-0.01117	1389	-0.01395	1389	-0.0155	1389	-0.01673	1389	-0.01763	1389	-0.01869
1389.48	-0.0036	1389.48	-0.01102	1389.48	-0.01368	1389.48	-0.01511	1389.48	-0.01627	1389.48	-0.01712	1389.48	-0.01813
1389.96	-0.00358	1389.96	-0.01086	1389.96	-0.01341	1389.96	-0.01472	1389.96	-0.01581	1389.96	-0.01661	1389.96	-0.01757
1390.45	-0.00355	1390.45	-0.01069	1390.45	-0.01313	1390.45	-0.01431	1390.45	-0.01534	1390.45	-0.01609	1390.45	-0.017
1390.93	-0.00351	1390.93	-0.01051	1390.93	-0.01283	1390.93	-0.01388	1390.93	-0.01484	1390.93	-0.01555	1390.93	-0.0164
1391.41	-0.00347	1391.41	-0.01031	1391.41	-0.01251	1391.41	-0.01344	1391.41	-0.01433	1391.41	-0.01497	1391.41	-0.01577
1391.89	-0.00342	1391.89	-0.01009	1391.89	-0.01216	1391.89	-0.01297	1391.89	-0.01378	1391.89	-0.01437	1391.89	-0.0151
1392.38	-0.00335	1392.38	-0.00985	1392.38	-0.01179	1392.38	-0.01247	1392.38	-0.01321	1392.38	-0.01372	1392.38	-0.01438
1392.86	-0.00328	1392.86	-0.00957	1392.86	-0.01137	1392.86	-0.01194	1392.86	-0.0126	1392.86	-0.01304	1392.86	-0.01362
1393.34	-0.00319	1393.34	-0.00926	1393.34	-0.01091	1393.34	-0.01138	1393.34	-0.01195	1393.34	-0.01231	1393.34	-0.01281
1393.82	-0.00308	1393.82	-0.0089	1393.82	-0.01042	1393.82	-0.0108	1393.82	-0.01128	1393.82	-0.01155	1393.82	-0.01198
1394.3	-0.00296	1394.3	-0.00851	1394.3	-0.0099	1394.3	-0.01022	1394.3	-0.01063	1394.3	-0.01082	1394.3	-0.01117
1394.79	-0.00284	1394.79	-0.00811	1394.79	-0.0094	1394.79	-0.00969	1394.79	-0.01004	1394.79	-0.01017	1394.79	-0.01047
1395.27	-0.00273	1395.27	-0.00774	1395.27	-0.00895	1395.27	-0.00922	1395.27	-0.00955	1395.27	-0.00963	1395.27	-0.00989
1395.75	-0.00262	1395.75	-0.00741	1395.75	-0.00856	1395.75	-0.00883	1395.75	-0.00914	1395.75	-0.0092	1395.75	-0.00946
1396.23	-0.00252	1396.23	-0.00711	1396.23	-0.00823	1396.23	-0.0085	1396.23	-0.00881	1396.23	-0.00886	1396.23	-0.00912
1396.71	-0.00243	1396.71	-0.00683	1396.71	-0.00792	1396.71	-0.00819	1396.71	-0.0085	1396.71	-0.00855	1396.71	-0.00884
1397.2	-0.00233	1397.2	-0.00655	1397.2	-0.00761	1397.2	-0.00789	1397.2	-0.0082	1397.2	-0.00826	1397.2	-0.00856
1397.68	-0.00223	1397.68	-0.00627	1397.68	-0.0073	1397.68	-0.00758	1397.68	-0.00789	1397.68	-0.00795	1397.68	-0.00827
1398.16	-0.00213	1398.16	-0.00598	1398.16	-0.00698	1398.16	-0.00728	1398.16	-0.00758	1398.16	-0.00766	1398.16	-0.00798
1398.64	-0.00202	1398.64	-0.00568	1398.64	-0.00666	1398.64	-0.007	1398.64	-0.0073	1398.64	-0.0074	1398.64	-0.00774
1399.13	-0.00192	1399.13	-0.0054	1399.13	-0.00638	1399.13	-0.00677	1399.13	-0.00709	1399.13	-0.00722	1399.13	-0.00758
1399.61	-0.00182	1399.61	-0.00515	1399.61	-0.00615	1399.61	-0.0066	1399.61	-0.00694	1399.61	-0.00712	1399.61	-0.00751
1400.09	-0.00174	1400.09	-0.00494	1400.09	-0.00597	1400.09	-0.00647	1400.09	-0.00685	1400.09	-0.00708	1400.09	-0.00751
1400.57	-0.00167	1400.57	-0.00475	1400.57	-0.00582	1400.57	-0.00635	1400.57	-0.00678	1400.57	-0.00707	1400.57	-0.00752
1401.05	-0.0016	1401.05	-0.00458	1401.05	-0.00568	1401.05	-0.00622	1401.05	-0.0067	1401.05	-0.00702	1401.05	-0.00751
1401.54	-0.00154	1401.54	-0.00442	1401.54	-0.00553	1401.54	-0.00605	1401.54	-0.00656	1401.54	-0.00692	1401.54	-0.00743
1402.02	-0.00148	1402.02	-0.00425	1402.02	-0.00535	1402.02	-0.00584	1402.02	-0.00638	1402.02	-0.00675	1402.02	-0.00728
1402.5	-0.00141	1402.5	-0.00406	1402.5	-0.00514	1402.5	-0.0056	1402.5	-0.00614	1402.5	-0.0065	1402.5	-0.00704
1402.98	-0.00135	1402.98	-0.00387	1402.98	-0.00492	1402.98	-0.00533	1402.98	-0.00587	1402.98	-0.00621	1402.98	-0.00674
1403.46	-0.00128	1403.46	-0.00368	1403.46	-0.00468	1403.46	-0.00507	1403.46	-0.00559	1403.46	-0.0059	1403.46	-0.00642
1403.95	-0.00122	1403.95	-0.00349	1403.95	-0.00445	1403.95	-0.00483	1403.95	-0.00532	1403.95	-0.00561	1403.95	-0.00611
1404.43	-0.00117	1404.43	-0.00332	1404.43	-0.00425	1404.43	-0.00463	1404.43	-0.00511	1404.43	-0.00537	1404.43	-0.00585
1404.91	-0.00112	1404.91	-0.00317	1404.91	-0.00408	1404.91	-0.00449	1404.91	-0.00496	1404.91	-0.0052	1404.91	-0.00568
1405.39	-0.00108	1405.39	-0.00306	1405.39	-0.00396	1405.39	-0.0044	1405.39	-0.00488	1405.39	-0.00512	1405.39	-0.0056
1405.88	-0.00106	1405.88	-0.00296	1405.88	-0.00388	1405.88	-0.00435	1405.88	-0.00485	1405.88	-0.00511	1405.88	-0.0056
1406.36	-0.00104	1406.36	-0.0029	1406.36	-0.00383	1406.36	-0.00434	1406.36	-0.00485	1406.36	-0.00515	1406.36	-0.00564
1406.84	-0.00103	1406.84	-0.00285	1406.84	-0.0038	1406.84	-0.00433	1406.84	-0.00487	1406.84	-0.00519	1406.84	-0.0057
1407.32	-0.00102	1407.32	-0.00281	1407.32	-0.00377	1407.32	-0.00431	1407.32	-0.00487	1407.32	-0.00523	1407.32	-0.00575
1407.8	-0.00101	1407.8	-0.00278	1407.8	-0.00375	1407.8	-0.00429	1407.8	-0.00486	1407.8	-0.00523	1407.8	-0.00576
1408.29	-0.00099845	1408.29	-0.00274	1408.29	-0.00373	1408.29	-0.00425	1408.29	-0.00482	1408.29	-0.00521	1408.29	-0.00574
1408.77	-0.000989535	1408.77	-0.00271	1408.77	-0.00369	1408.77	-0.00419	1408.77	-0.00477	1408.77	-0.00516	1408.77	-0.00569
1409.25	-0.000981907	1409.25	-0.00268	1409.25	-0.00365	1409.25	-0.00414	1409.25	-0.0047	1409.25	-0.00508	1409.25	-0.00561
1409.73	-0.000978382	1409.73	-0.00267	1409.73	-0.00362	1409.73	-0.00409	1409.73	-0.00465	1409.73	-0.00502	1409.73	-0.00553
1410.21	-0.000982246	1410.21	-0.00267	1410.21	-0.00361	1410.21	-0.00408	1410.21	-0.00462	1410.21	-0.00498	1410.21	-0.00549
1410.7	-0.000996687	1410.7	-0.0027	1410.7	-0.00364	1410.7	-0.00411	1410.7	-0.00465	1410.7	-0.00499	1410.7	-0.00549
1411.18	-0.00102	1411.18	-0.00276	1411.18	-0.00372	1411.18	-0.0042	1411.18	-0.00473	1411.18	-0.00507	1411.18	-0.00557
1411.66	-0.00106	1411.66	-0.00286	1411.66	-0.00384	1411.66	-0.00434	1411.66	-0.00488	1411.66	-0.00522	1411.66	-0.00572
1412.14	-0.00111	1412.14	-0.003	1412.14	-0.00401	1412.14	-0.00453	1412.14	-0.00508	1412.14	-0.00543	1412.14	-0.00593
1412.62	-0.00117	1412.62	-0.00316	1412.62	-0.00421	1412.62	-0.00475	1412.62	-0.00531	1412.62	-0.00567	1412.62	-0.00617
1413.11	-0.00124	1413.11	-0.00335	1413.11	-0.00444	1413.11	-0.00498	1413.11	-0.00556	1413.11	-0.00593	1413.11	-0.00644
1413.59	-0.00131	1413.59	-0.00355	1413.59	-0.00468	1413.59	-0.00523	1413.59	-0.00581	1413.59	-0.00619	1413.59	-0.0067
1414.07	-0.00139	1414.07	-0.00378	1414.07	-0.00494	1414.07	-0.00548	1414.07	-0.00606	1414.07	-0.00645	1414.07	-0.00694
1414.55	-0.00148	1414.55	-0.00402	1414.55	-0.00521	1414.55	-0.00573	1414.55	-0.0063	1414.55	-0.00668	1414.55	-0.00716
1415.04	-0.00157	1415.04	-0.00429	1415.04	-0.0055	1415.04	-0.00599	1415.04	-0.00654	1415.04	-0.0069	1415.04	-0.00735
1415.52	-0.00166	1415.52	-0.00457	1415.52	-0.0058	1415.52	-0.00624	1415.52	-0.00677	1415.52	-0.0071	1415.52	-0.00752
1416	-0.00177	1416	-0.00486	1416	-0.00611	1416	-0.00649	1416	-0.007	1416	-0.00727	1416	-0.00766
1416.48	-0.00188	1416.48	-0.00518	1416.48	-0.00644	1416.48	-0.00676	1416.48	-0.00723	1416.48	-0.00745	1416.48	-0.0078
1416.96	-0.00201	1416.96	-0.00555	1416.96	-0.00681	1416.96	-0.00707	1416.96	-0.00752	1416.96	-0.00767	1416.96	-0.00796
1417.45	-0.00216	1417.45	-0.00598	1417.45	-0.00727	1417.45	-0.00749	1417.45	-0.0079	1417.45	-0.00798	1417.45	-0.00823
1417.93	-0.00235	1417.93	-0.00652	1417.93	-0.00786	1417.93	-0.00809	1417.93	-0.00848	1417.93	-0.00849	1417.93	-0.00869
1418.41	-0.00258	1418.41	-0.00719	1418.41	-0.00863	1418.41	-0.00892	1418.41	-0.0093	1418.41	-0.00926	1418.41	-0.00943
1418.89	-0.00285	1418.89	-0.00797	1418.89	-0.00955	1418.89	-0.00996	1418.89	-0.01035	1418.89	-0.0103	1418.89	-0.01046
1419.38	-0.00312	1419.38	-0.00878	1419.38	-0.01053	1419.38	-0.0111	1419.38	-0.01151	1419.38	-0.01149	1419.38	-0.01166
1419.86	-0.00335	1419.86	-0.0095	1419.86	-0.01144	1419.86	-0.01215	1419.86	-0.0126	1419.86	-0.01263	1419.86	-0.01283
1420.34	-0.00354	1420.34	-0.01008	1420.34	-0.01217	1420.34	-0.01299	1420.34	-0.01348	1420.34	-0.01357	1420.34	-0.01381
1420.82	-0.00367	1420.82	-0.01049	1420.82	-0.01268	1420.82	-0.01356	1420.82	-0.01408	1420.82	-0.01423	1420.82	-0.01451
1421.3	-0.00376	1421.3	-0.01074	1421.3	-0.01299	1421.3	-0.01389	1421.3	-0.01442	1421.3	-0.01461	1421.3	-0.01493
1421.79	-0.00381	1421.79	-0.01087	1421.79	-0.01313	1421.79	-0.01401	1421.79	-0.01454	1421.79	-0.01476	1421.79	-0.01509
1422.27	-0.00383	1422.27	-0.01089	1422.27	-0.01314	1422.27	-0.01397	1422.27	-0.01449	1422.27	-0.01471	1422.27	-0.01505
1422.75	-0.00383	1422.75	-0.01084	1422.75	-0.01303	1422.75	-0.01382	1422.75	-0.01432	1422.75	-0.01452	1422.75	-0.01486
1423.23	-0.00382	1423.23	-0.01071	1423.23	-0.01282	1423.23	-0.01359	1423.23	-0.01405	1423.23	-0.01424	1423.23	-0.01457
1423.71	-0.00379	1423.71	-0.01052	1423.71	-0.01255	1423.71	-0.0133	1423.71	-0.01373	1423.71	-0.0139	1423.71	-0.01423
1424.2	-0.00375	1424.2	-0.01028	1424.2	-0.01223	1424.2	-0.01297	1424.2	-0.01339	1424.2	-0.01355	1424.2	-0.01388
1424.68	-0.00369	1424.68	-0.01001	1424.68	-0.01189	1424.68	-0.01262	1424.68	-0.01303	1424.68	-0.0132	1424.68	-0.01354
1425.16	-0.00362	1425.16	-0.00971	1425.16	-0.01153	1425.16	-0.01226	1425.16	-0.01267	1425.16	-0.01286	1425.16	-0.01321
1425.64	-0.00355	1425.64	-0.00941	1425.64	-0.01117	1425.64	-0.01188	1425.64	-0.0123	1425.64	-0.01251	1425.64	-0.01287
1426.12	-0.00347	1426.12	-0.00911	1426.12	-0.0108	1426.12	-0.01147	1426.12	-0.01189	1426.12	-0.01213	1426.12	-0.0125
1426.61	-0.00338	1426.61	-0.00879	1426.61	-0.01042	1426.61	-0.01103	1426.61	-0.01145	1426.61	-0.01169	1426.61	-0.01206
1427.09	-0.00328	1427.09	-0.00847	1427.09	-0.01002	1427.09	-0.01055	1427.09	-0.01096	1427.09	-0.0112	1427.09	-0.01156
1427.57	-0.00318	1427.57	-0.00815	1427.57	-0.0096	1427.57	-0.01006	1427.57	-0.01045	1427.57	-0.01066	1427.57	-0.01101
1428.05	-0.00308	1428.05	-0.00782	1428.05	-0.00917	1428.05	-0.00956	1428.05	-0.00992	1428.05	-0.0101	1428.05	-0.01042
1428.54	-0.00298	1428.54	-0.0075	1428.54	-0.00874	1428.54	-0.00908	1428.54	-0.00941	1428.54	-0.00954	1428.54	-0.00984
1429.02	-0.0029	1429.02	-0.00721	1429.02	-0.00836	1429.02	-0.00866	1429.02	-0.00896	1429.02	-0.00905	1429.02	-0.00932
1429.5	-0.00283	1429.5	-0.00695	1429.5	-0.00803	1429.5	-0.00832	1429.5	-0.00859	1429.5	-0.00865	1429.5	-0.00891
1429.98	-0.00278	1429.98	-0.00675	1429.98	-0.00778	1429.98	-0.00807	1429.98	-0.00834	1429.98	-0.00837	1429.98	-0.00862
1430.46	-0.00274	1430.46	-0.0066	1430.46	-0.00761	1430.46	-0.00792	1430.46	-0.00818	1430.46	-0.00822	1430.46	-0.00847
1430.95	-0.00272	1430.95	-0.0065	1430.95	-0.00752	1430.95	-0.00784	1430.95	-0.00811	1430.95	-0.00816	1430.95	-0.00842
1431.43	-0.00271	1431.43	-0.00644	1431.43	-0.00748	1431.43	-0.00782	1431.43	-0.00811	1431.43	-0.00818	1431.43	-0.00845
1431.91	-0.00271	1431.91	-0.00642	1431.91	-0.00748	1431.91	-0.00783	1431.91	-0.00814	1431.91	-0.00824	1431.91	-0.00852
1432.39	-0.00272	1432.39	-0.00642	1432.39	-0.00751	1432.39	-0.00785	1432.39	-0.00818	1432.39	-0.00831	1432.39	-0.0086
1432.87	-0.00272	1432.87	-0.00643	1432.87	-0.00754	1432.87	-0.00786	1432.87	-0.00821	1432.87	-0.00836	1432.87	-0.00866
1433.36	-0.00272	1433.36	-0.00644	1433.36	-0.00757	1433.36	-0.00785	1433.36	-0.00821	1433.36	-0.00837	1433.36	-0.00868
1433.84	-0.00272	1433.84	-0.00644	1433.84	-0.00757	1433.84	-0.0078	1433.84	-0.00818	1433.84	-0.00835	1433.84	-0.00865
1434.32	-0.00272	1434.32	-0.00644	1434.32	-0.00756	1434.32	-0.00774	1434.32	-0.00813	1434.32	-0.00828	1434.32	-0.00857
1434.8	-0.00272	1434.8	-0.00644	1434.8	-0.00754	1434.8	-0.00769	1434.8	-0.00806	1434.8	-0.00819	1434.8	-0.00846
1435.29	-0.00272	1435.29	-0.00647	1435.29	-0.00755	1435.29	-0.00768	1435.29	-0.00804	1435.29	-0.00813	1435.29	-0.00838
1435.77	-0.00275	1435.77	-0.00655	1435.77	-0.00762	1435.77	-0.00778	1435.77	-0.00813	1435.77	-0.00818	1435.77	-0.00841
1436.25	-0.00279	1436.25	-0.0067	1436.25	-0.00779	1436.25	-0.00804	1436.25	-0.00838	1436.25	-0.00842	1436.25	-0.00863
1436.73	-0.00286	1436.73	-0.00693	1436.73	-0.00808	1436.73	-0.00846	1436.73	-0.00882	1436.73	-0.00886	1436.73	-0.00908
1437.21	-0.00294	1437.21	-0.00721	1437.21	-0.00845	1437.21	-0.00898	1437.21	-0.00938	1437.21	-0.00945	1437.21	-0.00971
1437.7	-0.00302	1437.7	-0.0075	1437.7	-0.00885	1437.7	-0.00952	1437.7	-0.00997	1437.7	-0.0101	1437.7	-0.01041
1438.18	-0.0031	1438.18	-0.00776	1438.18	-0.00923	1438.18	-0.01	1438.18	-0.01051	1438.18	-0.01071	1438.18	-0.01109
1438.66	-0.00316	1438.66	-0.00799	1438.66	-0.00956	1438.66	-0.0104	1438.66	-0.01097	1438.66	-0.01124	1438.66	-0.01167
1439.14	-0.00321	1439.14	-0.00819	1439.14	-0.00985	1439.14	-0.01072	1439.14	-0.01134	1439.14	-0.01168	1439.14	-0.01217
1439.62	-0.00326	1439.62	-0.00836	1439.62	-0.01011	1439.62	-0.011	1439.62	-0.01166	1439.62	-0.01205	1439.62	-0.01258
1440.11	-0.00331	1440.11	-0.00853	1440.11	-0.01034	1440.11	-0.01125	1440.11	-0.01193	1440.11	-0.01238	1440.11	-0.01294
1440.59	-0.00336	1440.59	-0.00869	1440.59	-0.01056	1440.59	-0.01148	1440.59	-0.01219	1440.59	-0.01267	1440.59	-0.01325
1441.07	-0.00341	1441.07	-0.00885	1441.07	-0.01078	1441.07	-0.0117	1441.07	-0.01243	1441.07	-0.01294	1441.07	-0.01353
1441.55	-0.00346	1441.55	-0.00901	1441.55	-0.01098	1441.55	-0.01192	1441.55	-0.01267	1441.55	-0.0132	1441.55	-0.01379
1442.04	-0.00352	1442.04	-0.00916	1442.04	-0.01117	1442.04	-0.01213	1442.04	-0.01289	1442.04	-0.01343	1442.04	-0.01403
1442.52	-0.00357	1442.52	-0.00931	1442.52	-0.01134	1442.52	-0.01232	1442.52	-0.0131	1442.52	-0.01365	1442.52	-0.01425
1443	-0.00362	1443	-0.00944	1443	-0.01151	1443	-0.0125	1443	-0.0133	1443	-0.01385	1443	-0.01445
1443.48	-0.00367	1443.48	-0.00957	1443.48	-0.01167	1443.48	-0.01266	1443.48	-0.01347	1443.48	-0.01403	1443.48	-0.01462
1443.96	-0.00372	1443.96	-0.00969	1443.96	-0.01181	1443.96	-0.0128	1443.96	-0.01362	1443.96	-0.01417	1443.96	-0.01476
1444.44	-0.00376	1444.44	-0.0098	1444.44	-0.01193	1444.44	-0.01292	1444.44	-0.01373	1444.44	-0.01427	1444.44	-0.01487
1444.93	-0.0038	1444.93	-0.0099	1444.93	-0.01204	1444.93	-0.013	1444.93	-0.01381	1444.93	-0.01434	1444.93	-0.01493
1445.41	-0.00383	1445.41	-0.00998	1445.41	-0.01213	1445.41	-0.01306	1445.41	-0.01386	1445.41	-0.01437	1445.41	-0.01496
1445.89	-0.00387	1445.89	-0.01006	1445.89	-0.01221	1445.89	-0.01311	1445.89	-0.01389	1445.89	-0.01437	1445.89	-0.01496
1446.37	-0.0039	1446.37	-0.01015	1446.37	-0.01229	1446.37	-0.01318	1446.37	-0.01394	1446.37	-0.01439	1446.37	-0.01496
1446.86	-0.00394	1446.86	-0.01025	1446.86	-0.01241	1446.86	-0.01329	1446.86	-0.01403	1446.86	-0.01445	1446.86	-0.01501
1447.34	-0.00399	1447.34	-0.0104	1447.34	-0.01258	1447.34	-0.01348	1447.34	-0.01422	1447.34	-0.01461	1447.34	-0.01517
1447.82	-0.00405	1447.82	-0.01061	1447.82	-0.01283	1447.82	-0.01379	1447.82	-0.01452	1447.82	-0.01491	1447.82	-0.01546
1448.3	-0.00413	1448.3	-0.0109	1448.3	-0.01319	1448.3	-0.01421	1448.3	-0.01496	1448.3	-0.01536	1448.3	-0.01591
1448.79	-0.00423	1448.79	-0.01125	1448.79	-0.01364	1448.79	-0.01474	1448.79	-0.01553	1448.79	-0.01595	1448.79	-0.01651
1449.27	-0.00436	1449.27	-0.01169	1449.27	-0.0142	1449.27	-0.01537	1449.27	-0.01621	1449.27	-0.01665	1449.27	-0.01723
1449.75	-0.00452	1449.75	-0.01222	1449.75	-0.01486	1449.75	-0.0161	1449.75	-0.01698	1449.75	-0.01746	1449.75	-0.01805
1450.23	-0.00471	1450.23	-0.01284	1450.23	-0.01563	1450.23	-0.01693	1450.23	-0.01785	1450.23	-0.01836	1450.23	-0.01897
1450.71	-0.00492	1450.71	-0.01355	1450.71	-0.01651	1450.71	-0.01786	1450.71	-0.01882	1450.71	-0.01935	1450.71	-0.01997
1451.19	-0.00517	1451.19	-0.01434	1451.19	-0.01747	1451.19	-0.01886	1451.19	-0.01985	1451.19	-0.02039	1451.19	-0.02101
1451.68	-0.00542	1451.68	-0.01514	1451.68	-0.01844	1451.68	-0.01987	1451.68	-0.02088	1451.68	-0.02141	1451.68	-0.02204
1452.16	-0.00566	1452.16	-0.0159	1452.16	-0.01935	1452.16	-0.02081	1452.16	-0.02182	1452.16	-0.02234	1452.16	-0.02296
1452.64	-0.00586	1452.64	-0.01654	1452.64	-0.0201	1452.64	-0.02157	1452.64	-0.02257	1452.64	-0.02307	1452.64	-0.02368
1453.12	-0.00602	1453.12	-0.01699	1453.12	-0.02063	1453.12	-0.02207	1453.12	-0.02305	1453.12	-0.02352	1453.12	-0.02412
1453.61	-0.00611	1453.61	-0.01723	1453.61	-0.02089	1453.61	-0.02226	1453.61	-0.02321	1453.61	-0.02365	1453.61	-0.02422
1454.09	-0.00614	1454.09	-0.01726	1454.09	-0.02088	1454.09	-0.02216	1454.09	-0.02306	1454.09	-0.02345	1454.09	-0.02398
1454.57	-0.00611	1454.57	-0.01709	1454.57	-0.02061	1454.57	-0.02174	1454.57	-0.02258	1454.57	-0.0229	1454.57	-0.02338
1455.05	-0.00601	1455.05	-0.0167	1455.05	-0.02004	1455.05	-0.02102	1455.05	-0.02176	1455.05	-0.022	1455.05	-0.02239
1455.53	-0.00585	1455.53	-0.01607	1455.53	-0.01916	1455.53	-0.01997	1455.53	-0.02059	1455.53	-0.02072	1455.53	-0.021
1456.02	-0.0056	1456.02	-0.01518	1456.02	-0.01795	1456.02	-0.01862	1456.02	-0.01908	1456.02	-0.01908	1456.02	-0.01923
1456.5	-0.00529	1456.5	-0.01409	1456.5	-0.01648	1456.5	-0.01707	1456.5	-0.01737	1456.5	-0.01724	1456.5	-0.01725
1456.98	-0.00496	1456.98	-0.01293	1456.98	-0.01499	1456.98	-0.01558	1456.98	-0.01577	1456.98	-0.01554	1456.98	-0.01547
1457.46	-0.00466	1457.46	-0.01195	1457.46	-0.01377	1457.46	-0.01446	1457.46	-0.0146	1457.46	-0.01436	1457.46	-0.01427
1457.94	-0.00445	1457.94	-0.01126	1457.94	-0.013	1457.94	-0.01382	1457.94	-0.014	1457.94	-0.01381	1457.94	-0.01377
1458.43	-0.00433	1458.43	-0.01085	1458.43	-0.01262	1458.43	-0.01357	1458.43	-0.01384	1458.43	-0.01375	1458.43	-0.01381
1458.91	-0.00425	1458.91	-0.01063	1458.91	-0.01247	1458.91	-0.01353	1458.91	-0.0139	1458.91	-0.01393	1458.91	-0.01412
1459.39	-0.00421	1459.39	-0.0105	1459.39	-0.01243	1459.39	-0.01356	1459.39	-0.01403	1459.39	-0.01418	1459.39	-0.01447
1459.87	-0.00418	1459.87	-0.0104	1459.87	-0.0124	1459.87	-0.01357	1459.87	-0.01414	1459.87	-0.0144	1459.87	-0.01478
1460.36	-0.00415	1460.36	-0.01031	1460.36	-0.01235	1460.36	-0.01353	1460.36	-0.01418	1460.36	-0.01453	1460.36	-0.01499
1460.84	-0.00412	1460.84	-0.01019	1460.84	-0.01227	1460.84	-0.01343	1460.84	-0.01414	1460.84	-0.01456	1460.84	-0.01508
1461.32	-0.00408	1461.32	-0.01006	1461.32	-0.01215	1461.32	-0.01326	1461.32	-0.01401	1461.32	-0.01448	1461.32	-0.01504
1461.8	-0.00404	1461.8	-0.00991	1461.8	-0.01198	1461.8	-0.01302	1461.8	-0.0138	1461.8	-0.01428	1461.8	-0.01488
1462.28	-0.00399	1462.28	-0.00974	1462.28	-0.01175	1462.28	-0.01272	1462.28	-0.01351	1462.28	-0.01398	1462.28	-0.01458
1462.77	-0.00393	1462.77	-0.00953	1462.77	-0.01148	1462.77	-0.01235	1462.77	-0.01313	1462.77	-0.01357	1462.77	-0.01416
1463.25	-0.00387	1463.25	-0.0093	1463.25	-0.01115	1463.25	-0.01194	1463.25	-0.01268	1463.25	-0.01307	1463.25	-0.01363
1463.73	-0.0038	1463.73	-0.00905	1463.73	-0.0108	1463.73	-0.01152	1463.73	-0.01221	1463.73	-0.01252	1463.73	-0.01304
1464.21	-0.00373	1464.21	-0.0088	1464.21	-0.01045	1464.21	-0.01112	1464.21	-0.01176	1464.21	-0.012	1464.21	-0.01247
1464.69	-0.00367	1464.69	-0.00859	1464.69	-0.01014	1464.69	-0.0108	1464.69	-0.01139	1464.69	-0.01157	1464.69	-0.01201
1465.18	-0.00363	1465.18	-0.00841	1465.18	-0.00991	1465.18	-0.01058	1465.18	-0.01114	1465.18	-0.01129	1465.18	-0.0117
1465.66	-0.00359	1465.66	-0.00829	1465.66	-0.00975	1465.66	-0.01045	1465.66	-0.011	1465.66	-0.01116	1465.66	-0.01157
1466.14	-0.00356	1466.14	-0.0082	1466.14	-0.00966	1466.14	-0.01038	1466.14	-0.01094	1466.14	-0.01114	1466.14	-0.01155
1466.62	-0.00354	1466.62	-0.00813	1466.62	-0.0096	1466.62	-0.01034	1466.62	-0.01091	1466.62	-0.01116	1466.62	-0.0116
1467.11	-0.00352	1467.11	-0.00808	1467.11	-0.00956	1467.11	-0.01029	1467.11	-0.0109	1467.11	-0.01119	1467.11	-0.01165
1467.59	-0.0035	1467.59	-0.00802	1467.59	-0.00951	1467.59	-0.01022	1467.59	-0.01086	1467.59	-0.0112	1467.59	-0.01169
1468.07	-0.00348	1468.07	-0.00795	1468.07	-0.00944	1468.07	-0.01013	1468.07	-0.01079	1468.07	-0.01116	1468.07	-0.01167
1468.55	-0.00345	1468.55	-0.00787	1468.55	-0.00935	1468.55	-0.01	1468.55	-0.01068	1468.55	-0.01106	1468.55	-0.01159
1469.03	-0.00342	1469.03	-0.00778	1469.03	-0.00923	1469.03	-0.00982	1469.03	-0.01051	1469.03	-0.01089	1469.03	-0.01143
1469.52	-0.00338	1469.52	-0.00766	1469.52	-0.00907	1469.52	-0.00959	1469.52	-0.01026	1469.52	-0.01063	1469.52	-0.01115
1470	-0.00334	1470	-0.0075	1470	-0.00885	1470	-0.00929	1470	-0.00992	1470	-0.01025	1470	-0.01075
1470.48	-0.00328	1470.48	-0.00731	1470.48	-0.00857	1470.48	-0.00891	1470.48	-0.00949	1470.48	-0.00976	1470.48	-0.0102
1470.96	-0.00322	1470.96	-0.00708	1470.96	-0.00823	1470.96	-0.00847	1470.96	-0.00897	1470.96	-0.00916	1470.96	-0.00953
1471.44	-0.00314	1471.44	-0.00682	1471.44	-0.00785	1471.44	-0.00801	1471.44	-0.00842	1471.44	-0.0085	1471.44	-0.00878
1471.93	-0.00307	1471.93	-0.00657	1471.93	-0.00748	1471.93	-0.0076	1471.93	-0.00791	1471.93	-0.00789	1471.93	-0.00808
1472.41	-0.00302	1472.41	-0.00636	1472.41	-0.00719	1472.41	-0.00733	1472.41	-0.00757	1472.41	-0.00747	1472.41	-0.00758
1472.89	-0.00299	1472.89	-0.00623	1472.89	-0.00703	1472.89	-0.00724	1472.89	-0.00745	1472.89	-0.00731	1472.89	-0.00739
1473.37	-0.00298	1473.37	-0.00618	1473.37	-0.00699	1473.37	-0.00731	1473.37	-0.00752	1473.37	-0.00739	1473.37	-0.00748
1473.86	-0.00298	1473.86	-0.00619	1473.86	-0.00705	1473.86	-0.00745	1473.86	-0.0077	1473.86	-0.00762	1473.86	-0.00774
1474.34	-0.00299	1474.34	-0.00621	1474.34	-0.00713	1474.34	-0.00761	1474.34	-0.00791	1474.34	-0.00788	1474.34	-0.00806
1474.82	-0.00299	1474.82	-0.00623	1474.82	-0.00722	1474.82	-0.00775	1474.82	-0.0081	1474.82	-0.00814	1474.82	-0.00837
1475.3	-0.00299	1475.3	-0.00625	1475.3	-0.00729	1475.3	-0.00788	1475.3	-0.00828	1475.3	-0.00838	1475.3	-0.00866
1475.78	-0.00299	1475.78	-0.00626	1475.78	-0.00735	1475.78	-0.008	1475.78	-0.00845	1475.78	-0.00861	1475.78	-0.00894
1476.27	-0.00299	1476.27	-0.00628	1476.27	-0.00742	1476.27	-0.00812	1476.27	-0.00862	1476.27	-0.00884	1476.27	-0.00922
1476.75	-0.00299	1476.75	-0.00629	1476.75	-0.00748	1476.75	-0.00824	1476.75	-0.00878	1476.75	-0.00907	1476.75	-0.0095
1477.23	-0.00298	1477.23	-0.00629	1477.23	-0.00752	1477.23	-0.00833	1477.23	-0.00892	1477.23	-0.00927	1477.23	-0.00974
1477.71	-0.00297	1477.71	-0.00627	1477.71	-0.00754	1477.71	-0.00838	1477.71	-0.00901	1477.71	-0.00942	1477.71	-0.00992
1478.19	-0.00295	1478.19	-0.00622	1478.19	-0.00752	1478.19	-0.00836	1478.19	-0.00903	1478.19	-0.00948	1478.19	-0.01002
1478.68	-0.00292	1478.68	-0.00616	1478.68	-0.00745	1478.68	-0.00828	1478.68	-0.00898	1478.68	-0.00945	1478.68	-0.01001
1479.16	-0.00289	1479.16	-0.00606	1479.16	-0.00735	1479.16	-0.00815	1479.16	-0.00886	1479.16	-0.00935	1479.16	-0.00992
1479.64	-0.00285	1479.64	-0.00595	1479.64	-0.00722	1479.64	-0.00798	1479.64	-0.00869	1479.64	-0.00918	1479.64	-0.00975
1480.12	-0.0028	1480.12	-0.00583	1480.12	-0.00707	1480.12	-0.00779	1480.12	-0.0085	1480.12	-0.00898	1480.12	-0.00955
1480.61	-0.00276	1480.61	-0.00571	1480.61	-0.00692	1480.61	-0.00762	1480.61	-0.00831	1480.61	-0.00878	1480.61	-0.00935
1481.09	-0.00271	1481.09	-0.0056	1481.09	-0.00679	1481.09	-0.00748	1481.09	-0.00816	1481.09	-0.00862	1481.09	-0.00918
1481.57	-0.00267	1481.57	-0.0055	1481.57	-0.00667	1481.57	-0.00737	1481.57	-0.00806	1481.57	-0.00851	1481.57	-0.00906
1482.05	-0.00264	1482.05	-0.00542	1482.05	-0.00659	1482.05	-0.00729	1482.05	-0.00799	1482.05	-0.00844	1482.05	-0.00899
1482.53	-0.0026	1482.53	-0.00535	1482.53	-0.00652	1482.53	-0.00723	1482.53	-0.00794	1482.53	-0.0084	1482.53	-0.00896
1483.02	-0.00257	1483.02	-0.00529	1483.02	-0.00646	1483.02	-0.00717	1483.02	-0.0079	1483.02	-0.00837	1483.02	-0.00893
1483.5	-0.00253	1483.5	-0.00524	1483.5	-0.00641	1483.5	-0.00709	1483.5	-0.00783	1483.5	-0.00831	1483.5	-0.00888
1483.98	-0.0025	1483.98	-0.00518	1483.98	-0.00634	1483.98	-0.00698	1483.98	-0.00773	1483.98	-0.00821	1483.98	-0.00877
1484.46	-0.00247	1484.46	-0.00512	1484.46	-0.00625	1484.46	-0.00684	1484.46	-0.00759	1484.46	-0.00805	1484.46	-0.0086
1484.94	-0.00243	1484.94	-0.00504	1484.94	-0.00612	1484.94	-0.00666	1484.94	-0.00738	1484.94	-0.00782	1484.94	-0.00834
1485.43	-0.00239	1485.43	-0.00493	1485.43	-0.00596	1485.43	-0.00643	1485.43	-0.00712	1485.43	-0.00751	1485.43	-0.008
1485.91	-0.00235	1485.91	-0.0048	1485.91	-0.00575	1485.91	-0.00615	1485.91	-0.00679	1485.91	-0.00712	1485.91	-0.00757
1486.39	-0.0023	1486.39	-0.00463	1486.39	-0.0055	1486.39	-0.00582	1486.39	-0.0064	1486.39	-0.00667	1486.39	-0.00707
1486.87	-0.00224	1486.87	-0.00444	1486.87	-0.00522	1486.87	-0.00546	1486.87	-0.00597	1486.87	-0.00617	1486.87	-0.00651
1487.35	-0.00218	1487.35	-0.00425	1487.35	-0.00495	1487.35	-0.00511	1487.35	-0.00554	1487.35	-0.00566	1487.35	-0.00594
1487.84	-0.00214	1487.84	-0.0041	1487.84	-0.00472	1487.84	-0.00482	1487.84	-0.00517	1487.84	-0.00521	1487.84	-0.00543
1488.32	-0.00211	1488.32	-0.00406	1488.32	-0.00464	1488.32	-0.00469	1488.32	-0.00497	1488.32	-0.00494	1488.32	-0.00511
1488.8	-0.00214	1488.8	-0.00422	1488.8	-0.00482	1488.8	-0.00486	1488.8	-0.00509	1488.8	-0.005	1488.8	-0.00513
1489.28	-0.00225	1489.28	-0.00468	1489.28	-0.00537	1489.28	-0.00549	1489.28	-0.00569	1489.28	-0.00557	1489.28	-0.00568
1489.77	-0.00247	1489.77	-0.0055	1489.77	-0.0064	1489.77	-0.00666	1489.77	-0.00687	1489.77	-0.00676	1489.77	-0.00689
1490.25	-0.00279	1490.25	-0.00664	1490.25	-0.00785	1490.25	-0.00831	1490.25	-0.00859	1490.25	-0.00854	1490.25	-0.00871
1490.73	-0.00317	1490.73	-0.00799	1490.73	-0.00956	1490.73	-0.01026	1490.73	-0.01064	1490.73	-0.01069	1490.73	-0.01092
1491.21	-0.00358	1491.21	-0.00936	1491.21	-0.0113	1491.21	-0.01223	1491.21	-0.01273	1491.21	-0.01289	1491.21	-0.01319
1491.69	-0.00396	1491.69	-0.01061	1491.69	-0.01289	1491.69	-0.01399	1491.69	-0.01461	1491.69	-0.01488	1491.69	-0.01526
1492.18	-0.00429	1492.18	-0.01166	1492.18	-0.01421	1492.18	-0.01542	1492.18	-0.01614	1492.18	-0.01651	1492.18	-0.01694
1492.66	-0.00454	1492.66	-0.01246	1492.66	-0.01521	1492.66	-0.01648	1492.66	-0.01728	1492.66	-0.01771	1492.66	-0.01819
1493.14	-0.00472	1493.14	-0.01301	1493.14	-0.01589	1493.14	-0.01716	1493.14	-0.01802	1493.14	-0.01848	1493.14	-0.01899
1493.62	-0.00482	1493.62	-0.01331	1493.62	-0.01625	1493.62	-0.01748	1493.62	-0.01836	1493.62	-0.01884	1493.62	-0.01935
1494.1	-0.00484	1494.1	-0.01336	1494.1	-0.01629	1494.1	-0.01745	1494.1	-0.01832	1494.1	-0.01878	1494.1	-0.01928
1494.59	-0.00478	1494.59	-0.01314	1494.59	-0.01599	1494.59	-0.01706	1494.59	-0.0179	1494.59	-0.01832	1494.59	-0.01879
1495.07	-0.00463	1495.07	-0.01265	1495.07	-0.01536	1495.07	-0.01633	1495.07	-0.01711	1495.07	-0.01747	1495.07	-0.0179
1495.55	-0.00441	1495.55	-0.01192	1495.55	-0.01443	1495.55	-0.01531	1495.55	-0.01601	1495.55	-0.01629	1495.55	-0.01667
1496.03	-0.00412	1496.03	-0.01101	1496.03	-0.01329	1496.03	-0.01409	1496.03	-0.01471	1496.03	-0.01491	1496.03	-0.01523
1496.52	-0.00381	1496.52	-0.01002	1496.52	-0.01205	1496.52	-0.01281	1496.52	-0.01335	1496.52	-0.01348	1496.52	-0.01376
1497	-0.0035	1497	-0.00905	1497	-0.01087	1497	-0.01161	1497	-0.01209	1497	-0.01216	1497	-0.01243
1497.48	-0.00323	1497.48	-0.0082	1497.48	-0.00985	1497.48	-0.01058	1497.48	-0.01104	1497.48	-0.01108	1497.48	-0.01135
1497.96	-0.003	1497.96	-0.0075	1497.96	-0.00903	1497.96	-0.00977	1497.96	-0.01022	1497.96	-0.01026	1497.96	-0.01055
1498.44	-0.00281	1498.44	-0.00695	1498.44	-0.00839	1498.44	-0.00914	1498.44	-0.0096	1498.44	-0.00966	1498.44	-0.00997
1498.93	-0.00266	1498.93	-0.0065	1498.93	-0.00789	1498.93	-0.00866	1498.93	-0.00914	1498.93	-0.00923	1498.93	-0.00957
1499.41	-0.00253	1499.41	-0.00614	1499.41	-0.0075	1499.41	-0.00828	1499.41	-0.00879	1499.41	-0.00892	1499.41	-0.00928
1499.89	-0.00242	1499.89	-0.00584	1499.89	-0.00718	1499.89	-0.00797	1499.89	-0.0085	1499.89	-0.00868	1499.89	-0.00907
1500.37	-0.00233	1500.37	-0.00558	1500.37	-0.00691	1500.37	-0.0077	1500.37	-0.00826	1500.37	-0.00848	1500.37	-0.00889
1500.85	-0.00225	1500.85	-0.00536	1500.85	-0.00668	1500.85	-0.00746	1500.85	-0.00803	1500.85	-0.0083	1500.85	-0.00872
1501.34	-0.00217	1501.34	-0.00515	1501.34	-0.00646	1501.34	-0.00722	1501.34	-0.00781	1501.34	-0.00811	1501.34	-0.00854
1501.82	-0.0021	1501.82	-0.00495	1501.82	-0.00625	1501.82	-0.00696	1501.82	-0.00757	1501.82	-0.0079	1501.82	-0.00834
1502.3	-0.00203	1502.3	-0.00476	1502.3	-0.00603	1502.3	-0.00668	1502.3	-0.00731	1502.3	-0.00765	1502.3	-0.0081
1502.78	-0.00196	1502.78	-0.00457	1502.78	-0.0058	1502.78	-0.00638	1502.78	-0.00701	1502.78	-0.00735	1502.78	-0.0078
1503.27	-0.00188	1503.27	-0.00438	1503.27	-0.00556	1503.27	-0.00604	1503.27	-0.00667	1503.27	-0.007	1503.27	-0.00744
1503.75	-0.00181	1503.75	-0.00419	1503.75	-0.00529	1503.75	-0.00566	1503.75	-0.00627	1503.75	-0.00657	1503.75	-0.007
1504.23	-0.00174	1504.23	-0.004	1504.23	-0.00501	1504.23	-0.00524	1504.23	-0.00582	1504.23	-0.00606	1504.23	-0.00645
1504.71	-0.00168	1504.71	-0.00382	1504.71	-0.0047	1504.71	-0.00477	1504.71	-0.00529	1504.71	-0.00543	1504.71	-0.00576
1505.19	-0.00162	1505.19	-0.00367	1505.19	-0.00438	1505.19	-0.00429	1505.19	-0.00471	1505.19	-0.00469	1505.19	-0.00492
1505.67	-0.00159	1505.67	-0.00364	1505.67	-0.00415	1505.67	-0.0039	1505.67	-0.00417	1505.67	-0.00392	1505.67	-0.00401
1506.16	-0.00163	1506.16	-0.00387	1506.16	-0.00421	1506.16	-0.00386	1506.16	-0.00393	1506.16	-0.00339	1506.16	-0.00328
1506.64	-0.0018	1506.64	-0.00457	1506.64	-0.00487	1506.64	-0.00455	1506.64	-0.00443	1506.64	-0.00359	1506.64	-0.00329
1507.12	-0.00214	1507.12	-0.0058	1507.12	-0.00627	1507.12	-0.00614	1507.12	-0.00591	1507.12	-0.0049	1507.12	-0.00447
1507.6	-0.00258	1507.6	-0.00731	1507.6	-0.00814	1507.6	-0.0083	1507.6	-0.00809	1507.6	-0.00707	1507.6	-0.00664
1508.09	-0.00302	1508.09	-0.00876	1508.09	-0.01004	1508.09	-0.01047	1508.09	-0.01037	1508.09	-0.00948	1508.09	-0.00914
1508.57	-0.00341	1508.57	-0.01	1508.57	-0.01169	1508.57	-0.01235	1508.57	-0.01239	1508.57	-0.01167	1508.57	-0.01147
1509.05	-0.00375	1509.05	-0.01103	1509.05	-0.01309	1509.05	-0.01389	1509.05	-0.01408	1509.05	-0.01354	1509.05	-0.01346
1509.53	-0.00404	1509.53	-0.01191	1509.53	-0.01426	1509.53	-0.01518	1509.53	-0.0155	1509.53	-0.01511	1509.53	-0.01515
1510.01	-0.0043	1510.01	-0.01266	1510.01	-0.01525	1510.01	-0.01628	1510.01	-0.0167	1510.01	-0.01645	1510.01	-0.01659
1510.5	-0.00452	1510.5	-0.01329	1510.5	-0.01609	1510.5	-0.0172	1510.5	-0.01771	1510.5	-0.01759	1510.5	-0.0178
1510.98	-0.00471	1510.98	-0.0138	1510.98	-0.01676	1510.98	-0.01794	1510.98	-0.01853	1510.98	-0.01851	1510.98	-0.01878
1511.46	-0.00485	1511.46	-0.01416	1511.46	-0.01723	1511.46	-0.01848	1511.46	-0.01914	1511.46	-0.01921	1511.46	-0.01952
1511.94	-0.00494	1511.94	-0.01435	1511.94	-0.0175	1511.94	-0.0188	1511.94	-0.01949	1511.94	-0.01964	1511.94	-0.01998
1512.42	-0.00498	1512.42	-0.01438	1512.42	-0.01756	1512.42	-0.01887	1512.42	-0.0196	1512.42	-0.0198	1512.42	-0.02016
1512.91	-0.00496	1512.91	-0.01426	1512.91	-0.01743	1512.91	-0.01872	1512.91	-0.01946	1512.91	-0.0197	1512.91	-0.02006
1513.39	-0.0049	1513.39	-0.01402	1513.39	-0.01713	1513.39	-0.01836	1513.39	-0.0191	1513.39	-0.01935	1513.39	-0.01971
1513.87	-0.0048	1513.87	-0.01367	1513.87	-0.01669	1513.87	-0.01783	1513.87	-0.01854	1513.87	-0.01879	1513.87	-0.01913
1514.35	-0.00467	1514.35	-0.01322	1514.35	-0.01612	1514.35	-0.01715	1514.35	-0.01782	1514.35	-0.01803	1514.35	-0.01834
1514.84	-0.0045	1514.84	-0.01268	1514.84	-0.01541	1514.84	-0.01631	1514.84	-0.01693	1514.84	-0.01708	1514.84	-0.01735
1515.32	-0.00429	1515.32	-0.01203	1515.32	-0.01456	1515.32	-0.01535	1515.32	-0.0159	1515.32	-0.01597	1515.32	-0.01618
1515.8	-0.00404	1515.8	-0.01128	1515.8	-0.01359	1515.8	-0.01429	1515.8	-0.01477	1515.8	-0.01475	1515.8	-0.0149
1516.28	-0.00377	1516.28	-0.01047	1516.28	-0.01258	1516.28	-0.01321	1516.28	-0.01362	1516.28	-0.01353	1516.28	-0.01362
1516.76	-0.00351	1516.76	-0.00969	1516.76	-0.01161	1516.76	-0.01223	1516.76	-0.01259	1516.76	-0.01244	1516.76	-0.0125
1517.25	-0.00327	1517.25	-0.00901	1517.25	-0.01079	1517.25	-0.01141	1517.25	-0.01175	1517.25	-0.01158	1517.25	-0.01163
1517.73	-0.00307	1517.73	-0.00846	1517.73	-0.01017	1517.73	-0.01079	1517.73	-0.01112	1517.73	-0.01097	1517.73	-0.01103
1518.21	-0.00292	1518.21	-0.00806	1518.21	-0.0097	1518.21	-0.0103	1518.21	-0.01064	1518.21	-0.01051	1518.21	-0.0106
1518.69	-0.0028	1518.69	-0.00773	1518.69	-0.00933	1518.69	-0.00987	1518.69	-0.01022	1518.69	-0.0101	1518.69	-0.01021
1519.17	-0.00269	1519.17	-0.00744	1519.17	-0.00898	1519.17	-0.00943	1519.17	-0.00977	1519.17	-0.00964	1519.17	-0.00976
1519.66	-0.00259	1519.66	-0.00715	1519.66	-0.00859	1519.66	-0.00892	1519.66	-0.00924	1519.66	-0.00907	1519.66	-0.00917
1520.14	-0.00247	1520.14	-0.00682	1520.14	-0.00814	1520.14	-0.00836	1520.14	-0.00862	1520.14	-0.00837	1520.14	-0.00844
1520.62	-0.00236	1520.62	-0.00646	1520.62	-0.00764	1520.62	-0.00779	1520.62	-0.00798	1520.62	-0.00763	1520.62	-0.00764
1521.1	-0.00226	1521.1	-0.00614	1521.1	-0.00719	1521.1	-0.00733	1521.1	-0.00746	1521.1	-0.007	1521.1	-0.00696
1521.59	-0.00219	1521.59	-0.00589	1521.59	-0.00689	1521.59	-0.0071	1521.59	-0.00719	1521.59	-0.00668	1521.59	-0.0066
1522.07	-0.00216	1522.07	-0.00578	1522.07	-0.00679	1522.07	-0.00711	1522.07	-0.00721	1522.07	-0.00669	1522.07	-0.00662
1522.55	-0.00216	1522.55	-0.00575	1522.55	-0.00683	1522.55	-0.00726	1522.55	-0.0074	1522.55	-0.00694	1522.55	-0.00691
1523.03	-0.00218	1523.03	-0.00578	1523.03	-0.00694	1523.03	-0.00744	1523.03	-0.00763	1523.03	-0.00726	1523.03	-0.00727
1523.51	-0.00219	1523.51	-0.0058	1523.51	-0.00704	1523.51	-0.00757	1523.51	-0.00781	1523.51	-0.00751	1523.51	-0.00758
1524	-0.0022	1524	-0.0058	1524	-0.00709	1524	-0.00763	1524	-0.0079	1524	-0.00767	1524	-0.00777
1524.48	-0.00219	1524.48	-0.00578	1524.48	-0.0071	1524.48	-0.00762	1524.48	-0.00792	1524.48	-0.00773	1524.48	-0.00786
1524.96	-0.00219	1524.96	-0.00574	1524.96	-0.00708	1524.96	-0.00759	1524.96	-0.0079	1524.96	-0.00775	1524.96	-0.00788
1525.44	-0.00218	1525.44	-0.0057	1525.44	-0.00706	1525.44	-0.00758	1525.44	-0.0079	1525.44	-0.00777	1525.44	-0.0079
1525.92	-0.00217	1525.92	-0.00568	1525.92	-0.00706	1525.92	-0.00761	1525.92	-0.00795	1525.92	-0.00784	1525.92	-0.00797
1526.41	-0.00217	1526.41	-0.00569	1526.41	-0.00711	1526.41	-0.00771	1526.41	-0.00808	1526.41	-0.00799	1526.41	-0.00813
1526.89	-0.00217	1526.89	-0.00572	1526.89	-0.00719	1526.89	-0.00786	1526.89	-0.00827	1526.89	-0.00823	1526.89	-0.00839
1527.37	-0.00217	1527.37	-0.00577	1527.37	-0.00731	1527.37	-0.00804	1527.37	-0.0085	1527.37	-0.00851	1527.37	-0.00872
1527.85	-0.00218	1527.85	-0.00582	1527.85	-0.00743	1527.85	-0.00823	1527.85	-0.00875	1527.85	-0.00882	1527.85	-0.00908
1528.34	-0.00218	1528.34	-0.00588	1528.34	-0.00756	1528.34	-0.00841	1528.34	-0.00899	1528.34	-0.00912	1528.34	-0.00943
1528.82	-0.00219	1528.82	-0.00593	1528.82	-0.00767	1528.82	-0.00857	1528.82	-0.00919	1528.82	-0.00939	1528.82	-0.00974
1529.3	-0.00219	1529.3	-0.00597	1529.3	-0.00776	1529.3	-0.00867	1529.3	-0.00933	1529.3	-0.00959	1529.3	-0.00999
1529.78	-0.00219	1529.78	-0.00599	1529.78	-0.00782	1529.78	-0.00873	1529.78	-0.00941	1529.78	-0.0097	1529.78	-0.01013
1530.26	-0.00219	1530.26	-0.00599	1530.26	-0.00783	1530.26	-0.00871	1530.26	-0.00941	1530.26	-0.00972	1530.26	-0.01017
1530.75	-0.00217	1530.75	-0.00596	1530.75	-0.00779	1530.75	-0.00862	1530.75	-0.00931	1530.75	-0.00962	1530.75	-0.01007
1531.23	-0.00215	1531.23	-0.0059	1531.23	-0.00769	1531.23	-0.00845	1531.23	-0.00913	1531.23	-0.00941	1531.23	-0.00984
1531.71	-0.00213	1531.71	-0.00582	1531.71	-0.00755	1531.71	-0.00824	1531.71	-0.00887	1531.71	-0.00911	1531.71	-0.00951
1532.19	-0.0021	1532.19	-0.00572	1532.19	-0.00738	1532.19	-0.00802	1532.19	-0.0086	1532.19	-0.00878	1532.19	-0.00912
1532.67	-0.00207	1532.67	-0.00564	1532.67	-0.00724	1532.67	-0.00787	1532.67	-0.0084	1532.67	-0.00851	1532.67	-0.00879
1533.16	-0.00207	1533.16	-0.00561	1533.16	-0.00718	1533.16	-0.00786	1533.16	-0.00837	1533.16	-0.00843	1533.16	-0.00866
1533.64	-0.00208	1533.64	-0.00565	1533.64	-0.00724	1533.64	-0.00803	1533.64	-0.00853	1533.64	-0.00859	1533.64	-0.0088
1534.12	-0.00211	1534.12	-0.00575	1534.12	-0.0074	1534.12	-0.00832	1534.12	-0.00885	1534.12	-0.00894	1534.12	-0.00916
1534.6	-0.00213	1534.6	-0.00587	1534.6	-0.0076	1534.6	-0.00861	1534.6	-0.0092	1534.6	-0.00935	1534.6	-0.00961
1535.09	-0.00215	1535.09	-0.00597	1535.09	-0.00777	1535.09	-0.00882	1535.09	-0.00947	1535.09	-0.0097	1535.09	-0.01
1535.57	-0.00216	1535.57	-0.00604	1535.57	-0.00788	1535.57	-0.00891	1535.57	-0.00962	1535.57	-0.00991	1535.57	-0.01026
1536.05	-0.00215	1536.05	-0.00605	1536.05	-0.00792	1536.05	-0.00889	1536.05	-0.00963	1536.05	-0.00997	1536.05	-0.01036
1536.53	-0.00213	1536.53	-0.00602	1536.53	-0.00789	1536.53	-0.00875	1536.53	-0.00952	1536.53	-0.00988	1536.53	-0.01029
1537.01	-0.0021	1537.01	-0.00595	1537.01	-0.00779	1537.01	-0.00851	1537.01	-0.00929	1537.01	-0.00965	1537.01	-0.01006
1537.49	-0.00206	1537.49	-0.00584	1537.49	-0.00761	1537.49	-0.00819	1537.49	-0.00894	1537.49	-0.00926	1537.49	-0.00966
1537.98	-0.00201	1537.98	-0.00569	1537.98	-0.00736	1537.98	-0.00777	1537.98	-0.00848	1537.98	-0.00872	1537.98	-0.00907
1538.46	-0.00195	1538.46	-0.00551	1538.46	-0.00701	1538.46	-0.00726	1538.46	-0.00789	1538.46	-0.008	1538.46	-0.00828
1538.94	-0.0019	1538.94	-0.0053	1538.94	-0.00659	1538.94	-0.00671	1538.94	-0.00721	1538.94	-0.00714	1538.94	-0.00731
1539.42	-0.00186	1539.42	-0.00509	1539.42	-0.00616	1539.42	-0.00621	1539.42	-0.00656	1539.42	-0.00627	1539.42	-0.00629
1539.91	-0.00184	1539.91	-0.00496	1539.91	-0.00584	1539.91	-0.00594	1539.91	-0.00613	1539.91	-0.00564	1539.91	-0.00553
1540.39	-0.00185	1540.39	-0.00497	1540.39	-0.00578	1540.39	-0.00602	1540.39	-0.00609	1540.39	-0.0055	1540.39	-0.00529
1540.87	-0.0019	1540.87	-0.0051	1540.87	-0.00598	1540.87	-0.00641	1540.87	-0.00645	1540.87	-0.00586	1540.87	-0.00563
1541.35	-0.00196	1541.35	-0.00531	1541.35	-0.00636	1541.35	-0.00695	1541.35	-0.00701	1541.35	-0.00651	1541.35	-0.00631
1541.84	-0.00201	1541.84	-0.00554	1541.84	-0.00676	1541.84	-0.00747	1541.84	-0.00761	1541.84	-0.00721	1541.84	-0.00708
1542.32	-0.00207	1542.32	-0.00573	1542.32	-0.00713	1542.32	-0.00792	1542.32	-0.00813	1542.32	-0.00785	1542.32	-0.00778
1542.8	-0.00211	1542.8	-0.00589	1542.8	-0.00744	1542.8	-0.00829	1542.8	-0.00858	1542.8	-0.0084	1542.8	-0.00839
1543.28	-0.00215	1543.28	-0.00604	1543.28	-0.00772	1543.28	-0.00863	1543.28	-0.00901	1543.28	-0.00891	1543.28	-0.00896
1543.76	-0.0022	1543.76	-0.0062	1543.76	-0.00801	1543.76	-0.00901	1543.76	-0.00948	1543.76	-0.00946	1543.76	-0.00957
1544.24	-0.00226	1544.24	-0.00639	1544.24	-0.00833	1544.24	-0.00946	1544.24	-0.01003	1544.24	-0.01011	1544.24	-0.01029
1544.73	-0.00232	1544.73	-0.00661	1544.73	-0.00871	1544.73	-0.00998	1544.73	-0.01068	1544.73	-0.01086	1544.73	-0.01112
1545.21	-0.00239	1545.21	-0.00686	1545.21	-0.00911	1545.21	-0.01054	1545.21	-0.01136	1545.21	-0.01166	1545.21	-0.01201
1545.69	-0.00245	1545.69	-0.0071	1545.69	-0.0095	1545.69	-0.01106	1545.69	-0.01199	1545.69	-0.01242	1545.69	-0.01286
1546.17	-0.00251	1546.17	-0.0073	1546.17	-0.00984	1546.17	-0.01148	1546.17	-0.01252	1546.17	-0.01305	1546.17	-0.01358
1546.66	-0.00254	1546.66	-0.00746	1546.66	-0.0101	1546.66	-0.01178	1546.66	-0.0129	1546.66	-0.01351	1546.66	-0.01411
1547.14	-0.00257	1547.14	-0.00756	1547.14	-0.01027	1547.14	-0.01195	1547.14	-0.01312	1547.14	-0.0138	1547.14	-0.01444
1547.62	-0.00258	1547.62	-0.00762	1547.62	-0.01038	1547.62	-0.01202	1547.62	-0.01322	1547.62	-0.01394	1547.62	-0.0146
1548.1	-0.00258	1548.1	-0.00766	1548.1	-0.01044	1548.1	-0.01204	1548.1	-0.01325	1548.1	-0.01397	1548.1	-0.01464
1548.58	-0.00259	1548.58	-0.0077	1548.58	-0.01048	1548.58	-0.01205	1548.58	-0.01325	1548.58	-0.01396	1548.58	-0.01462
1549.07	-0.00261	1549.07	-0.00776	1549.07	-0.01055	1549.07	-0.01211	1549.07	-0.01329	1549.07	-0.01398	1549.07	-0.01463
1549.55	-0.00264	1549.55	-0.00784	1549.55	-0.01066	1549.55	-0.01225	1549.55	-0.01341	1549.55	-0.01408	1549.55	-0.01472
1550.03	-0.00268	1550.03	-0.00797	1550.03	-0.01082	1550.03	-0.01245	1550.03	-0.01362	1550.03	-0.01429	1550.03	-0.01493
1550.51	-0.00272	1550.51	-0.0081	1550.51	-0.01101	1550.51	-0.01269	1550.51	-0.01388	1550.51	-0.01456	1550.51	-0.01521
1550.99	-0.00276	1550.99	-0.00823	1550.99	-0.01119	1550.99	-0.01291	1550.99	-0.01414	1550.99	-0.01484	1550.99	-0.01552
1551.48	-0.00279	1551.48	-0.00834	1551.48	-0.01135	1551.48	-0.01309	1551.48	-0.01436	1551.48	-0.01508	1551.48	-0.01579
1551.96	-0.00282	1551.96	-0.00844	1551.96	-0.01148	1551.96	-0.01321	1551.96	-0.01451	1551.96	-0.01525	1551.96	-0.01598
1552.44	-0.00284	1552.44	-0.00852	1552.44	-0.01158	1552.44	-0.01329	1552.44	-0.01461	1552.44	-0.01535	1552.44	-0.0161
1552.92	-0.00287	1552.92	-0.0086	1552.92	-0.01166	1552.92	-0.01335	1552.92	-0.01466	1552.92	-0.01539	1552.92	-0.01614
1553.41	-0.00291	1553.41	-0.00869	1553.41	-0.01174	1553.41	-0.0134	1553.41	-0.0147	1553.41	-0.01541	1553.41	-0.01614
1553.89	-0.00296	1553.89	-0.00879	1553.89	-0.01183	1553.89	-0.01347	1553.89	-0.01475	1553.89	-0.01542	1553.89	-0.01613
1554.37	-0.00301	1554.37	-0.0089	1554.37	-0.01191	1554.37	-0.01354	1554.37	-0.01479	1554.37	-0.01542	1554.37	-0.01611
1554.85	-0.00305	1554.85	-0.00899	1554.85	-0.01199	1554.85	-0.0136	1554.85	-0.01482	1554.85	-0.01543	1554.85	-0.01609
1555.33	-0.00309	1555.33	-0.00906	1555.33	-0.01203	1555.33	-0.0136	1555.33	-0.01481	1555.33	-0.01539	1555.33	-0.01604
1555.82	-0.0031	1555.82	-0.00908	1555.82	-0.01203	1555.82	-0.01352	1555.82	-0.01473	1555.82	-0.01529	1555.82	-0.01593
1556.3	-0.0031	1556.3	-0.00905	1556.3	-0.01197	1556.3	-0.01335	1556.3	-0.01454	1556.3	-0.01508	1556.3	-0.01569
1556.78	-0.00309	1556.78	-0.00898	1556.78	-0.01183	1556.78	-0.01306	1556.78	-0.01422	1556.78	-0.01471	1556.78	-0.01529
1557.26	-0.00307	1557.26	-0.00886	1557.26	-0.01161	1557.26	-0.01268	1557.26	-0.01377	1557.26	-0.01418	1557.26	-0.0147
1557.74	-0.00307	1557.74	-0.00876	1557.74	-0.01137	1557.74	-0.01231	1557.74	-0.01328	1557.74	-0.01357	1557.74	-0.01398
1558.23	-0.00312	1558.23	-0.0088	1558.23	-0.01129	1558.23	-0.01222	1558.23	-0.01304	1558.23	-0.01316	1558.23	-0.01345
1558.71	-0.00329	1558.71	-0.00918	1558.71	-0.01167	1558.71	-0.01284	1558.71	-0.01355	1558.71	-0.01353	1558.71	-0.01374
1559.19	-0.00355	1559.19	-0.00996	1559.19	-0.01265	1559.19	-0.01427	1559.19	-0.015	1559.19	-0.01499	1559.19	-0.01524
1559.67	-0.00382	1559.67	-0.01085	1559.67	-0.01387	1559.67	-0.01596	1559.67	-0.01684	1559.67	-0.01699	1559.67	-0.01738
1560.15	-0.00402	1560.15	-0.0116	1560.15	-0.01495	1560.15	-0.01734	1560.15	-0.01842	1560.15	-0.01879	1560.15	-0.01935
1560.64	-0.00416	1560.64	-0.01214	1560.64	-0.01576	1560.64	-0.0183	1560.64	-0.01955	1560.64	-0.02012	1560.64	-0.02084
1561.12	-0.00425	1561.12	-0.01253	1561.12	-0.01634	1561.12	-0.01894	1561.12	-0.02033	1561.12	-0.02106	1561.12	-0.02189
1561.6	-0.00432	1561.6	-0.01282	1561.6	-0.01678	1561.6	-0.01937	1561.6	-0.02086	1561.6	-0.02171	1561.6	-0.02263
1562.08	-0.00438	1562.08	-0.01306	1562.08	-0.01711	1562.08	-0.01968	1562.08	-0.02125	1562.08	-0.02219	1562.08	-0.02317
1562.57	-0.00443	1562.57	-0.01326	1562.57	-0.01739	1562.57	-0.01993	1562.57	-0.02155	1562.57	-0.02256	1562.57	-0.02358
1563.05	-0.00449	1563.05	-0.01346	1563.05	-0.01765	1563.05	-0.02016	1563.05	-0.02182	1563.05	-0.02287	1563.05	-0.02391
1563.53	-0.00456	1563.53	-0.01368	1563.53	-0.01792	1563.53	-0.02041	1563.53	-0.02209	1563.53	-0.02317	1563.53	-0.02422
1564.01	-0.00464	1564.01	-0.01392	1564.01	-0.01821	1564.01	-0.02071	1564.01	-0.0224	1564.01	-0.0235	1564.01	-0.02455
1564.49	-0.00474	1564.49	-0.0142	1564.49	-0.01854	1564.49	-0.02105	1564.49	-0.02276	1564.49	-0.02387	1564.49	-0.02492
1564.98	-0.00485	1564.98	-0.0145	1564.98	-0.01889	1564.98	-0.02142	1564.98	-0.02315	1564.98	-0.02426	1564.98	-0.02532
1565.46	-0.00497	1565.46	-0.01478	1565.46	-0.01923	1565.46	-0.02178	1565.46	-0.02352	1565.46	-0.02465	1565.46	-0.0257
1565.94	-0.00507	1565.94	-0.01503	1565.94	-0.01952	1565.94	-0.02207	1565.94	-0.02383	1565.94	-0.02497	1565.94	-0.02603
1566.42	-0.00515	1566.42	-0.01523	1566.42	-0.01976	1566.42	-0.02227	1566.42	-0.02405	1566.42	-0.02519	1566.42	-0.02625
1566.9	-0.00521	1566.9	-0.01538	1566.9	-0.01992	1566.9	-0.02238	1566.9	-0.02416	1566.9	-0.02529	1566.9	-0.02635
1567.39	-0.00527	1567.39	-0.0155	1567.39	-0.02002	1567.39	-0.02241	1567.39	-0.02419	1567.39	-0.0253	1567.39	-0.02634
1567.87	-0.00533	1567.87	-0.01561	1567.87	-0.0201	1567.87	-0.02243	1567.87	-0.02417	1567.87	-0.02524	1567.87	-0.02626
1568.35	-0.0054	1568.35	-0.01574	1568.35	-0.0202	1568.35	-0.02248	1568.35	-0.02418	1568.35	-0.02519	1568.35	-0.02617
1568.83	-0.00549	1568.83	-0.01593	1568.83	-0.02036	1568.83	-0.02266	1568.83	-0.0243	1568.83	-0.02524	1568.83	-0.02619
1569.32	-0.00562	1569.32	-0.01619	1569.32	-0.02063	1569.32	-0.02299	1569.32	-0.02459	1569.32	-0.02548	1569.32	-0.0264
1569.8	-0.00577	1569.8	-0.01652	1569.8	-0.02099	1569.8	-0.02348	1569.8	-0.02506	1569.8	-0.02593	1569.8	-0.02685
1570.28	-0.00593	1570.28	-0.01687	1570.28	-0.02141	1570.28	-0.02403	1570.28	-0.02563	1570.28	-0.02652	1570.28	-0.02745
1570.76	-0.00606	1570.76	-0.01719	1570.76	-0.02183	1570.76	-0.02455	1570.76	-0.0262	1570.76	-0.02713	1570.76	-0.0281
1571.24	-0.00617	1571.24	-0.01746	1571.24	-0.02219	1571.24	-0.02496	1571.24	-0.02667	1571.24	-0.02767	1571.24	-0.02867
1571.73	-0.00625	1571.73	-0.01768	1571.73	-0.02248	1571.73	-0.02526	1571.73	-0.02702	1571.73	-0.02808	1571.73	-0.02912
1572.21	-0.00632	1572.21	-0.01785	1572.21	-0.0227	1572.21	-0.02545	1572.21	-0.02725	1572.21	-0.02836	1572.21	-0.02943
1572.69	-0.00638	1572.69	-0.01799	1572.69	-0.02286	1572.69	-0.02554	1572.69	-0.02738	1572.69	-0.02852	1572.69	-0.02961
1573.17	-0.00642	1573.17	-0.01809	1573.17	-0.02296	1573.17	-0.02555	1573.17	-0.0274	1573.17	-0.02855	1573.17	-0.02965
1573.65	-0.00645	1573.65	-0.01815	1573.65	-0.023	1573.65	-0.0255	1573.65	-0.02734	1573.65	-0.02849	1573.65	-0.02957
1574.14	-0.00648	1574.14	-0.01819	1574.14	-0.02299	1574.14	-0.02539	1574.14	-0.02722	1574.14	-0.02833	1574.14	-0.02938
1574.62	-0.00651	1574.62	-0.01822	1574.62	-0.02296	1574.62	-0.02528	1574.62	-0.02707	1574.62	-0.02812	1574.62	-0.02913
1575.1	-0.00655	1575.1	-0.01827	1575.1	-0.02294	1575.1	-0.02522	1575.1	-0.02696	1575.1	-0.02794	1575.1	-0.0289
1575.58	-0.00662	1575.58	-0.01838	1575.58	-0.023	1575.58	-0.02531	1575.58	-0.02699	1575.58	-0.0279	1575.58	-0.0288
1576.07	-0.00673	1576.07	-0.01859	1576.07	-0.02319	1576.07	-0.02561	1576.07	-0.02725	1576.07	-0.02811	1576.07	-0.02898
1576.55	-0.00687	1576.55	-0.0189	1576.55	-0.02354	1576.55	-0.02612	1576.55	-0.02775	1576.55	-0.02861	1576.55	-0.02947
1577.03	-0.00701	1577.03	-0.01926	1577.03	-0.02399	1577.03	-0.02675	1577.03	-0.02841	1577.03	-0.02931	1577.03	-0.0302
1577.51	-0.00715	1577.51	-0.01962	1577.51	-0.02449	1577.51	-0.02739	1577.51	-0.0291	1577.51	-0.03009	1577.51	-0.03104
1577.99	-0.00727	1577.99	-0.01997	1577.99	-0.02497	1577.99	-0.02798	1577.99	-0.02976	1577.99	-0.03084	1577.99	-0.03186
1578.48	-0.00738	1578.48	-0.0203	1578.48	-0.02543	1578.48	-0.02851	1578.48	-0.03036	1578.48	-0.03153	1578.48	-0.03262
1578.96	-0.00749	1578.96	-0.02062	1578.96	-0.02588	1578.96	-0.029	1578.96	-0.03091	1578.96	-0.03216	1578.96	-0.03332
1579.44	-0.00759	1579.44	-0.02095	1579.44	-0.02633	1579.44	-0.02947	1579.44	-0.03144	1579.44	-0.03276	1579.44	-0.03397
1579.92	-0.00771	1579.92	-0.02132	1579.92	-0.0268	1579.92	-0.02996	1579.92	-0.03197	1579.92	-0.03334	1579.92	-0.0346
1580.4	-0.00784	1580.4	-0.0217	1580.4	-0.02729	1580.4	-0.03046	1580.4	-0.03251	1580.4	-0.03393	1580.4	-0.03522
1580.89	-0.00797	1580.89	-0.02211	1580.89	-0.02779	1580.89	-0.03098	1580.89	-0.03306	1580.89	-0.03452	1580.89	-0.03583
1581.37	-0.00811	1581.37	-0.02252	1581.37	-0.02829	1581.37	-0.0315	1581.37	-0.03361	1581.37	-0.03509	1581.37	-0.03642
1581.85	-0.00825	1581.85	-0.02291	1581.85	-0.02876	1581.85	-0.032	1581.85	-0.03413	1581.85	-0.03564	1581.85	-0.03697
1582.33	-0.00837	1582.33	-0.02327	1582.33	-0.0292	1582.33	-0.03247	1582.33	-0.03462	1582.33	-0.03614	1582.33	-0.03748
1582.82	-0.00848	1582.82	-0.0236	1582.82	-0.02959	1582.82	-0.03288	1582.82	-0.03506	1582.82	-0.03659	1582.82	-0.03794
1583.3	-0.00859	1583.3	-0.02389	1583.3	-0.02994	1583.3	-0.03325	1583.3	-0.03545	1583.3	-0.03698	1583.3	-0.03835
1583.78	-0.00868	1583.78	-0.02415	1583.78	-0.03024	1583.78	-0.03357	1583.78	-0.03579	1583.78	-0.03733	1583.78	-0.03871
1584.26	-0.00875	1584.26	-0.02437	1584.26	-0.0305	1584.26	-0.03385	1584.26	-0.03608	1584.26	-0.03763	1584.26	-0.03902
1584.74	-0.00882	1584.74	-0.02455	1584.74	-0.03071	1584.74	-0.03407	1584.74	-0.03631	1584.74	-0.03786	1584.74	-0.03926
1585.23	-0.00887	1585.23	-0.02469	1585.23	-0.03087	1585.23	-0.03423	1585.23	-0.03648	1585.23	-0.03803	1585.23	-0.03944
1585.71	-0.0089	1585.71	-0.02477	1585.71	-0.03096	1585.71	-0.03433	1585.71	-0.03657	1585.71	-0.03813	1585.71	-0.03954
1586.19	-0.00892	1586.19	-0.02481	1586.19	-0.031	1586.19	-0.03436	1586.19	-0.03659	1586.19	-0.03816	1586.19	-0.03957
1586.67	-0.00893	1586.67	-0.02481	1586.67	-0.03098	1586.67	-0.03433	1586.67	-0.03655	1586.67	-0.03812	1586.67	-0.03953
1587.15	-0.00893	1587.15	-0.02477	1587.15	-0.03092	1587.15	-0.03425	1587.15	-0.03645	1587.15	-0.03801	1587.15	-0.03942
1587.64	-0.00892	1587.64	-0.0247	1587.64	-0.03081	1587.64	-0.0341	1587.64	-0.0363	1587.64	-0.03784	1587.64	-0.03923
1588.12	-0.00891	1588.12	-0.0246	1588.12	-0.03064	1588.12	-0.03391	1588.12	-0.03608	1588.12	-0.0376	1588.12	-0.03898
1588.6	-0.00888	1588.6	-0.02445	1588.6	-0.03043	1588.6	-0.03365	1588.6	-0.0358	1588.6	-0.03729	1588.6	-0.03865
1589.08	-0.00884	1589.08	-0.02426	1589.08	-0.03015	1589.08	-0.03332	1589.08	-0.03546	1589.08	-0.03691	1589.08	-0.03824
1589.57	-0.00879	1589.57	-0.02402	1589.57	-0.02982	1589.57	-0.03294	1589.57	-0.03505	1589.57	-0.03647	1589.57	-0.03778
1590.05	-0.00873	1590.05	-0.02375	1590.05	-0.02945	1590.05	-0.03252	1590.05	-0.0346	1590.05	-0.03597	1590.05	-0.03726
1590.53	-0.00867	1590.53	-0.02344	1590.53	-0.02903	1590.53	-0.03205	1590.53	-0.0341	1590.53	-0.03544	1590.53	-0.03671
1591.01	-0.00859	1591.01	-0.02312	1591.01	-0.0286	1591.01	-0.03156	1591.01	-0.03358	1591.01	-0.03489	1591.01	-0.03614
1591.49	-0.00852	1591.49	-0.02278	1591.49	-0.02814	1591.49	-0.03105	1591.49	-0.03303	1591.49	-0.03431	1591.49	-0.03555
1591.98	-0.00843	1591.98	-0.02243	1591.98	-0.02767	1591.98	-0.03053	1591.98	-0.03246	1591.98	-0.03372	1591.98	-0.03493
1592.46	-0.00834	1592.46	-0.02206	1592.46	-0.02719	1592.46	-0.02999	1592.46	-0.03188	1592.46	-0.03311	1592.46	-0.03429
1592.94	-0.00824	1592.94	-0.02169	1592.94	-0.02671	1592.94	-0.02943	1592.94	-0.03128	1592.94	-0.03248	1592.94	-0.03363
1593.42	-0.00814	1593.42	-0.02131	1593.42	-0.02622	1593.42	-0.02888	1593.42	-0.03068	1593.42	-0.03186	1593.42	-0.03297
1593.9	-0.00803	1593.9	-0.02095	1593.9	-0.02575	1593.9	-0.02835	1593.9	-0.03011	1593.9	-0.03125	1593.9	-0.03233
1594.39	-0.00793	1594.39	-0.02061	1594.39	-0.02533	1594.39	-0.02787	1594.39	-0.02958	1594.39	-0.03071	1594.39	-0.03174
1594.87	-0.00783	1594.87	-0.02032	1594.87	-0.02496	1594.87	-0.02745	1594.87	-0.02913	1594.87	-0.03024	1594.87	-0.03124
1595.35	-0.00775	1595.35	-0.02008	1595.35	-0.02467	1595.35	-0.02713	1595.35	-0.02878	1595.35	-0.02987	1595.35	-0.03085
1595.83	-0.00769	1595.83	-0.01993	1595.83	-0.02447	1595.83	-0.02691	1595.83	-0.02854	1595.83	-0.02963	1595.83	-0.03058
1596.32	-0.00765	1596.32	-0.01984	1596.32	-0.02436	1596.32	-0.02679	1596.32	-0.02842	1596.32	-0.0295	1596.32	-0.03045
1596.8	-0.00763	1596.8	-0.01983	1596.8	-0.02435	1596.8	-0.02678	1596.8	-0.0284	1596.8	-0.02949	1596.8	-0.03043
1597.28	-0.00763	1597.28	-0.01989	1597.28	-0.02443	1597.28	-0.02686	1597.28	-0.02847	1597.28	-0.02957	1597.28	-0.03051
1597.76	-0.00765	1597.76	-0.02	1597.76	-0.02457	1597.76	-0.027	1597.76	-0.02862	1597.76	-0.02972	1597.76	-0.03067
1598.24	-0.00769	1598.24	-0.02016	1598.24	-0.02478	1598.24	-0.02721	1598.24	-0.02884	1598.24	-0.02994	1598.24	-0.03089
1598.72	-0.00774	1598.72	-0.02036	1598.72	-0.02503	1598.72	-0.02745	1598.72	-0.02909	1598.72	-0.03018	1598.72	-0.03114
1599.21	-0.0078	1599.21	-0.02057	1599.21	-0.0253	1599.21	-0.02772	1599.21	-0.02936	1599.21	-0.03044	1599.21	-0.0314
1599.69	-0.00786	1599.69	-0.02079	1599.69	-0.02557	1599.69	-0.02798	1599.69	-0.02962	1599.69	-0.03069	1599.69	-0.03164
1600.17	-0.00792	1600.17	-0.02099	1600.17	-0.02582	1600.17	-0.02823	1600.17	-0.02986	1600.17	-0.03092	1600.17	-0.03185
1600.65	-0.00796	1600.65	-0.02116	1600.65	-0.02603	1600.65	-0.02843	1600.65	-0.03006	1600.65	-0.03109	1600.65	-0.03202
1601.14	-0.00799	1601.14	-0.02128	1601.14	-0.02618	1601.14	-0.02858	1601.14	-0.0302	1601.14	-0.03122	1601.14	-0.03213
1601.62	-0.008	1601.62	-0.02136	1601.62	-0.02626	1601.62	-0.02867	1601.62	-0.03029	1601.62	-0.03128	1601.62	-0.03219
1602.1	-0.00799	1602.1	-0.02138	1602.1	-0.02628	1602.1	-0.0287	1602.1	-0.03031	1602.1	-0.03129	1602.1	-0.0322
1602.58	-0.00796	1602.58	-0.02135	1602.58	-0.02624	1602.58	-0.02867	1602.58	-0.03029	1602.58	-0.03125	1602.58	-0.03217
1603.06	-0.00791	1603.06	-0.02128	1603.06	-0.02615	1603.06	-0.0286	1603.06	-0.03021	1603.06	-0.03117	1603.06	-0.03209
1603.55	-0.00785	1603.55	-0.02116	1603.55	-0.02602	1603.55	-0.02848	1603.55	-0.03008	1603.55	-0.03104	1603.55	-0.03197
1604.03	-0.00778	1604.03	-0.02101	1604.03	-0.02584	1604.03	-0.02831	1604.03	-0.0299	1604.03	-0.03086	1604.03	-0.0318
1604.51	-0.0077	1604.51	-0.02083	1604.51	-0.02563	1604.51	-0.02809	1604.51	-0.02967	1604.51	-0.03064	1604.51	-0.03158
1604.99	-0.00761	1604.99	-0.02061	1604.99	-0.02538	1604.99	-0.02782	1604.99	-0.02939	1604.99	-0.03037	1604.99	-0.03131
1605.47	-0.00752	1605.47	-0.02038	1605.47	-0.0251	1605.47	-0.02752	1605.47	-0.02907	1605.47	-0.03005	1605.47	-0.03098
1605.96	-0.00742	1605.96	-0.02012	1605.96	-0.0248	1605.96	-0.02718	1605.96	-0.02872	1605.96	-0.02969	1605.96	-0.03061
1606.44	-0.00731	1606.44	-0.01986	1606.44	-0.02448	1606.44	-0.02683	1606.44	-0.02834	1606.44	-0.0293	1606.44	-0.03021
1606.92	-0.00721	1606.92	-0.0196	1606.92	-0.02416	1606.92	-0.02646	1606.92	-0.02796	1606.92	-0.0289	1606.92	-0.02979
1607.4	-0.00711	1607.4	-0.01933	1607.4	-0.02383	1607.4	-0.02611	1607.4	-0.02758	1607.4	-0.0285	1607.4	-0.02937
1607.89	-0.00702	1607.89	-0.01906	1607.89	-0.0235	1607.89	-0.02576	1607.89	-0.02722	1607.89	-0.02811	1607.89	-0.02897
1608.37	-0.00693	1608.37	-0.0188	1608.37	-0.02319	1608.37	-0.02544	1608.37	-0.02689	1608.37	-0.02776	1608.37	-0.02862
1608.85	-0.00684	1608.85	-0.01855	1608.85	-0.0229	1608.85	-0.02514	1608.85	-0.02658	1608.85	-0.02745	1608.85	-0.0283
1609.33	-0.00675	1609.33	-0.01831	1609.33	-0.02261	1609.33	-0.02485	1609.33	-0.0263	1609.33	-0.02717	1609.33	-0.02803
1609.81	-0.00666	1609.81	-0.01807	1609.81	-0.02234	1609.81	-0.02457	1609.81	-0.02603	1609.81	-0.02691	1609.81	-0.02778
1610.3	-0.00657	1610.3	-0.01782	1610.3	-0.02206	1610.3	-0.02429	1610.3	-0.02576	1610.3	-0.02665	1610.3	-0.02753
1610.78	-0.00648	1610.78	-0.01756	1610.78	-0.02177	1610.78	-0.02398	1610.78	-0.02546	1610.78	-0.02637	1610.78	-0.02726
1611.26	-0.00638	1611.26	-0.01728	1611.26	-0.02144	1611.26	-0.02365	1611.26	-0.02513	1611.26	-0.02605	1611.26	-0.02694
1611.74	-0.00628	1611.74	-0.01698	1611.74	-0.02109	1611.74	-0.02326	1611.74	-0.02474	1611.74	-0.02568	1611.74	-0.02658
1612.22	-0.00617	1612.22	-0.01667	1612.22	-0.02071	1612.22	-0.02284	1612.22	-0.02431	1612.22	-0.02526	1612.22	-0.02615
1612.71	-0.00606	1612.71	-0.01634	1612.71	-0.0203	1612.71	-0.02236	1612.71	-0.02382	1612.71	-0.02477	1612.71	-0.02565
1613.19	-0.00594	1613.19	-0.01599	1613.19	-0.01987	1613.19	-0.02185	1613.19	-0.02328	1613.19	-0.02423	1613.19	-0.02509
1613.67	-0.00582	1613.67	-0.01564	1613.67	-0.0194	1613.67	-0.02128	1613.67	-0.02269	1613.67	-0.02361	1613.67	-0.02445
1614.15	-0.00569	1614.15	-0.01525	1614.15	-0.01889	1614.15	-0.02065	1614.15	-0.02202	1614.15	-0.02291	1614.15	-0.02372
1614.63	-0.00554	1614.63	-0.01483	1614.63	-0.01832	1614.63	-0.01996	1614.63	-0.02128	1614.63	-0.02212	1614.63	-0.02288
1615.12	-0.00538	1615.12	-0.01434	1615.12	-0.01767	1615.12	-0.0192	1615.12	-0.02046	1615.12	-0.02122	1615.12	-0.02192
1615.6	-0.0052	1615.6	-0.01378	1615.6	-0.01693	1615.6	-0.0184	1615.6	-0.01957	1615.6	-0.02024	1615.6	-0.02088
1616.08	-0.005	1616.08	-0.01317	1616.08	-0.01615	1616.08	-0.0176	1616.08	-0.01868	1616.08	-0.01927	1616.08	-0.01985
1616.56	-0.00481	1616.56	-0.01256	1616.56	-0.0154	1616.56	-0.01689	1616.56	-0.0179	1616.56	-0.01843	1616.56	-0.01897
1617.05	-0.00464	1617.05	-0.01202	1617.05	-0.01478	1617.05	-0.01635	1617.05	-0.01731	1617.05	-0.01781	1617.05	-0.01834
1617.53	-0.0045	1617.53	-0.0116	1617.53	-0.01433	1617.53	-0.01597	1617.53	-0.01692	1617.53	-0.01744	1617.53	-0.01799
1618.01	-0.0044	1618.01	-0.01129	1618.01	-0.01402	1618.01	-0.01572	1618.01	-0.01668	1618.01	-0.01725	1618.01	-0.01783
1618.49	-0.00432	1618.49	-0.01106	1618.49	-0.01381	1618.49	-0.01551	1618.49	-0.0165	1618.49	-0.01712	1618.49	-0.01774
1618.97	-0.00425	1618.97	-0.01087	1618.97	-0.01363	1618.97	-0.01531	1618.97	-0.01633	1618.97	-0.017	1618.97	-0.01765
1619.46	-0.00418	1619.46	-0.0107	1619.46	-0.01345	1619.46	-0.01507	1619.46	-0.01611	1619.46	-0.01682	1619.46	-0.0175
1619.94	-0.00411	1619.94	-0.01052	1619.94	-0.01324	1619.94	-0.01479	1619.94	-0.01585	1619.94	-0.01657	1619.94	-0.01727
1620.42	-0.00403	1620.42	-0.01032	1620.42	-0.013	1620.42	-0.01446	1620.42	-0.01552	1620.42	-0.01623	1620.42	-0.01694
1620.9	-0.00395	1620.9	-0.0101	1620.9	-0.01271	1620.9	-0.01408	1620.9	-0.01513	1620.9	-0.01581	1620.9	-0.01651
1621.38	-0.00386	1621.38	-0.00987	1621.38	-0.01238	1621.38	-0.01367	1621.38	-0.01469	1621.38	-0.01532	1621.38	-0.016
1621.87	-0.00377	1621.87	-0.00961	1621.87	-0.01203	1621.87	-0.01325	1621.87	-0.01423	1621.87	-0.01481	1621.87	-0.01545
1622.35	-0.00368	1622.35	-0.00937	1622.35	-0.01168	1622.35	-0.01287	1622.35	-0.01381	1622.35	-0.01432	1622.35	-0.01492
1622.83	-0.0036	1622.83	-0.00915	1622.83	-0.01138	1622.83	-0.01259	1622.83	-0.01348	1622.83	-0.01394	1622.83	-0.0145
1623.31	-0.00355	1623.31	-0.00898	1623.31	-0.01117	1623.31	-0.01242	1623.31	-0.01329	1623.31	-0.01372	1623.31	-0.01425
1623.8	-0.00351	1623.8	-0.00887	1623.8	-0.01106	1623.8	-0.01237	1623.8	-0.01323	1623.8	-0.01367	1623.8	-0.01417
1624.28	-0.00349	1624.28	-0.0088	1624.28	-0.01102	1624.28	-0.01238	1624.28	-0.01325	1624.28	-0.01372	1624.28	-0.01423
1624.76	-0.00348	1624.76	-0.00877	1624.76	-0.01101	1624.76	-0.0124	1624.76	-0.0133	1624.76	-0.01381	1624.76	-0.01433
1625.24	-0.00347	1625.24	-0.00874	1625.24	-0.01102	1625.24	-0.0124	1625.24	-0.01333	1625.24	-0.01387	1625.24	-0.01441
1625.72	-0.00345	1625.72	-0.00871	1625.72	-0.011	1625.72	-0.01237	1625.72	-0.01331	1625.72	-0.01388	1625.72	-0.01443
1626.21	-0.00343	1626.21	-0.00868	1626.21	-0.01098	1626.21	-0.01231	1626.21	-0.01325	1626.21	-0.01383	1626.21	-0.01439
1626.69	-0.00341	1626.69	-0.00865	1626.69	-0.01094	1626.69	-0.01224	1626.69	-0.01319	1626.69	-0.01376	1626.69	-0.01432
1627.17	-0.00339	1627.17	-0.00863	1627.17	-0.01091	1627.17	-0.0122	1627.17	-0.01314	1627.17	-0.0137	1627.17	-0.01427
1627.65	-0.00338	1627.65	-0.00863	1627.65	-0.01092	1627.65	-0.01222	1627.65	-0.01315	1627.65	-0.0137	1627.65	-0.01427
1628.13	-0.00338	1628.13	-0.00867	1628.13	-0.01097	1628.13	-0.0123	1628.13	-0.01323	1628.13	-0.01378	1628.13	-0.01435
1628.62	-0.00338	1628.62	-0.00873	1628.62	-0.01105	1628.62	-0.01243	1628.62	-0.01336	1628.62	-0.01392	1628.62	-0.01452
1629.1	-0.00338	1629.1	-0.0088	1629.1	-0.01116	1629.1	-0.01258	1629.1	-0.01353	1629.1	-0.01412	1629.1	-0.01473
1629.58	-0.00338	1629.58	-0.00888	1629.58	-0.01128	1629.58	-0.01272	1629.58	-0.01369	1629.58	-0.01431	1629.58	-0.01495
1630.06	-0.00338	1630.06	-0.00895	1630.06	-0.01139	1630.06	-0.01284	1630.06	-0.01382	1630.06	-0.01447	1630.06	-0.01513
1630.55	-0.00338	1630.55	-0.00901	1630.55	-0.01148	1630.55	-0.01291	1630.55	-0.01391	1630.55	-0.01459	1630.55	-0.01526
1631.03	-0.00338	1631.03	-0.00907	1631.03	-0.01155	1631.03	-0.01294	1631.03	-0.01395	1631.03	-0.01464	1631.03	-0.01532
1631.51	-0.00337	1631.51	-0.00911	1631.51	-0.0116	1631.51	-0.01293	1631.51	-0.01395	1631.51	-0.01464	1631.51	-0.01532
1631.99	-0.00336	1631.99	-0.00913	1631.99	-0.01161	1631.99	-0.01287	1631.99	-0.01389	1631.99	-0.01457	1631.99	-0.01524
1632.47	-0.00335	1632.47	-0.00913	1632.47	-0.0116	1632.47	-0.01276	1632.47	-0.01378	1632.47	-0.01443	1632.47	-0.01509
1632.96	-0.00334	1632.96	-0.0091	1632.96	-0.01154	1632.96	-0.0126	1632.96	-0.0136	1632.96	-0.01421	1632.96	-0.01484
1633.44	-0.00332	1633.44	-0.00905	1633.44	-0.01144	1633.44	-0.01239	1633.44	-0.01336	1633.44	-0.01391	1633.44	-0.0145
1633.92	-0.00329	1633.92	-0.00898	1633.92	-0.01129	1633.92	-0.01213	1633.92	-0.01305	1633.92	-0.01352	1633.92	-0.01405
1634.4	-0.00326	1634.4	-0.0089	1634.4	-0.01112	1634.4	-0.01186	1634.4	-0.01271	1634.4	-0.01308	1634.4	-0.01353
1634.88	-0.00324	1634.88	-0.00884	1634.88	-0.01097	1634.88	-0.01167	1634.88	-0.01242	1634.88	-0.01266	1634.88	-0.01301
1635.37	-0.00324	1635.37	-0.00885	1635.37	-0.01091	1635.37	-0.01164	1635.37	-0.01229	1635.37	-0.01241	1635.37	-0.01266
1635.85	-0.00327	1635.85	-0.00897	1635.85	-0.011	1635.85	-0.01186	1635.85	-0.01244	1635.85	-0.01246	1635.85	-0.01265
1636.33	-0.00332	1636.33	-0.00919	1636.33	-0.01126	1636.33	-0.0123	1636.33	-0.01284	1636.33	-0.01284	1636.33	-0.01302
1636.81	-0.00339	1636.81	-0.00944	1636.81	-0.01161	1636.81	-0.01282	1636.81	-0.01339	1636.81	-0.01342	1636.81	-0.01364
1637.3	-0.00345	1637.3	-0.0097	1637.3	-0.01198	1637.3	-0.01332	1637.3	-0.01395	1637.3	-0.01406	1637.3	-0.01435
1637.78	-0.0035	1637.78	-0.00993	1637.78	-0.01233	1637.78	-0.01375	1637.78	-0.01445	1637.78	-0.01466	1637.78	-0.01503
1638.26	-0.00354	1638.26	-0.01013	1638.26	-0.01264	1638.26	-0.01411	1638.26	-0.01488	1638.26	-0.01518	1638.26	-0.01562
1638.74	-0.00357	1638.74	-0.01031	1638.74	-0.01293	1638.74	-0.01442	1638.74	-0.01525	1638.74	-0.01563	1638.74	-0.01612
1639.22	-0.0036	1639.22	-0.01047	1639.22	-0.01318	1639.22	-0.01469	1639.22	-0.01557	1639.22	-0.01602	1639.22	-0.01655
1639.71	-0.00362	1639.71	-0.01062	1639.71	-0.01341	1639.71	-0.01493	1639.71	-0.01585	1639.71	-0.01636	1639.71	-0.01692
1640.19	-0.00364	1640.19	-0.01075	1640.19	-0.01362	1640.19	-0.01514	1640.19	-0.0161	1640.19	-0.01665	1640.19	-0.01722
1640.67	-0.00366	1640.67	-0.01087	1640.67	-0.01379	1640.67	-0.01532	1640.67	-0.0163	1640.67	-0.01688	1640.67	-0.01747
1641.15	-0.00367	1641.15	-0.01098	1641.15	-0.01394	1641.15	-0.01546	1641.15	-0.01647	1641.15	-0.01707	1641.15	-0.01766
1641.63	-0.00368	1641.63	-0.01106	1641.63	-0.01407	1641.63	-0.01557	1641.63	-0.01659	1641.63	-0.01721	1641.63	-0.0178
1642.12	-0.00369	1642.12	-0.01114	1642.12	-0.01417	1642.12	-0.01564	1642.12	-0.01668	1642.12	-0.0173	1642.12	-0.01789
1642.6	-0.0037	1642.6	-0.01119	1642.6	-0.01424	1642.6	-0.01567	1642.6	-0.01672	1642.6	-0.01733	1642.6	-0.01792
1643.08	-0.0037	1643.08	-0.01123	1643.08	-0.01428	1643.08	-0.01565	1643.08	-0.0167	1643.08	-0.0173	1643.08	-0.01789
1643.56	-0.00369	1643.56	-0.01124	1643.56	-0.01428	1643.56	-0.01557	1643.56	-0.01662	1643.56	-0.01719	1643.56	-0.01776
1644.05	-0.00368	1644.05	-0.01121	1644.05	-0.01421	1644.05	-0.01542	1644.05	-0.01644	1644.05	-0.01696	1644.05	-0.01751
1644.53	-0.00365	1644.53	-0.01114	1644.53	-0.01407	1644.53	-0.01517	1644.53	-0.01615	1644.53	-0.0166	1644.53	-0.01711
1645.01	-0.00361	1645.01	-0.01102	1645.01	-0.01386	1645.01	-0.01484	1645.01	-0.01577	1645.01	-0.01611	1645.01	-0.01655
1645.49	-0.00355	1645.49	-0.01088	1645.49	-0.01359	1645.49	-0.01447	1645.49	-0.01531	1645.49	-0.01552	1645.49	-0.01588
1645.97	-0.00349	1645.97	-0.01074	1645.97	-0.01332	1645.97	-0.01415	1645.97	-0.01489	1645.97	-0.01494	1645.97	-0.0152
1646.46	-0.00344	1646.46	-0.01065	1646.46	-0.01314	1646.46	-0.014	1646.46	-0.01464	1646.46	-0.01455	1646.46	-0.01472
1646.94	-0.00341	1646.94	-0.01065	1646.94	-0.01314	1646.94	-0.0141	1646.94	-0.01468	1646.94	-0.01452	1646.94	-0.01462
1647.42	-0.00341	1647.42	-0.01075	1647.42	-0.0133	1647.42	-0.01443	1647.42	-0.015	1647.42	-0.01485	1647.42	-0.01494
1647.9	-0.00342	1647.9	-0.01089	1647.9	-0.01356	1647.9	-0.01485	1647.9	-0.01546	1647.9	-0.01538	1647.9	-0.01551
1648.38	-0.00344	1648.38	-0.01101	1648.38	-0.01382	1648.38	-0.01521	1648.38	-0.01588	1648.38	-0.01591	1648.38	-0.01611
1648.87	-0.00345	1648.87	-0.0111	1648.87	-0.01402	1648.87	-0.01543	1648.87	-0.01618	1648.87	-0.01632	1648.87	-0.01659
1649.35	-0.00344	1649.35	-0.01114	1649.35	-0.01414	1649.35	-0.01552	1649.35	-0.01632	1649.35	-0.01656	1649.35	-0.01689
1649.83	-0.00343	1649.83	-0.01114	1649.83	-0.01418	1649.83	-0.01547	1649.83	-0.01632	1649.83	-0.01663	1649.83	-0.01701
1650.31	-0.00341	1650.31	-0.01109	1650.31	-0.01414	1650.31	-0.0153	1650.31	-0.01619	1650.31	-0.01653	1650.31	-0.01696
1650.8	-0.00338	1650.8	-0.01098	1650.8	-0.01402	1650.8	-0.01502	1650.8	-0.01591	1650.8	-0.01626	1650.8	-0.01672
1651.28	-0.00333	1651.28	-0.01081	1651.28	-0.01377	1651.28	-0.01461	1651.28	-0.01548	1651.28	-0.0158	1651.28	-0.01625
1651.76	-0.00326	1651.76	-0.01055	1651.76	-0.01337	1651.76	-0.01405	1651.76	-0.01485	1651.76	-0.01508	1651.76	-0.0155
1652.24	-0.00317	1652.24	-0.01017	1652.24	-0.01279	1652.24	-0.01337	1652.24	-0.01404	1652.24	-0.01413	1652.24	-0.01447
1652.72	-0.00306	1652.72	-0.00971	1652.72	-0.0121	1652.72	-0.01271	1652.72	-0.0132	1652.72	-0.0131	1652.72	-0.01331
1653.2	-0.00296	1653.2	-0.00932	1653.2	-0.01154	1653.2	-0.01233	1653.2	-0.01267	1653.2	-0.01241	1653.2	-0.01249
1653.69	-0.00291	1653.69	-0.00914	1653.69	-0.01132	1653.69	-0.01239	1653.69	-0.01267	1653.69	-0.01234	1653.69	-0.01235
1654.17	-0.0029	1654.17	-0.00915	1654.17	-0.01143	1654.17	-0.01272	1654.17	-0.01304	1654.17	-0.01277	1654.17	-0.01278
1654.65	-0.0029	1654.65	-0.00925	1654.65	-0.01165	1654.65	-0.01308	1654.65	-0.01349	1654.65	-0.01333	1654.65	-0.0134
1655.13	-0.0029	1655.13	-0.00933	1655.13	-0.01186	1655.13	-0.01334	1655.13	-0.01384	1655.13	-0.01382	1655.13	-0.01395
1655.62	-0.00289	1655.62	-0.00937	1655.62	-0.01199	1655.62	-0.01348	1655.62	-0.01406	1655.62	-0.01415	1655.62	-0.01435
1656.1	-0.00287	1656.1	-0.00934	1656.1	-0.01203	1656.1	-0.0135	1656.1	-0.01414	1656.1	-0.01433	1656.1	-0.01459
1656.58	-0.00284	1656.58	-0.00927	1656.58	-0.01199	1656.58	-0.01343	1656.58	-0.01411	1656.58	-0.01438	1656.58	-0.01469
1657.06	-0.0028	1657.06	-0.00915	1657.06	-0.01188	1657.06	-0.01329	1657.06	-0.014	1657.06	-0.01433	1657.06	-0.01467
1657.54	-0.00275	1657.54	-0.009	1657.54	-0.01173	1657.54	-0.01309	1657.54	-0.01381	1657.54	-0.01418	1657.54	-0.01454
1658.03	-0.0027	1658.03	-0.00883	1658.03	-0.01153	1658.03	-0.01284	1658.03	-0.01356	1658.03	-0.01396	1658.03	-0.01433
1658.51	-0.00264	1658.51	-0.00863	1658.51	-0.0113	1658.51	-0.01255	1658.51	-0.01326	1658.51	-0.01367	1658.51	-0.01404
1658.99	-0.00257	1658.99	-0.00843	1658.99	-0.01104	1658.99	-0.01222	1658.99	-0.01291	1658.99	-0.01331	1658.99	-0.01367
1659.47	-0.00251	1659.47	-0.0082	1659.47	-0.01074	1659.47	-0.01184	1659.47	-0.01251	1659.47	-0.01289	1659.47	-0.01323
1659.95	-0.00244	1659.95	-0.00796	1659.95	-0.0104	1659.95	-0.01142	1659.95	-0.01205	1659.95	-0.01239	1659.95	-0.01271
1660.44	-0.00237	1660.44	-0.0077	1660.44	-0.01003	1660.44	-0.01095	1660.44	-0.01155	1660.44	-0.01184	1660.44	-0.01212
1660.92	-0.00229	1660.92	-0.00742	1660.92	-0.00963	1660.92	-0.01046	1660.92	-0.01101	1660.92	-0.01124	1660.92	-0.01147
1661.4	-0.00222	1661.4	-0.00713	1661.4	-0.0092	1661.4	-0.00997	1661.4	-0.01046	1661.4	-0.01062	1661.4	-0.0108
1661.88	-0.00214	1661.88	-0.00684	1661.88	-0.00877	1661.88	-0.0095	1661.88	-0.00994	1661.88	-0.01003	1661.88	-0.01016
1662.37	-0.00207	1662.37	-0.00657	1662.37	-0.00838	1662.37	-0.00912	1662.37	-0.00952	1662.37	-0.00954	1662.37	-0.00962
1662.85	-0.00201	1662.85	-0.00634	1662.85	-0.00807	1662.85	-0.00884	1662.85	-0.00921	1662.85	-0.00919	1662.85	-0.00925
1663.33	-0.00196	1663.33	-0.00615	1663.33	-0.00784	1663.33	-0.00866	1663.33	-0.00903	1663.33	-0.009	1663.33	-0.00905
1663.81	-0.00192	1663.81	-0.00601	1663.81	-0.00768	1663.81	-0.00854	1663.81	-0.00893	1663.81	-0.00891	1663.81	-0.00897
1664.29	-0.00188	1664.29	-0.0059	1664.29	-0.00757	1664.29	-0.00844	1664.29	-0.00884	1664.29	-0.00885	1664.29	-0.00894
1664.78	-0.00185	1664.78	-0.00579	1664.78	-0.00746	1664.78	-0.00831	1664.78	-0.00873	1664.78	-0.00876	1664.78	-0.00888
1665.26	-0.00181	1665.26	-0.00569	1665.26	-0.00735	1665.26	-0.00813	1665.26	-0.00856	1665.26	-0.00862	1665.26	-0.00876
1665.74	-0.00177	1665.74	-0.00558	1665.74	-0.00721	1665.74	-0.0079	1665.74	-0.00833	1665.74	-0.00839	1665.74	-0.00854
1666.22	-0.00174	1666.22	-0.00545	1666.22	-0.00703	1666.22	-0.00762	1666.22	-0.00803	1666.22	-0.00808	1666.22	-0.00822
1666.7	-0.0017	1666.7	-0.00531	1666.7	-0.00682	1666.7	-0.00729	1666.7	-0.00767	1666.7	-0.00769	1666.7	-0.00781
1667.19	-0.00165	1667.19	-0.00515	1667.19	-0.00657	1667.19	-0.00692	1667.19	-0.00725	1667.19	-0.00722	1667.19	-0.0073
1667.67	-0.00161	1667.67	-0.00498	1667.67	-0.00629	1667.67	-0.00653	1667.67	-0.00679	1667.67	-0.0067	1667.67	-0.00672
1668.15	-0.00157	1668.15	-0.00479	1668.15	-0.00599	1668.15	-0.00613	1668.15	-0.00633	1668.15	-0.00616	1668.15	-0.00612
1668.63	-0.00153	1668.63	-0.00462	1668.63	-0.00571	1668.63	-0.0058	1668.63	-0.00592	1668.63	-0.00566	1668.63	-0.00556
1669.12	-0.0015	1669.12	-0.00449	1669.12	-0.00549	1669.12	-0.00558	1669.12	-0.00564	1669.12	-0.0053	1669.12	-0.00515
1669.6	-0.0015	1669.6	-0.00442	1669.6	-0.00537	1669.6	-0.00551	1669.6	-0.00553	1669.6	-0.00514	1669.6	-0.00496
1670.08	-0.00151	1670.08	-0.00443	1670.08	-0.00538	1670.08	-0.00561	1670.08	-0.00561	1670.08	-0.0052	1670.08	-0.00503
1670.56	-0.00154	1670.56	-0.0045	1670.56	-0.00548	1670.56	-0.00582	1670.56	-0.00584	1670.56	-0.00544	1670.56	-0.0053
1671.04	-0.00158	1671.04	-0.0046	1671.04	-0.00564	1671.04	-0.00606	1671.04	-0.00611	1671.04	-0.00577	1671.04	-0.00567
1671.53	-0.00161	1671.53	-0.00471	1671.53	-0.0058	1671.53	-0.00627	1671.53	-0.00637	1671.53	-0.00609	1671.53	-0.00604
1672.01	-0.00164	1672.01	-0.00479	1672.01	-0.00593	1672.01	-0.00642	1672.01	-0.00656	1672.01	-0.00634	1672.01	-0.00634
1672.49	-0.00166	1672.49	-0.00486	1672.49	-0.00602	1672.49	-0.00649	1672.49	-0.00667	1672.49	-0.0065	1672.49	-0.00653
1672.97	-0.00168	1672.97	-0.0049	1672.97	-0.00607	1672.97	-0.0065	1672.97	-0.00671	1672.97	-0.00658	1672.97	-0.00663
1673.45	-0.0017	1673.45	-0.00493	1673.45	-0.0061	1673.45	-0.00648	1673.45	-0.00671	1673.45	-0.0066	1673.45	-0.00665
1673.94	-0.00172	1673.94	-0.00497	1673.94	-0.00613	1673.94	-0.00649	1673.94	-0.00672	1673.94	-0.00661	1673.94	-0.00666
1674.42	-0.00175	1674.42	-0.00504	1674.42	-0.00618	1674.42	-0.00656	1674.42	-0.00678	1674.42	-0.00666	1674.42	-0.0067
1674.9	-0.00178	1674.9	-0.00514	1674.9	-0.00628	1674.9	-0.00672	1674.9	-0.00694	1674.9	-0.00681	1674.9	-0.00684
1675.38	-0.00183	1675.38	-0.00527	1675.38	-0.00643	1675.38	-0.00697	1675.38	-0.00719	1675.38	-0.00707	1675.38	-0.00709
1675.87	-0.00187	1675.87	-0.0054	1675.87	-0.00662	1675.87	-0.00723	1675.87	-0.00747	1675.87	-0.00738	1675.87	-0.00741
1676.35	-0.00191	1676.35	-0.00553	1676.35	-0.00679	1676.35	-0.00746	1676.35	-0.00772	1676.35	-0.00767	1676.35	-0.00772
1676.83	-0.00193	1676.83	-0.00562	1676.83	-0.00694	1676.83	-0.00761	1676.83	-0.0079	1676.83	-0.0079	1676.83	-0.00797
1677.31	-0.00195	1677.31	-0.00569	1677.31	-0.00704	1677.31	-0.00768	1677.31	-0.00799	1677.31	-0.00802	1677.31	-0.00812
1677.79	-0.00196	1677.79	-0.00573	1677.79	-0.0071	1677.79	-0.00768	1677.79	-0.00801	1677.79	-0.00805	1677.79	-0.00816
1678.28	-0.00197	1678.28	-0.00575	1678.28	-0.00711	1678.28	-0.00763	1678.28	-0.00796	1678.28	-0.008	1678.28	-0.0081
1678.76	-0.00197	1678.76	-0.00576	1678.76	-0.0071	1678.76	-0.00754	1678.76	-0.00786	1678.76	-0.00788	1678.76	-0.00798
1679.24	-0.00197	1679.24	-0.00576	1679.24	-0.00706	1679.24	-0.00744	1679.24	-0.00774	1679.24	-0.00772	1679.24	-0.00779
1679.72	-0.00197	1679.72	-0.00575	1679.72	-0.00701	1679.72	-0.00732	1679.72	-0.00759	1679.72	-0.00752	1679.72	-0.00758
1680.2	-0.00196	1680.2	-0.00572	1680.2	-0.00694	1680.2	-0.00718	1680.2	-0.00743	1680.2	-0.00731	1680.2	-0.00735
1680.69	-0.00194	1680.69	-0.00569	1680.69	-0.00686	1680.69	-0.00703	1680.69	-0.00725	1680.69	-0.00709	1680.69	-0.00711
1681.17	-0.00192	1681.17	-0.00564	1681.17	-0.00676	1681.17	-0.00684	1681.17	-0.00704	1681.17	-0.00684	1681.17	-0.00684
1681.65	-0.00188	1681.65	-0.00557	1681.65	-0.00663	1681.65	-0.0066	1681.65	-0.00678	1681.65	-0.00654	1681.65	-0.00652
1682.13	-0.00184	1682.13	-0.00546	1682.13	-0.00645	1682.13	-0.00631	1682.13	-0.00645	1682.13	-0.00615	1682.13	-0.00611
1682.62	-0.00179	1682.62	-0.00532	1682.62	-0.00621	1682.62	-0.00596	1682.62	-0.00605	1682.62	-0.00568	1682.62	-0.00558
1683.1	-0.00174	1683.1	-0.00516	1683.1	-0.00593	1683.1	-0.00562	1683.1	-0.00564	1683.1	-0.00516	1683.1	-0.00499
1683.58	-0.0017	1683.58	-0.00502	1683.58	-0.00568	1683.58	-0.0054	1683.58	-0.00532	1683.58	-0.00473	1683.58	-0.00448
1684.06	-0.00168	1684.06	-0.00495	1684.06	-0.00555	1684.06	-0.00543	1684.06	-0.00527	1684.06	-0.00461	1684.06	-0.00428
1684.54	-0.00169	1684.54	-0.005	1684.54	-0.00561	1684.54	-0.00572	1684.54	-0.00553	1684.54	-0.00487	1684.54	-0.00452
1685.03	-0.00171	1685.03	-0.00513	1685.03	-0.00583	1685.03	-0.00613	1685.03	-0.00596	1685.03	-0.00538	1685.03	-0.00505
1685.51	-0.00174	1685.51	-0.00527	1685.51	-0.00607	1685.51	-0.0065	1685.51	-0.00637	1685.51	-0.0059	1685.51	-0.00563
1685.99	-0.00175	1685.99	-0.00537	1685.99	-0.00627	1685.99	-0.00673	1685.99	-0.00666	1685.99	-0.00629	1685.99	-0.00609
1686.47	-0.00175	1686.47	-0.00541	1686.47	-0.00638	1686.47	-0.00681	1686.47	-0.00679	1686.47	-0.00651	1686.47	-0.00636
1686.95	-0.00173	1686.95	-0.0054	1686.95	-0.0064	1686.95	-0.00679	1686.95	-0.0068	1686.95	-0.00658	1686.95	-0.00647
1687.44	-0.00169	1687.44	-0.00533	1687.44	-0.00636	1687.44	-0.00667	1687.44	-0.00671	1687.44	-0.00653	1687.44	-0.00644
1687.92	-0.00165	1687.92	-0.00523	1687.92	-0.00625	1687.92	-0.00651	1687.92	-0.00657	1687.92	-0.0064	1687.92	-0.00634
1688.4	-0.0016	1688.4	-0.0051	1688.4	-0.00612	1688.4	-0.00634	1688.4	-0.00641	1688.4	-0.00625	1688.4	-0.00619
1688.88	-0.00155	1688.88	-0.00496	1688.88	-0.00598	1688.88	-0.00619	1688.88	-0.00627	1688.88	-0.00612	1688.88	-0.00607

## Sheet: Fig. 3b
Time (h)	Cyclic CO2 loading (mmol g-1)
0.01667	0
0.03333	0.00426
0.05	0.01279
0.06667	0.02132
0.08333	0.02984
0.1	0.03837
0.11667	0.04701
0.13333	0.05565
0.15	0.06429
0.16667	0.07294
0.18333	0.08146
0.2	0.0901
0.21667	0.09886
0.23333	0.10762
0.25	0.11637
0.26667	0.12513
0.28333	0.13389
0.3	0.14264
0.31667	0.1514
0.33333	0.16016
0.35	0.1688
0.36667	0.17744
0.38333	0.1862
0.4	0.19495
0.41667	0.20371
0.43333	0.21247
0.45	0.22123
0.46667	0.22998
0.48333	0.23874
0.5	0.2475
0.51667	0.25625
0.53333	0.26501
0.55	0.27377
0.56667	0.28252
0.58333	0.29128
0.6	0.30004
0.61667	0.30879
0.63333	0.31755
0.65	0.32631
0.66667	0.33506
0.68333	0.34382
0.7	0.35258
0.71667	0.36134
0.73333	0.37009
0.75	0.37885
0.76667	0.38761
0.78333	0.39636
0.8	0.40512
0.81667	0.41388
0.83333	0.42263
0.85	0.43139
0.86667	0.44015
0.88333	0.4489
0.9	0.45766
0.91667	0.46642
0.93333	0.47517
0.95	0.48393
0.96667	0.49269
0.98333	0.50145
1	0.5102
1.01667	0.51896
1.03333	0.52772
1.05	0.53647
1.06667	0.54523
1.08333	0.55399
1.1	0.56274
1.11667	0.5715
1.13333	0.58026
1.15	0.58901
1.16667	0.59777
1.18333	0.60653
1.2	0.61528
1.21667	0.62404
1.23333	0.6328
1.25	0.64155
1.26667	0.65031
1.28333	0.65895
1.3	0.66748
1.31667	0.67601
1.33333	0.68453
1.35	0.69306
1.36667	0.70158
1.38333	0.70999
1.4	0.71829
1.41667	0.72647
1.43333	0.73442
1.45	0.74213
1.46667	0.74967
1.48333	0.7571
1.5	0.76424
1.51667	0.77114
1.53333	0.77793
1.55	0.78426
1.56667	0.79024
1.58333	0.7961
1.6	0.80173
1.61667	0.80701
1.63333	0.81206
1.65	0.81699
1.66667	0.82181
1.68333	0.8264
1.7	0.83075
1.71667	0.83499
1.73333	0.839
1.75	0.84278
1.76667	0.84644
1.78333	0.84987
1.8	0.85308
1.81667	0.85628
1.83333	0.85937
1.85	0.86223
1.86667	0.86497
1.88333	0.86772
1.9	0.87036
1.91667	0.87288
1.93333	0.87529
1.95	0.8776
1.96667	0.87968
1.98333	0.88166
2	0.88375
2.01667	0.88583
2.03333	0.88792
2.05	0.89
2.06667	0.89198
2.08333	0.89386
2.1	0.89563
2.11667	0.8973
2.13333	0.89897
2.15	0.90055
2.16667	0.90202
2.18333	0.9035
2.2	0.90497
2.21667	0.90635
2.23333	0.90764
2.25	0.90902
2.26667	0.91049
2.28333	0.91197
2.3	0.91344
2.31667	0.91492
2.33333	0.9163
2.35	0.91758
2.36667	0.91886
2.38333	0.92015
2.4	0.92133
2.41667	0.92251
2.43333	0.92369
2.45	0.92488
2.46667	0.92616
2.48333	0.92745
2.5	0.92863
2.51667	0.92981
2.53333	0.93109
2.55	0.93238
2.56667	0.93367
2.58333	0.93495
2.6	0.93633
2.61667	0.93771
2.63333	0.939
2.65	0.94028
2.66667	0.94157
2.68333	0.94286
2.7	0.94414
2.71667	0.94542
2.73333	0.9467
2.75	0.94788
2.76667	0.94896
2.78333	0.95004
2.8	0.95112
2.81667	0.9522
2.83333	0.95328
2.85	0.95436
2.86667	0.95544
2.88333	0.95652
2.9	0.9577
2.91667	0.95899
2.93333	0.96027
2.95	0.96145
2.96667	0.96253
2.98333	0.96361
3	0.96468
3.01667	0.96576
3.03333	0.96684
3.05	0.96792
3.06667	0.96887
3.08333	0.96969
3.1	0.97051
3.11667	0.97133
3.13333	0.97216
3.15	0.97269
3.16667	0.97307
3.18333	0.97359
3.2	0.97426
3.21667	0.97494
3.23333	0.97546
3.25	0.97598
3.26667	0.9765
3.28333	0.97702
3.3	0.97769
3.31667	0.97864
3.33333	0.97958
3.35	0.9804
3.36667	0.98107
3.38333	0.98159
3.4	0.98211
3.41667	0.98237
3.43333	0.98248
3.45	0.98286
3.46667	0.98338
3.48333	0.98405
3.5	0.98472
3.51667	0.98524
3.53333	0.98562
3.55	0.98586
3.56667	0.98611
3.58333	0.98622
3.6	0.98621
3.61667	0.98633
3.63333	0.98644
3.65	0.98643
3.66667	0.98654
3.68333	0.98679
3.7	0.9869
3.71667	0.98689
3.73333	0.98701
3.75	0.98725
3.76667	0.98749
3.78333	0.98773
3.8	0.98797
3.81667	0.98835
3.83333	0.98887
3.85	0.98953
3.86667	0.9902
3.88333	0.99058
3.9	0.99082
3.91667	0.9912
3.93333	0.99158
3.95	0.99195
3.96667	0.99262
3.98333	0.99344
4	0.99426
4.01667	0.99507
4.03333	0.99589
4.05	0.99671
4.06667	0.99752
4.08333	0.99834
4.1	0.99915
4.11667	0.99997
4.13333	1.00079
4.15	1.0016
4.16667	1.00242
4.18333	1.00323
4.2	1.00418
4.21667	1.00512
4.23333	1.00594
4.25	1.00675
4.56167	1.00675
4.58333	1.00675
4.60139	1.00675
4.61222	1.00675
4.62028	1.00074
4.62778	0.98014
4.63528	0.95953
4.64722	0.92519
4.65833	0.89085
4.66861	0.85651
4.67417	0.82217
4.67694	0.78783
4.69111	0.71228
4.75556	0.6436
4.76333	0.57492
4.81333	0.50623
4.81806	0.43755
4.82667	0.36887
4.85083	0.30019
4.87778	0.23151
4.90889	0.16283
4.93611	0.12849
4.95056	0.11475
4.97222	0.10102
4.98889	0.09415
5.00556	0.09415
5.02222	0.09854
5.03889	0.10733
5.05556	0.11611
5.07222	0.12489
5.08889	0.13368
5.10556	0.14246
5.12222	0.15124
5.13889	0.16003
5.15556	0.16881
5.17222	0.17759
5.18889	0.18649
5.20556	0.19545
5.22222	0.20441
5.23889	0.21343
5.25556	0.22244
5.27222	0.23145
5.28889	0.24047
5.30556	0.24948
5.32222	0.2585
5.33889	0.26751
5.35556	0.27653
5.37222	0.28543
5.38889	0.29432
5.40556	0.30334
5.42222	0.31235
5.43889	0.32137
5.45556	0.33038
5.47222	0.3394
5.48889	0.34841
5.50556	0.35743
5.52222	0.36644
5.53889	0.37545
5.55556	0.38447
5.57222	0.39348
5.58889	0.4025
5.60556	0.41151
5.62222	0.42053
5.63889	0.42954
5.65556	0.43856
5.67222	0.44757
5.68889	0.45658
5.70556	0.4656
5.72222	0.47461
5.73889	0.48363
5.75556	0.49264
5.77222	0.50166
5.78889	0.51067
5.80556	0.51969
5.82222	0.5287
5.83889	0.53771
5.85556	0.54673
5.87222	0.55574
5.88889	0.56476
5.90556	0.57377
5.92222	0.58279
5.93889	0.5918
5.95556	0.60082
5.97222	0.60983
5.98889	0.61884
6.00556	0.62786
6.02222	0.63687
6.03889	0.64589
6.05556	0.6549
6.07222	0.66392
6.08889	0.67293
6.10556	0.68183
6.12222	0.69061
6.13889	0.6994
6.15556	0.70818
6.17222	0.71696
6.18889	0.72575
6.20556	0.73453
6.22222	0.74332
6.23889	0.7521
6.25556	0.76088
6.27222	0.76955
6.28889	0.7781
6.30556	0.78666
6.32222	0.79509
6.33889	0.80341
6.35556	0.81173
6.37222	0.81994
6.38889	0.82803
6.40556	0.83612
6.42222	0.84421
6.43889	0.85218
6.45556	0.86004
6.47222	0.86778
6.48889	0.87541
6.50556	0.88292
6.52222	0.89032
6.53889	0.89771
6.55556	0.90499
6.57222	0.91204
6.58889	0.91897
6.60556	0.92579
6.62222	0.93248
6.63889	0.93907
6.65556	0.94542
6.67222	0.95153
6.68889	0.95747
6.70556	0.96318
6.72222	0.9686
6.73889	0.97379
6.75556	0.97875
6.77222	0.98348
6.78889	0.98798
6.80556	0.99225
6.82222	0.99617
6.83889	0.99986
6.85556	1.00343
6.87222	1.00678
6.88889	1.0099
6.90556	1.01291
6.92222	1.01569
6.93889	1.01814
6.95556	1.02048
6.97222	1.02272
6.98889	1.02485
7.00556	1.02688
7.02222	1.0288
7.03889	1.03063
7.05556	1.03235
7.07222	1.03408
7.08889	1.0358
7.10556	1.03743
7.12222	1.03895
7.13889	1.04048
7.15556	1.04201
7.17222	1.04353
7.18889	1.04506
7.20556	1.04659
7.22222	1.04811
7.23889	1.04964
7.25556	1.05117
7.27222	1.05269
7.28889	1.05422
7.30556	1.05575
7.32222	1.05717
7.33889	1.05848
7.35556	1.05979
7.37222	1.06111
7.38889	1.06242
7.40556	1.06373
7.42222	1.06504
7.43889	1.06646
7.45556	1.06788
7.47222	1.06919
7.48889	1.07051
7.50556	1.07182
7.52222	1.07313
7.53889	1.07431
7.55556	1.0755
7.57222	1.07681
7.58889	1.07812
7.60556	1.07943
7.62222	1.08075
7.63889	1.08206
7.65556	1.08324
7.67222	1.08429
7.68889	1.08534
7.70556	1.08625
7.72222	1.08701
7.73889	1.08777
7.75556	1.08854
7.77222	1.0893
7.78889	1.09006
7.80556	1.09082
7.82222	1.09158
7.83889	1.09235
7.85556	1.09325
7.87222	1.0943
7.88889	1.09535
7.90556	1.0964
7.92222	1.09745
7.93889	1.09836
7.95556	1.09912
7.97222	1.09988
7.98889	1.10051
8.00556	1.10101
8.02222	1.10151
8.03889	1.102
8.05556	1.10237
8.07222	1.10261
8.08889	1.10286
8.10556	1.1031
8.12222	1.10323
8.13889	1.10323
8.15556	1.10323
8.17222	1.10323
8.18889	1.10323
8.20556	1.10324
8.22222	1.10324
8.23889	1.10324
8.25556	1.10324
8.27222	1.10325
8.37222	1.10325
8.41667	1.10325
8.45278	1.10325
8.48083	1.10325
8.50444	1.10325
8.53361	1.08951
8.55861	1.06891
8.59028	1.03457
8.60889	1.00023
8.62278	0.96588
8.63306	0.93154
8.64389	0.8972
8.65222	0.86286
8.66639	0.82852
8.68111	0.75984
8.69389	0.69116
8.70472	0.62248
8.71417	0.5538
8.72667	0.48512
8.73611	0.41643
8.74639	0.34775
8.75889	0.27907
8.77722	0.21039
8.81417	0.14171
8.84806	0.10737
8.87556	0.09363
8.89306	0.08676
8.90972	0.08676
8.92639	0.09103
8.94306	0.09956
8.95972	0.1082
8.97639	0.11696
8.99306	0.12572
9.00972	0.13448
9.02639	0.14324
9.04306	0.15201
9.05972	0.16077
9.07639	0.16953
9.09306	0.17829
9.10972	0.18705
9.12639	0.19581
9.14306	0.20457
9.15972	0.21333
9.17639	0.22209
9.19306	0.23085
9.20972	0.23962
9.22639	0.24838
9.24306	0.25714
9.25972	0.2659
9.27639	0.27466
9.29306	0.28342
9.30972	0.29218
9.32639	0.30094
9.34306	0.3097
9.35972	0.31846
9.37639	0.32723
9.39306	0.33599
9.40972	0.34475
9.42639	0.35351
9.44306	0.36227
9.45972	0.37103
9.47639	0.37979
9.49306	0.38855
9.50972	0.39731
9.52639	0.40607
9.54306	0.41484
9.55972	0.4236
9.57639	0.43236
9.59306	0.44112
9.60972	0.44988
9.62639	0.45864
9.64306	0.4674
9.65972	0.47616
9.67639	0.48492
9.69306	0.49368
9.70972	0.50245
9.72639	0.51121
9.74306	0.51997
9.75972	0.52873
9.77639	0.53749
9.79306	0.54625
9.80972	0.55501
9.82639	0.56377
9.84306	0.57253
9.85972	0.58129
9.87639	0.59006
9.89306	0.59882
9.90972	0.60758
9.92639	0.61622
9.94306	0.62487
9.95972	0.63351
9.97639	0.64216
9.99306	0.65092
10.0097	0.65968
10.0264	0.66844
10.0431	0.6772
10.0597	0.68596
10.0764	0.69473
10.0931	0.70337
10.1097	0.71202
10.1264	0.72066
10.1431	0.72919
10.1597	0.73772
10.1764	0.74625
10.1931	0.75478
10.2097	0.76331
10.2264	0.77184
10.2431	0.78037
10.2597	0.7889
10.2764	0.79743
10.2931	0.80596
10.3097	0.81449
10.3264	0.82291
10.3431	0.83121
10.3597	0.83951
10.3764	0.84781
10.3931	0.85599
10.4097	0.86406
10.4264	0.87201
10.4431	0.87985
10.4597	0.88769
10.4764	0.89541
10.4931	0.90301
10.5097	0.9105
10.5264	0.91776
10.5431	0.9249
10.5597	0.93193
10.5764	0.93861
10.5931	0.94493
10.6097	0.95115
10.6264	0.95724
10.6431	0.96299
10.6597	0.96839
10.6764	0.97356
10.6931	0.97839
10.7097	0.98298
10.7264	0.98734
10.7431	0.99135
10.7597	0.99513
10.7764	0.99857
10.7931	1.00167
10.8097	1.00453
10.8264	1.00727
10.8431	1.00989
10.8597	1.01231
10.8764	1.01451
10.8931	1.0165
10.9097	1.01828
10.9264	1.01996
10.9431	1.02154
10.9597	1.02302
10.9764	1.02431
10.9931	1.02559
11.0097	1.02707
11.0264	1.02856
11.0431	1.03004
11.0597	1.03152
11.0764	1.03301
11.0931	1.03439
11.1097	1.03558
11.1264	1.03654
11.1431	1.03737
11.1597	1.03819
11.1764	1.03902
11.1931	1.03969
11.2097	1.04022
11.2264	1.04075
11.2431	1.04128
11.2597	1.0418
11.2764	1.04233
11.2931	1.04286
11.3097	1.04325
11.3264	1.0435
11.3431	1.04375
11.3597	1.04401
11.3764	1.0444
11.3931	1.04492
11.4097	1.04545
11.4264	1.04598
11.4431	1.04637
11.4597	1.04676
11.4764	1.04729
11.4931	1.04767
11.5097	1.04806
11.5264	1.04859
11.5431	1.04912
11.5597	1.04965
11.5764	1.05017
11.5931	1.0507
11.6097	1.05109
11.6264	1.05134
11.6431	1.05159
11.6597	1.05184
11.6764	1.05223
11.6931	1.05262
11.7097	1.05287
11.7264	1.05312
11.7431	1.05337
11.7597	1.05362
11.7764	1.05387
11.7931	1.054
11.8097	1.054
11.8264	1.05399
11.8431	1.05399
11.8597	1.05399
11.8764	1.05411
11.8931	1.05437
11.9097	1.05462
11.9264	1.05487
11.9431	1.05512
11.9597	1.05537
11.9764	1.05562
11.9931	1.05587
12.0097	1.05612
12.0264	1.05638
12.0431	1.0565
12.0597	1.0565
12.0764	1.0565
12.0931	1.05649
12.1097	1.05649
12.1264	1.05649
12.1431	1.05661
12.2917	1.05661
12.3181	1.05661
12.3456	1.05661
12.3694	1.05661
12.3894	1.05661
12.415	1.05661
12.4358	1.05661
12.4592	1.05661
12.4725	1.02227
12.4842	0.98793
12.4947	0.95359
12.5044	0.91925
12.5131	0.88491
12.5272	0.85057
12.5394	0.78189
12.5508	0.71321
12.5617	0.64453
12.5711	0.57584
12.5847	0.50716
12.5936	0.43848
12.6036	0.3698
12.6169	0.30112
12.6353	0.23244
12.67	0.16376
12.6925	0.12942
12.7178	0.10881
12.73	0.10194
12.7456	0.09507
12.7622	0.09508
12.7789	0.09935
12.7956	0.10788
12.8122	0.11641
12.8289	0.12505
12.8456	0.13382
12.8622	0.14258
12.8789	0.15134
12.8956	0.1601
12.9122	0.16887
12.9289	0.17763
12.9456	0.18639
12.9622	0.19516
12.9789	0.20392
12.9956	0.21268
13.0122	0.22145
13.0289	0.23021
13.0456	0.23897
13.0622	0.24773
13.0789	0.2565
13.0956	0.26526
13.1122	0.27402
13.1289	0.28279
13.1456	0.29155
13.1622	0.30031
13.1789	0.30908
13.1956	0.31784
13.2122	0.3266
13.2289	0.33536
13.2456	0.34412
13.2622	0.35289
13.2789	0.36165
13.2956	0.37041
13.3122	0.37917
13.3289	0.38793
13.3456	0.39669
13.3622	0.40545
13.3789	0.41422
13.3956	0.42298
13.4122	0.43174
13.4289	0.4405
13.4456	0.44926
13.4622	0.45802
13.4789	0.46678
13.4956	0.47554
13.5122	0.4843
13.5289	0.49306
13.5456	0.50183
13.5622	0.51059
13.5789	0.51935
13.5956	0.52811
13.6122	0.53687
13.6289	0.54563
13.6456	0.55439
13.6622	0.56315
13.6789	0.57191
13.6956	0.58067
13.7122	0.58944
13.7289	0.5982
13.7456	0.60696
13.7622	0.61572
13.7789	0.62448
13.7956	0.63324
13.8122	0.642
13.8289	0.65076
13.8456	0.65952
13.8622	0.66828
13.8789	0.67704
13.8956	0.68581
13.9122	0.69457
13.9289	0.70333
13.9456	0.71197
13.9622	0.7205
13.9789	0.72903
13.9956	0.73756
14.0122	0.74609
14.0289	0.75462
14.0456	0.76315
14.0622	0.77169
14.0789	0.78022
14.0956	0.78875
14.1122	0.79728
14.1289	0.80581
14.1456	0.81434
14.1622	0.82287
14.1789	0.8314
14.1956	0.83993
14.2122	0.84834
14.2289	0.85664
14.2456	0.86494
14.2622	0.87324
14.2789	0.88142
14.2956	0.88949
14.3122	0.89756
14.3289	0.90551
14.3456	0.91335
14.3622	0.92107
14.3789	0.92868
14.3956	0.93617
14.4122	0.94354
14.4289	0.95069
14.4456	0.95748
14.4622	0.96416
14.4789	0.9706
14.4956	0.97682
14.5122	0.98292
14.5289	0.98878
14.5456	0.99442
14.5622	0.99982
14.5789	1.00499
14.5956	1.00993
14.6122	1.01463
14.6289	1.01899
14.6456	1.02313
14.6622	1.02714
14.6789	1.03092
14.6956	1.03448
14.7122	1.0378
14.7289	1.04101
14.7456	1.044
14.7622	1.04664
14.7789	1.04906
14.7956	1.05127
14.8122	1.05326
14.8289	1.05514
14.8456	1.05703
14.8622	1.05891
14.8789	1.06069
14.8956	1.06237
14.9122	1.06385
14.9289	1.06514
14.9456	1.06632
14.9622	1.06739
14.9789	1.06847
14.9956	1.06941
15.0122	1.07022
15.0289	1.07102
15.0456	1.07183
15.0622	1.07264
15.0789	1.07345
15.0956	1.07426
15.1122	1.07507
15.1289	1.07588
15.1456	1.07669
15.1622	1.07735
15.1789	1.07786
15.1956	1.07837
15.2122	1.07888
15.2289	1.07925
15.2456	1.0795
15.2622	1.07974
15.2789	1.07998
15.2956	1.08022
15.3122	1.08046
15.3289	1.0807
15.3456	1.08108
15.3622	1.08159
15.3789	1.0821
15.3956	1.08261
15.4122	1.08312
15.4289	1.0835
15.4456	1.08374
15.4622	1.08398
15.4789	1.08422
15.4956	1.08446
15.5122	1.08471
15.5289	1.08495
15.5456	1.08519
15.5622	1.08543
15.5789	1.08567
15.5956	1.08605
15.6122	1.08642
15.6289	1.08667
15.6456	1.08691
15.6622	1.08715
15.6789	1.08739
15.6956	1.08763
15.7122	1.08801
15.7289	1.08852
15.7456	1.08904
15.7622	1.08941
15.7789	1.08965
15.7956	1.08989
15.8122	1.09001
15.8289	1.09
15.8456	1.08987
15.8622	1.0895
15.8789	1.08901
15.8956	1.08852
15.9122	1.08803
15.9289	1.08754
15.9456	1.08717
15.9622	1.08716
15.9789	1.08716
15.9956	1.08703
16.0122	1.08702
16.0289	1.08688
16.0456	1.08663
16.0622	1.08638
16.0789	1.08625
16.0956	1.08624
16.2125	1.08624
16.2569	1.08624
16.2917	1.08624
16.3181	1.08624
16.3394	1.08624
16.3658	1.08624
16.3886	1.08624
16.4136	1.08624
16.4289	1.05189
16.4414	1.01755
16.4514	0.98321
16.4614	0.94887
16.4697	0.91453
16.4869	0.88019
16.4994	0.81151
16.5108	0.74283
16.5231	0.67415
16.5331	0.60547
16.5492	0.53678
16.5589	0.4681
16.5686	0.39942
16.5794	0.33074
16.5933	0.26206
16.625	0.19338
16.6431	0.15904
16.6539	0.13843
16.6644	0.1247
16.6881	0.10409
16.6997	0.09722
16.7122	0.09036
16.7289	0.09036
16.7456	0.09463
16.7622	0.10316
16.7789	0.11169
16.7956	0.12033
16.8122	0.12909
16.8289	0.13785
16.8456	0.14661
16.8622	0.15538
16.8789	0.16414
16.8956	0.1729
16.9122	0.18166
16.9289	0.19042
16.9456	0.19918
16.9622	0.20794
16.9789	0.2167
16.9956	0.22546
17.0122	0.23422
17.0289	0.24299
17.0456	0.25175
17.0622	0.26051
17.0789	0.26927
17.0956	0.27803
17.1122	0.28679
17.1289	0.29555
17.1456	0.30431
17.1622	0.31307
17.1789	0.32183
17.1956	0.33059
17.2122	0.33936
17.2289	0.34812
17.2456	0.35688
17.2622	0.36564
17.2789	0.3744
17.2956	0.38316
17.3122	0.39192
17.3289	0.40068
17.3456	0.40944
17.3622	0.4182
17.3789	0.42697
17.3956	0.43573
17.4122	0.44449
17.4289	0.45325
17.4456	0.46201
17.4622	0.47077
17.4789	0.47953
17.4956	0.48829
17.5122	0.49705
17.5289	0.50581
17.5456	0.51458
17.5622	0.52334
17.5789	0.5321
17.5956	0.54086
17.6122	0.54962
17.6289	0.55838
17.6456	0.56714
17.6622	0.5759
17.6789	0.58466
17.6956	0.59342
17.7122	0.60219
17.7289	0.61095
17.7456	0.61971
17.7622	0.62847
17.7789	0.63723
17.7956	0.64588
17.8122	0.65441
17.8289	0.66294
17.8456	0.67147
17.8622	0.68
17.8789	0.68853
17.8956	0.69706
17.9122	0.70559
17.9289	0.71412
17.9456	0.72265
17.9622	0.73118
17.9789	0.73971
17.9956	0.74824
18.0122	0.75665
18.0289	0.76495
18.0456	0.77325
18.0622	0.78155
18.0789	0.78985
18.0956	0.79803
18.1122	0.8061
18.1289	0.81417
18.1456	0.82223
18.1622	0.83019
18.1789	0.83802
18.1956	0.84574
18.2122	0.85335
18.2289	0.86084
18.2456	0.86821
18.2622	0.87559
18.2789	0.88285
18.2956	0.88976
18.3122	0.89643
18.3289	0.903
18.3456	0.90932
18.3622	0.91542
18.3789	0.92129
18.3956	0.92692
18.4122	0.93232
18.4289	0.93761
18.4456	0.94254
18.4622	0.94713
18.4789	0.95172
18.4956	0.9562
18.5122	0.96044
18.5289	0.96446
18.5456	0.96836
18.5622	0.97202
18.5789	0.97546
18.5956	0.97878
18.6122	0.98188
18.6289	0.98474
18.6456	0.98738
18.6622	0.9898
18.6789	0.99211
18.6956	0.99421
18.7122	0.99609
18.7289	0.99797
18.7456	0.99976
18.7622	1.00144
18.7789	1.00312
18.7956	1.0047
18.8122	1.00619
18.8289	1.00768
18.8456	1.00917
18.8622	1.01056
18.8789	1.01186
18.8956	1.01315
18.9122	1.01445
18.9289	1.01565
18.9456	1.01674
18.9622	1.01771
18.9789	1.01855
18.9956	1.01939
19.0122	1.02023
19.0289	1.02106
19.0456	1.0219
19.0622	1.02274
19.0789	1.02343
19.0956	1.02396
19.1122	1.02449
19.1289	1.02503
19.1456	1.02556
19.1622	1.02596
19.1789	1.02621
19.1956	1.02661
19.2122	1.02714
19.2289	1.02768
19.2456	1.02807
19.2622	1.02833
19.2789	1.02858
19.2956	1.02884
19.3122	1.02909
19.3289	1.02935
19.3456	1.0296
19.3622	1.03
19.3789	1.03053
19.3956	1.03093
19.4122	1.03132
19.4289	1.03186
19.4456	1.03239
19.4622	1.03293
19.4789	1.03346
19.4956	1.034
19.5122	1.03439
19.5289	1.03465
19.5456	1.0349
19.5622	1.03516
19.5789	1.03542
19.5956	1.03567
19.6122	1.03607
19.6289	1.03646
19.6456	1.03672
19.6622	1.03697
19.6789	1.03723
19.6956	1.03736
19.7122	1.03736
19.7289	1.03736
19.7456	1.03736
19.7622	1.03748
19.7789	1.03774
19.7956	1.038
19.8122	1.03825
19.8289	1.03851
19.8456	1.03876
19.8622	1.03902
19.8789	1.03941
19.9942	1.03941
20.0378	1.03941
20.0719	1.03941
20.0994	1.03941
20.1211	1.03941
20.1494	1.03941
20.1711	1.03941
20.195	1.03941
20.2092	1.00507
20.2203	0.97072
20.23	0.93638
20.2392	0.90204
20.2472	0.8677
20.2667	0.83336
20.2778	0.76468
20.2886	0.696
20.3	0.62732
20.31	0.55864
20.3269	0.48996
20.3361	0.42127
20.3483	0.35259
20.3655	0.28391
20.39	0.21523
20.4789	0.14655
20.5033	0.13281
20.5339	0.11908
20.5653	0.11221
20.5819	0.11221
20.5986	0.11208
20.6153	0.11623
20.6319	0.12476
20.6486	0.1334
20.6653	0.14216
20.6819	0.15092
20.6986	0.15968
20.7153	0.16844
20.7319	0.17719
20.7486	0.18595
20.7653	0.19471
20.7819	0.20347
20.7986	0.21223
20.8153	0.22099
20.8319	0.22975
20.8486	0.23851
20.8653	0.24727
20.8819	0.25602
20.8986	0.26478
20.9153	0.27354
20.9319	0.2823
20.9486	0.29106
20.9653	0.29982
20.9819	0.30858
20.9986	0.31734
21.0153	0.3261
21.0319	0.33485
21.0486	0.34361
21.0653	0.35237
21.0819	0.36113
21.0986	0.36989
21.1153	0.37865
21.1319	0.38741
21.1486	0.39617
21.1653	0.40493
21.1819	0.41369
21.1986	0.42244
21.2153	0.4312
21.2319	0.43996
21.2486	0.44872
21.2653	0.45748
21.2819	0.46624
21.2986	0.475
21.3153	0.48376
21.3319	0.49252
21.3486	0.50127
21.3653	0.51003
21.3819	0.51879
21.3986	0.52755
21.4153	0.53631
21.4319	0.54507
21.4486	0.55383
21.4653	0.56259
21.4819	0.57135
21.4986	0.5801
21.5153	0.58886
21.5319	0.59762
21.5486	0.60638
21.5653	0.61514
21.5819	0.6239
21.5986	0.63266
21.6153	0.64142
21.6319	0.65018
21.6486	0.65894
21.6653	0.66758
21.6819	0.67611
21.6986	0.68463
21.7153	0.69316
21.7319	0.70169
21.7486	0.71022
21.7653	0.71874
21.7819	0.72727
21.7986	0.73568
21.8153	0.74398
21.8319	0.75228
21.8486	0.76057
21.8653	0.76875
21.8819	0.77682
21.8986	0.78488
21.9153	0.79295
21.9319	0.8009
21.9486	0.80873
21.9653	0.81656
21.9819	0.82428
21.9986	0.83189
22.0153	0.83937
22.0319	0.84675
22.0486	0.854
22.0653	0.86102
22.0819	0.86793
22.0986	0.87484
22.1153	0.88163
22.1319	0.88819
22.1486	0.89451
22.1653	0.90072
22.1819	0.90682
22.1986	0.91268
22.2153	0.91831
22.2319	0.92383
22.2486	0.92922
22.2653	0.93439
22.2819	0.93921
22.2986	0.9438
22.3153	0.94827
22.3319	0.95251
22.3486	0.95652
22.3653	0.96038
22.3819	0.96413
22.3986	0.96779
22.4153	0.97123
22.4319	0.97444
22.4486	0.97764
22.4653	0.98073
22.4819	0.98371
22.4986	0.98657
22.5153	0.98921
22.5319	0.99163
22.5486	0.99393
22.5653	0.99623
22.5819	0.99843
22.5986	1.00041
22.6153	1.00229
22.6319	1.00406
22.6486	1.00574
22.6653	1.00732
22.6819	1.0087
22.6986	1.00998
22.7153	1.01127
22.7319	1.01256
22.7486	1.01384
22.7653	1.01502
22.7819	1.0161
22.7986	1.01706
22.8153	1.01788
22.8319	1.0187
22.8486	1.01953
22.8653	1.02035
22.8819	1.02118
22.8986	1.02185
22.9153	1.02238
22.9319	1.02276
22.9486	1.02301
22.9653	1.0234
22.9819	1.02393
22.9986	1.02445
23.0153	1.02498
23.0319	1.0255
23.0486	1.02589
23.0653	1.02614
23.0819	1.02639
23.0986	1.02664
23.1153	1.02689
23.1319	1.02714
23.1486	1.02739
23.1653	1.02763
23.1819	1.02788
23.1986	1.02813
23.2153	1.02838
23.2319	1.02863
23.2486	1.02902
23.2653	1.02954
23.2819	1.03007
23.2986	1.0306
23.3153	1.03112
23.3319	1.03165
23.3486	1.03232
23.3653	1.03315
23.3819	1.03397
23.3986	1.03479
23.4153	1.03562
23.4319	1.03629
23.4486	1.03682
23.4653	1.03734
23.4819	1.03787
23.4986	1.03839
23.5153	1.03892
23.5319	1.03944
23.5486	1.03997
23.5653	1.0405
23.5819	1.04102
23.5986	1.04155
23.6153	1.04207
23.6319	1.0426
23.6486	1.04327
23.6653	1.0441
23.6819	1.04493
23.6986	1.04575
23.7153	1.04658
23.7319	1.0474
23.7486	1.04823
23.7653	1.04906
23.7819	1.04973
23.7986	1.05012
23.8153	1.05037
23.8319	1.05062
23.8486	1.05101
23.8653	1.05153
23.8819	1.05192
23.8986	1.05217
23.9153	1.05242
23.9319	1.05267
23.9486	1.05305
23.9653	1.05358
23.9819	1.0541
23.9986	1.05463
24.0153	1.05489
24.0319	1.05488
24.0486	1.05501
24.0653	1.05525
24.0819	1.0555
24.0986	1.05575
24.1153	1.056
24.1319	1.05625
24.1486	1.05649
24.1653	1.05674
24.1819	1.05699
24.1986	1.05724
24.2153	1.05762
24.2319	1.05801
24.2486	1.05839
24.2653	1.05878
24.2819	1.05903
24.2986	1.05928
24.3783	1.05928
24.4319	1.05928
24.4692	1.05928
24.4978	1.05928
24.5214	1.05928
24.5511	1.05928
24.5767	1.05928
24.6089	1.05928
24.6297	1.02494
24.6422	0.9906
24.6528	0.95626
24.6622	0.92192
24.6705	0.88757
24.688	0.85323
24.6989	0.78455
24.7119	0.71587
24.7242	0.64719
24.7358	0.57851
24.7505	0.50983
24.7647	0.44115
24.78	0.37246
24.7989	0.30378
24.8239	0.2351
24.8583	0.16642
24.8844	0.13208
24.8992	0.11834
24.9189	0.10461
24.9294	0.09774
24.9436	0.09087
24.9436	0.09087
24.9603	0.09526
24.9769	0.10416
24.9936	0.11317
25.0103	0.12219
25.0269	0.1312
25.0436	0.14022
25.0603	0.14923
25.0769	0.15825
25.0936	0.16726
25.1103	0.17627
25.1269	0.18529
25.1436	0.1943
25.1603	0.20332
25.1769	0.21233
25.1936	0.22135
25.2103	0.23036
25.2269	0.23938
25.2436	0.24839
25.2603	0.2574
25.2769	0.26642
25.2936	0.27543
25.3103	0.28445
25.3269	0.29346
25.3436	0.30248
25.3603	0.31149
25.3769	0.3205
25.3936	0.32952
25.4103	0.33853
25.4269	0.34755
25.4436	0.35656
25.4603	0.36558
25.4769	0.37459
25.4936	0.38361
25.5103	0.39262
25.5269	0.40163
25.5436	0.41065
25.5603	0.41966
25.5769	0.42868
25.5936	0.43769
25.6103	0.44671
25.6269	0.45572
25.6436	0.46474
25.6603	0.47375
25.6769	0.48276
25.6936	0.49178
25.7103	0.50079
25.7269	0.50981
25.7436	0.51882
25.7603	0.52784
25.7769	0.53685
25.7936	0.54587
25.8103	0.55488
25.8269	0.56389
25.8436	0.57291
25.8603	0.58192
25.8769	0.59094
25.8936	0.59995
25.9103	0.60897
25.9269	0.61798
25.9436	0.627
25.9603	0.63601
25.9769	0.64502
25.9936	0.65404
26.0103	0.66305
26.0269	0.67207
26.0436	0.68108
26.0603	0.69009
26.0769	0.69911
26.0936	0.70812
26.1103	0.71702
26.1269	0.7258
26.1436	0.7347
26.1603	0.7436
26.1769	0.75238
26.1936	0.76116
26.2103	0.76994
26.2269	0.77873
26.2436	0.78751
26.2603	0.79629
26.2769	0.80507
26.2936	0.81385
26.3103	0.82252
26.3269	0.83107
26.3436	0.83962
26.3603	0.84817
26.3769	0.85672
26.3936	0.86527
26.4103	0.87371
26.4269	0.88203
26.4436	0.89035
26.4603	0.89867
26.4769	0.9069
26.4936	0.91501
26.5103	0.9231
26.5269	0.93119
26.5436	0.93916
26.5603	0.9469
26.5769	0.95453
26.5936	0.96215
26.6103	0.96966
26.6269	0.97706
26.6436	0.98434
26.6603	0.99139
26.6769	0.9982
26.6936	1.0049
26.7103	1.01148
26.7269	1.01783
26.7436	1.02395
26.7603	1.02995
26.7769	1.03584
26.7936	1.04138
26.8103	1.04668
26.8269	1.05176
26.8436	1.05649
26.8603	1.06099
26.8769	1.06526
26.8936	1.0693
26.9103	1.07322
26.9269	1.07714
26.9436	1.08084
26.9603	1.08419
26.9769	1.08731
26.9936	1.09021
27.0103	1.09289
27.0269	1.09546
27.0436	1.09792
27.0603	1.10017
27.0769	1.10232
27.0936	1.10426
27.1103	1.10601
27.1269	1.10767
27.1436	1.10922
27.1603	1.11078
27.1769	1.11223
27.1936	1.11358
27.2103	1.11492
27.2269	1.11614
27.2436	1.11706
27.2603	1.11783
27.2769	1.1186
27.2936	1.11938
27.3103	1.12015
27.3269	1.12091
27.3436	1.12169
27.3603	1.12246
27.3769	1.12309
27.3936	1.12359
27.4103	1.12408
27.4269	1.12458
27.4436	1.12508
27.4603	1.12545
27.4769	1.12569
27.4936	1.12593
27.5103	1.12618
27.5269	1.12642
27.5436	1.12655
27.5603	1.12655
27.5769	1.12655
27.5936	1.12655
27.6103	1.12655
27.6269	1.12655
27.6436	1.12655
27.6603	1.12655
27.6769	1.12643
27.6936	1.12632
27.7103	1.12632
27.7269	1.12632
27.7436	1.12632
27.7603	1.12632
27.7769	1.12632
27.7936	1.12632
27.8103	1.12632
27.8269	1.12621
27.8436	1.12609
27.8603	1.12597
27.8769	1.12574
27.8936	1.1255
27.9103	1.12538
27.9269	1.12538
27.9436	1.12538
27.9603	1.12526
27.9769	1.12515
27.9936	1.12515
28.0103	1.12515
28.0269	1.12503
28.0436	1.12479
28.0603	1.12468
28.1772	1.12468
28.2217	1.12468
28.2564	1.12468
28.2828	1.12468
28.3042	1.12468
28.3305	1.12468
28.3533	1.12468
28.3764	1.12468
28.3969	1.09034
28.4053	1.056
28.4136	1.02166
28.4248	0.98732
28.4356	0.95298
28.4511	0.91864
28.4623	0.84996
28.4696	0.78127
28.4824	0.71259
28.4954	0.64391
28.5086	0.57523
28.5186	0.50655
28.5289	0.43787
28.5491	0.36919
28.5753	0.30051
28.6353	0.23182
28.6847	0.19748
28.7153	0.16314
28.7467	0.1288
28.7466	0.1288
28.7633	0.13247
28.78	0.13913
28.7966	0.14636
28.8133	0.15486
28.83	0.16336
28.8467	0.17187
28.8633	0.18037
28.88	0.18887
28.8967	0.19738
28.9133	0.20588
28.93	0.21438
28.9467	0.22289
28.9633	0.23139
28.98	0.23989
28.9966	0.24828
29.0133	0.25656
29.03	0.26483
29.0466	0.2731
29.0633	0.28137
29.08	0.28965
29.0967	0.29792
29.1133	0.30619
29.13	0.31446
29.1467	0.32274
29.1633	0.33101
29.18	0.33928
29.1967	0.34755
29.2133	0.35583
29.23	0.3641
29.2466	0.37226
29.2633	0.3803
29.28	0.38834
29.2966	0.39638
29.3133	0.40443
29.33	0.41247
29.3467	0.42051
29.3633	0.42855
29.38	0.43648
29.3967	0.44429
29.4133	0.4521
29.43	0.45991
29.4467	0.46772
29.4633	0.47542
29.48	0.483
29.4966	0.49058
29.5133	0.49816
29.53	0.50574
29.5466	0.51332
29.5633	0.5209
29.58	0.52836
29.5967	0.53571
29.6133	0.54306
29.63	0.55041
29.6467	0.55775
29.6633	0.5651
29.68	0.57245
29.6967	0.5798
29.7133	0.58703
29.73	0.59415
29.7466	0.60126
29.7633	0.60838
29.78	0.6155
29.7966	0.62261
29.8133	0.62961
29.83	0.6365
29.8467	0.64339
29.8633	0.65027
29.88	0.65716
29.8967	0.66404
29.9133	0.67081
29.93	0.67747
29.9467	0.68412
29.9633	0.69077
29.98	0.69743
29.9966	0.70408
30.0133	0.71073
30.03	0.71727
30.0466	0.72369
30.0633	0.73011
30.08	0.73653
30.0967	0.74295
30.1133	0.74937
30.13	0.75579
30.1467	0.76221
30.1633	0.76851
30.18	0.7747
30.1967	0.78089
30.2133	0.78708
30.23	0.79326
30.2466	0.79934
30.2633	0.80529
30.28	0.81125
30.2966	0.81721
30.3133	0.82305
30.33	0.82877
30.3467	0.8345
30.3633	0.84022
30.38	0.84594
30.3967	0.85167
30.4133	0.85739
30.43	0.86311
30.4467	0.86884
30.4633	0.87445
30.48	0.87994
30.4966	0.88543
30.5133	0.89092
30.53	0.89641
30.5466	0.9019
30.5633	0.90739
30.58	0.91277
30.5967	0.91803
30.6133	0.92329
30.63	0.92855
30.6467	0.93369
30.6633	0.93872
30.68	0.94375
30.6967	0.94866
30.7133	0.95346
30.73	0.95814
30.7466	0.9627
30.7633	0.96726
30.78	0.97183
30.7966	0.97628
30.8133	0.98061
30.83	0.98483
30.8467	0.98894
30.8633	0.99304
30.88	0.99715
30.8967	1.00114
30.9133	1.00501
30.93	1.00888
30.9467	1.01264
30.9633	1.01628
30.98	1.01992
30.9966	1.02345
31.0133	1.02686
31.03	1.03027
31.0466	1.03356
31.0633	1.03663
31.08	1.03947
31.0967	1.04231
31.1133	1.04526
31.13	1.04809
31.1467	1.05082
31.1633	1.05343
31.18	1.05593
31.1967	1.05842
31.2133	1.06081
31.23	1.06308
31.2466	1.06536
31.2633	1.06752
31.28	1.06958
31.2966	1.07163
31.3133	1.07369
31.33	1.07563
31.3467	1.07737
31.3633	1.079
31.38	1.08063
31.3967	1.08226
31.4133	1.0838
31.43	1.08523
31.4467	1.08666
31.4633	1.08799
31.48	1.08923
31.4966	1.09038
31.5133	1.09143
31.53	1.09248
31.5466	1.09353
31.5633	1.09448
31.58	1.09533
31.5967	1.09618
31.6133	1.09703
31.63	1.09788
31.6467	1.0986
31.6633	1.09919
31.68	1.09978
31.6967	1.10022
31.7133	1.10051
31.73	1.10079
31.7466	1.10108
31.7633	1.10136
31.78	1.10164
31.7966	1.10179
31.8133	1.10179
31.9286	1.10179
31.9722	1.10179
32.0064	1.10179
32.0339	1.10179
32.0555	1.10179
32.0839	1.10179
32.1055	1.10179
32.1314	1.10179
32.13	1.06745
32.1483	1.03311
32.165	0.99877
32.175	0.96443
32.185	0.93009
32.1983	0.89575
32.2133	0.82707
32.225	0.75839
32.235	0.6897
32.2467	0.62102
32.26	0.55234
32.2733	0.48366
32.2816	0.41498
32.2983	0.3463
32.312	0.27762
32.3483	0.20893
32.38	0.17459
32.435	0.14025
32.48	0.11965
32.435	0.11965
32.4517	0.12131
32.4683	0.1272
32.485	0.13526
32.5016	0.14345
32.5183	0.15162
32.535	0.1598
32.5517	0.16798
32.5683	0.17616
32.585	0.18433
32.6016	0.19251
32.6183	0.20069
32.635	0.20887
32.6516	0.21705
32.6683	0.22523
32.685	0.23341
32.7017	0.24158
32.7183	0.24976
32.735	0.25794
32.7516	0.26612
32.7683	0.27429
32.785	0.28248
32.8017	0.29065
32.8183	0.29883
32.835	0.30701
32.8516	0.31519
32.8683	0.32337
32.885	0.33154
32.9016	0.33973
32.9183	0.3479
32.935	0.35608
32.9517	0.36425
32.9683	0.37244
32.985	0.38061
33.0016	0.38879
33.0183	0.39697
33.035	0.40515
33.0517	0.41332
33.0683	0.4215
33.085	0.42968
33.1016	0.43786
33.1183	0.44603
33.135	0.45422
33.1516	0.46239
33.1683	0.47057
33.185	0.47875
33.2017	0.48693
33.2183	0.4951
33.235	0.50328
33.2516	0.51146
33.2683	0.51963
33.285	0.52781
33.3017	0.53599
33.3183	0.54417
33.335	0.55234
33.3516	0.56052
33.3683	0.5687
33.385	0.57688
33.4016	0.58505
33.4183	0.59324
33.435	0.60141
33.4517	0.60958
33.4683	0.61776
33.485	0.62594
33.5016	0.63412
33.5183	0.64229
33.535	0.65047
33.5517	0.65865
33.5683	0.66682
33.585	0.675
33.6016	0.68318
33.6183	0.69136
33.635	0.69953
33.6516	0.70771
33.6683	0.71577
33.685	0.72374
33.7017	0.73169
33.7183	0.73964
33.735	0.74759
33.7516	0.75555
33.7683	0.7635
33.785	0.77146
33.8017	0.77941
33.8183	0.78737
33.835	0.79532
33.8516	0.80317
33.8683	0.8109
33.885	0.81863
33.9016	0.82636
33.9183	0.83409
33.935	0.84183
33.9517	0.84956
33.9683	0.85729
33.985	0.86502
34.0016	0.87265
34.0183	0.88016
34.035	0.88767
34.0517	0.89518
34.0683	0.90269
34.085	0.91009
34.1016	0.91738
34.1183	0.92467
34.135	0.93196
34.1516	0.93913
34.1683	0.9462
34.185	0.95326
34.2017	0.96022
34.2183	0.96706
34.235	0.9739
34.2516	0.98064
34.2683	0.98725
34.285	0.99376
34.3017	1.00016
34.3183	1.00645
34.335	1.01262
34.3516	1.01879
34.3683	1.02486
34.385	1.0308
34.4016	1.03665
34.4183	1.04226
34.435	1.04776
34.4517	1.05316
34.4683	1.05832
34.485	1.06327
34.5016	1.0681
34.5183	1.07294
34.535	1.07766
34.5517	1.08216
34.5683	1.08644
34.585	1.0905
34.6016	1.09433
34.6183	1.09795
34.635	1.10134
34.6516	1.1045
34.6683	1.10756
34.685	1.11051
34.7017	1.11313
34.7183	1.11553
34.735	1.11783
34.7516	1.12001
34.7683	1.1221
34.785	1.12407
34.8017	1.12575
34.8183	1.12712
[truncated: 66 more rows]

## Sheet: Fig. 3c
Time (h)	Cyclic CO2 loading (mmol g-1)
0	0
0.01667	0.00326
0.03333	0.01083
0.05	0.01935
0.06667	0.02775
0.08333	0.03614
0.1	0.04454
0.11667	0.05294
0.13333	0.06134
0.15	0.06973
0.16667	0.07825
0.18333	0.08688
0.2	0.09551
0.21667	0.10415
0.23333	0.11278
0.25	0.12141
0.26667	0.13004
0.28333	0.13867
0.3	0.14731
0.31667	0.15594
0.33333	0.16457
0.35	0.1732
0.36667	0.18183
0.38333	0.19047
0.4	0.1991
0.41667	0.20773
0.43333	0.21636
0.45	0.22499
0.46667	0.23363
0.48333	0.24226
0.5	0.25089
0.51667	0.25952
0.53333	0.26816
0.55	0.27679
0.56667	0.28542
0.58333	0.29405
0.6	0.30268
0.61667	0.31132
0.63333	0.31995
0.65	0.32858
0.66667	0.33721
0.68333	0.34584
0.7	0.35448
0.71667	0.36311
0.73333	0.37174
0.75	0.38037
0.76667	0.389
0.78333	0.39764
0.8	0.40627
0.81667	0.4149
0.83333	0.42353
0.85	0.43217
0.86667	0.4408
0.88333	0.44943
0.9	0.45806
0.91667	0.46669
0.93333	0.47533
0.95	0.48396
0.96667	0.49259
0.98333	0.50122
1	0.50985
1.01667	0.51849
1.03333	0.52712
1.05	0.53575
1.06667	0.54438
1.08333	0.55302
1.1	0.56165
1.11667	0.57028
1.13333	0.57891
1.15	0.58754
1.16667	0.59618
1.18333	0.60481
1.2	0.61344
1.21667	0.62207
1.23333	0.6307
1.25	0.63934
1.26667	0.64797
1.28333	0.6566
1.3	0.66523
1.31667	0.67386
1.33333	0.68237
1.35	0.69077
1.36667	0.69917
1.38333	0.70756
1.4	0.71596
1.41667	0.72435
1.43333	0.73263
1.45	0.74079
1.46667	0.74884
1.48333	0.75676
1.5	0.76457
1.51667	0.77215
1.53333	0.7796
1.55	0.78694
1.56667	0.79405
1.58333	0.80103
1.6	0.8079
1.61667	0.81453
1.63333	0.82093
1.65	0.82709
1.66667	0.83302
1.68333	0.83882
1.7	0.84439
1.71667	0.84973
1.73333	0.85495
1.75	0.86005
1.76667	0.86503
1.78333	0.86978
1.8	0.87429
1.81667	0.87868
1.83333	0.88296
1.85	0.887
1.86667	0.89093
1.88333	0.89462
1.9	0.89808
1.91667	0.90142
1.93333	0.90453
1.95	0.90752
1.96667	0.91051
1.98333	0.91338
2	0.91614
2.01667	0.91878
2.03333	0.92131
2.05	0.92384
2.06667	0.92637
2.08333	0.92879
2.1	0.93109
2.11667	0.93328
2.13333	0.93536
2.15	0.93755
2.16667	0.93974
2.18333	0.94182
2.2	0.9439
2.21667	0.94598
2.23333	0.94805
2.25	0.95013
2.26667	0.9521
2.28333	0.95396
2.3	0.95582
2.31667	0.95768
2.33333	0.95954
2.35	0.9614
2.36667	0.96316
2.38333	0.96471
2.4	0.96615
2.41667	0.9676
2.43333	0.96905
2.45	0.9705
2.46667	0.97195
2.48333	0.97339
2.5	0.97484
2.51667	0.97629
2.53333	0.97774
2.55	0.97918
2.56667	0.98053
2.58333	0.98179
2.6	0.98304
2.61667	0.98439
2.63333	0.98584
2.65	0.98728
2.66667	0.98873
2.68333	0.99017
2.7	0.99162
2.71667	0.99307
2.73333	0.99451
2.75	0.99596
2.76667	0.9974
2.78333	0.99875
2.8	1
2.81667	1.00126
2.83333	1.00251
2.85	1.00376
2.86667	1.00501
2.88333	1.00626
2.9	1.00751
2.91667	1.00876
2.93333	1.00992
2.95	1.01107
2.96667	1.01232
2.98333	1.01357
3	1.01473
3.01667	1.01579
3.03333	1.01684
3.05	1.0179
3.06667	1.01896
3.08333	1.02002
3.1	1.02108
3.11667	1.02214
3.13333	1.02309
3.15	1.02394
3.16667	1.0249
3.18333	1.02595
3.2	1.02701
3.21667	1.02807
3.23333	1.02912
3.25	1.03018
3.26667	1.03113
3.28333	1.03198
3.3	1.03283
3.31667	1.03368
3.33333	1.03453
3.35	1.03538
3.36667	1.03623
3.38333	1.03708
3.4	1.03793
3.41667	1.03864
3.43333	1.03922
3.45	1.03994
3.46667	1.04065
3.48333	1.04123
3.5	1.04194
3.51667	1.04266
3.53333	1.04324
3.55	1.04382
3.56667	1.04439
3.58333	1.04497
3.6	1.04569
3.61667	1.0464
3.63333	1.04698
3.65	1.04755
3.66667	1.04813
3.68333	1.04854
3.7	1.04865
3.71667	1.0486
3.73333	1.04871
3.75	1.04912
3.76667	1.04983
3.78333	1.05054
3.8	1.05125
3.81667	1.05195
3.83333	1.05253
3.85	1.0531
3.86667	1.05367
3.88333	1.05425
3.9	1.05482
3.91667	1.05563
3.93333	1.05668
3.95	1.05773
3.96667	1.05878
3.98333	1.05983
4	1.06089
4.01667	1.06205
4.03333	1.0633
4.05	1.06465
4.06667	1.066
4.08333	1.06715
4.1	1.0681
4.11667	1.06894
4.13333	1.06977
4.15	1.07072
4.415	1.0484
4.42694	1.04096
4.43333	1.03352
4.45778	0.99632
4.47417	0.95911
4.48806	0.92191
4.50139	0.88471
4.515	0.84751
4.52889	0.8103
4.54222	0.7731
4.55528	0.7359
4.56889	0.6987
4.60361	0.62429
4.64139	0.54989
4.67917	0.47548
4.7225	0.40108
4.76861	0.32667
4.83167	0.25227
4.90806	0.17786
4.95194	0.14066
5.00861	0.10346
5.02528	0.10639
5.04195	0.11295
5.05861	0.1201
5.07528	0.12702
5.09195	0.13393
5.10861	0.14097
5.12528	0.14812
5.14195	0.15539
5.15861	0.16277
5.17528	0.17028
5.19195	0.1779
5.20861	0.18576
5.22528	0.19373
5.24195	0.20183
5.25861	0.21004
5.27528	0.21825
5.29195	0.22658
5.30861	0.23491
5.32528	0.24323
5.34195	0.25168
5.35861	0.26013
5.37528	0.26857
5.39195	0.27702
5.40861	0.28546
5.42528	0.29391
5.44195	0.30235
5.45861	0.3108
5.47528	0.31925
5.49195	0.32769
5.50861	0.33614
5.52528	0.34458
5.54195	0.35303
5.55861	0.36148
5.57528	0.36992
5.59195	0.37825
5.60861	0.38646
5.62528	0.39467
5.64195	0.40288
5.65861	0.41109
5.67528	0.41931
5.69195	0.42752
5.70861	0.43573
5.72528	0.44394
5.74195	0.45215
5.75861	0.46036
5.77528	0.46845
5.79195	0.47642
5.80861	0.4844
5.82528	0.49237
5.84195	0.50035
5.85861	0.50833
5.87528	0.51618
5.89195	0.52392
5.90861	0.53166
5.92528	0.5394
5.94195	0.54715
5.95861	0.55489
5.97528	0.56263
5.99195	0.57025
6.00861	0.57775
6.02528	0.58526
6.04195	0.59276
6.05861	0.60027
6.07528	0.60777
6.09195	0.61527
6.10861	0.62278
6.12528	0.63017
6.14195	0.63744
6.15861	0.64471
6.17528	0.65197
6.19195	0.65913
6.20861	0.66616
6.22528	0.67319
6.24195	0.68011
6.25861	0.68679
6.27528	0.69335
6.29195	0.69979
6.30861	0.70612
6.32528	0.71232
6.34195	0.71841
6.35861	0.72427
6.37528	0.72977
6.39195	0.73515
6.40861	0.74042
6.42528	0.74545
6.44195	0.75013
6.45861	0.75457
6.47528	0.7589
6.49195	0.763
6.50861	0.76685
6.52528	0.77048
6.54195	0.77399
6.55861	0.77738
6.57528	0.78066
6.59195	0.78382
6.60861	0.78687
6.62528	0.7898
6.64195	0.79262
6.65861	0.79544
6.67528	0.79815
6.69195	0.80074
6.70861	0.80322
6.72528	0.8056
6.74195	0.80786
6.75861	0.81002
6.77528	0.81218
6.79195	0.81423
6.80861	0.81618
6.82528	0.81813
6.84195	0.82008
6.85861	0.82202
6.87528	0.82387
6.89195	0.82572
6.90861	0.82767
6.92528	0.82952
6.94195	0.83126
6.95861	0.83301
6.97528	0.83466
6.99195	0.83621
7.00861	0.83776
7.02528	0.83931
7.04195	0.84085
7.05861	0.8424
7.07528	0.84395
7.09195	0.8455
7.10861	0.84694
7.12528	0.84828
7.14195	0.84948
7.15861	0.85069
7.17528	0.85202
7.19195	0.85336
7.20861	0.8548
7.22528	0.85624
7.24195	0.85758
7.25861	0.85891
7.27528	0.86025
7.29195	0.86169
7.30861	0.86334
7.32528	0.86509
7.34195	0.86674
7.35861	0.86829
7.37528	0.86984
7.39195	0.87139
7.40861	0.87295
7.42528	0.87439
7.44195	0.87573
7.45861	0.87707
7.47528	0.87841
7.49195	0.87985
7.50861	0.8814
7.52528	0.88295
7.54195	0.88451
7.55861	0.88606
7.57528	0.88761
7.59195	0.88906
7.60861	0.8904
7.62528	0.89174
7.64195	0.89308
7.65861	0.89441
7.67528	0.89562
7.69195	0.8967
7.70861	0.89778
7.72528	0.89899
7.74195	0.90033
7.75861	0.90167
7.77528	0.90301
7.79195	0.90435
7.80861	0.90556
7.82528	0.90664
7.84195	0.90772
7.85861	0.90879
7.87528	0.90987
7.89195	0.91095
7.90861	0.91203
7.92528	0.91311
7.94195	0.91431
7.95861	0.91566
7.97528	0.917
7.99195	0.91821
8.00861	0.91928
8.02528	0.92036
8.04195	0.92129
8.05861	0.92222
8.07528	0.9233
8.09195	0.92437
8.10861	0.92545
8.12528	0.92638
8.14195	0.92716
8.15861	0.92794
8.17528	0.92886
8.19195	0.92994
8.20861	0.93102
8.22528	0.93223
8.24195	0.93357
8.25861	0.93491
8.27528	0.93612
8.29195	0.93705
8.30861	0.93769
8.32528	0.93819
8.34195	0.9387
8.35861	0.9392
8.37528	0.9397
8.39195	0.94007
8.40861	0.94045
8.42528	0.94082
8.44195	0.94107
8.45861	0.94132
8.47528	0.94169
8.49195	0.94219
8.50861	0.94283
8.52528	0.94361
8.54195	0.94439
8.55861	0.94517
8.57528	0.94595
8.59195	0.94673
8.60861	0.94737
8.62528	0.94787
8.64195	0.94837
8.65861	0.94887
8.67528	0.94938
8.69195	0.95002
8.70861	0.95079
8.72528	0.95157
8.74195	0.95235
8.75861	0.95313
8.77528	0.95391
8.79195	0.95469
9.03083	0.94725
9.04195	0.93237
9.05833	0.92493
9.06917	0.91749
9.0975	0.88028
9.11667	0.84308
9.13389	0.80588
9.14972	0.76868
9.16361	0.73147
9.17945	0.69427
9.19556	0.65707
9.2125	0.61987
9.22833	0.58266
9.27195	0.50826
9.31333	0.43385
9.41695	0.35945
9.48639	0.28505
9.57389	0.15856
9.62806	0.13624
9.64472	0.1385
9.66139	0.14345
9.67806	0.14678
9.69472	0.14987
9.71139	0.15482
9.72806	0.16047
9.74472	0.16671
9.76139	0.17342
9.77806	0.18037
9.79472	0.18756
9.81139	0.19486
9.82806	0.20228
9.84472	0.20981
9.86139	0.21735
9.87806	0.22501
9.89472	0.23278
9.91139	0.24067
9.92806	0.24868
9.94472	0.25668
9.96139	0.26469
9.97806	0.27269
9.99472	0.2807
10.0114	0.28871
10.0281	0.29671
10.0447	0.30472
10.0614	0.31273
10.0781	0.32073
10.0947	0.32874
10.1114	0.33675
10.1281	0.34475
10.1447	0.35276
10.1614	0.36076
10.1781	0.36877
10.1947	0.37678
10.2114	0.38478
10.2281	0.39279
10.2447	0.4008
10.2614	0.4088
10.2781	0.41669
10.2947	0.42458
10.3114	0.43247
10.3281	0.44024
10.3447	0.44801
10.3614	0.45579
10.3781	0.46356
10.3947	0.47133
10.4114	0.4791
10.4281	0.48687
10.4447	0.49461
10.4614	0.50235
10.4781	0.51012
10.4947	0.51789
10.5114	0.52566
10.5281	0.53331
10.5447	0.54085
10.5614	0.54838
10.5781	0.55592
10.5947	0.56345
10.6114	0.57087
10.6281	0.57817
10.6447	0.58548
10.6614	0.59278
10.6781	0.60008
10.6947	0.60738
10.7114	0.61456
10.7281	0.62163
10.7447	0.6287
10.7614	0.63576
10.7781	0.64283
10.7947	0.64978
10.8114	0.65661
10.8281	0.66332
10.8447	0.66992
10.8614	0.67651
10.8781	0.68311
10.8947	0.68966
10.9114	0.69609
10.9281	0.70245
10.9447	0.70881
10.9614	0.71505
10.9781	0.72105
10.9947	0.72694
11.0114	0.73283
11.0281	0.7386
11.0447	0.74413
11.0614	0.74943
11.0781	0.75461
11.0947	0.75967
11.1114	0.7645
11.1281	0.76921
11.1447	0.77369
11.1614	0.77781
11.1781	0.78182
11.1947	0.7857
11.2114	0.78936
11.2281	0.79289
11.2447	0.79631
11.2614	0.7995
11.2781	0.80257
11.2947	0.80552
11.3114	0.80824
11.3281	0.81084
11.3447	0.81333
11.3614	0.8157
11.3781	0.81796
11.3947	0.82011
11.4114	0.82214
11.4281	0.82407
11.4447	0.82599
11.4614	0.8278
11.4781	0.8294
11.4947	0.83089
11.5114	0.83239
11.5281	0.83388
11.5447	0.83537
11.5614	0.83676
11.5781	0.83805
11.5947	0.83924
11.6114	0.84033
11.6281	0.84142
11.6447	0.84251
11.6614	0.8436
11.6781	0.8447
11.6947	0.84579
11.7114	0.84688
11.7281	0.84797
11.7447	0.84907
11.7614	0.85016
11.7781	0.85125
11.7947	0.85234
11.8114	0.85343
11.8281	0.85453
11.8447	0.85552
11.8614	0.85642
11.8781	0.85732
11.8947	0.85822
11.9114	0.85912
11.9281	0.86002
11.9447	0.86102
11.9614	0.86201
11.9781	0.86291
11.9947	0.86381
12.0114	0.86471
12.0281	0.86561
12.0447	0.86661
12.0614	0.8676
12.0781	0.8685
12.0947	0.8694
12.1114	0.8703
12.1281	0.8712
12.1447	0.8721
12.1614	0.873
12.1781	0.8739
12.1947	0.8748
12.2114	0.8756
12.2281	0.87629
12.2447	0.87699
12.2614	0.87768
12.2781	0.87838
12.2947	0.87907
12.3114	0.87977
12.3281	0.88046
12.3447	0.88116
12.3614	0.88185
12.3781	0.88255
12.3947	0.88324
12.4114	0.88394
12.4281	0.88463
12.4447	0.88543
12.4614	0.88633
12.4781	0.88723
12.4947	0.88813
12.5114	0.88903
12.5281	0.88993
12.5447	0.89072
12.5614	0.89152
12.5781	0.89242
12.5947	0.89332
12.6114	0.89422
12.6281	0.89512
12.6447	0.89592
12.6614	0.89661
12.6781	0.89731
12.6947	0.89787
12.7114	0.89844
12.7281	0.89901
12.7447	0.89944
12.7614	0.89988
12.7781	0.90016
12.7947	0.90044
12.8114	0.90088
12.8281	0.90132
12.8447	0.90176
12.8614	0.90219
12.8781	0.90263
12.8947	0.90307
12.9114	0.90351
12.9281	0.90394
12.9447	0.90438
12.9614	0.90482
12.9781	0.90525
12.9947	0.90569
13.0114	0.90613
13.0281	0.90657
13.0447	0.907
13.0614	0.90744
13.0781	0.90788
13.0947	0.90832
13.1114	0.90875
13.1281	0.90919
13.1447	0.90963
13.1614	0.91007
13.1781	0.9105
13.1947	0.91094
13.2114	0.91138
13.2281	0.91182
13.2447	0.91225
13.2614	0.91269
13.2781	0.91313
13.2947	0.91356
13.3114	0.914
13.3281	0.91444
13.3447	0.91488
13.3614	0.91531
13.3781	0.91588
13.3947	0.91658
13.4114	0.91727
13.4281	0.91797
13.4447	0.91854
13.4614	0.91898
13.4781	0.91954
13.4947	0.92011
13.5114	0.92068
13.5281	0.92124
13.5447	0.92168
13.5614	0.92212
13.5781	0.92256
13.5947	0.92299
13.6114	0.92343
13.6281	0.92387
13.6447	0.92444
13.6614	0.92513
13.6781	0.92583
13.6947	0.92653
13.7114	0.92722
13.7281	0.92792
13.7447	0.92862
13.7614	0.92931
13.7781	0.93001
14.0358	0.92257
14.0503	0.90768
14.0595	0.90024
14.0667	0.8928
14.0822	0.8556
14.0975	0.8184
14.1136	0.7812
14.1286	0.74399
14.1442	0.70679
14.1608	0.66959
14.1775	0.63239
14.1944	0.59518
14.21	0.55798
14.2531	0.48358
14.2967	0.40917
14.3469	0.33477
14.4058	0.26036
14.4764	0.18596
14.5531	0.17108
14.5903	0.1562
14.6081	0.14876
14.6247	0.14792
14.6414	0.15095
14.6581	0.15727
14.6747	0.16242
14.6914	0.16827
14.7081	0.17471
14.7247	0.18162
14.7414	0.189
14.7581	0.19662
14.7747	0.20447
14.7914	0.21255
14.8081	0.22088
14.8247	0.22932
14.8414	0.23776
14.8581	0.24631
14.8747	0.25499
14.8914	0.26367
14.9081	0.27246
14.9247	0.28136
14.9414	0.29027
14.9581	0.29918
14.9747	0.30809
14.9914	0.317
15.0081	0.32591
15.0247	0.33482
15.0414	0.34372
15.0581	0.35263
15.0747	0.36154
15.0914	0.37045
15.1081	0.37936
15.1247	0.38827
15.1414	0.39717
15.1581	0.40608
15.1747	0.41499
15.1914	0.4239
15.2081	0.43281
15.2247	0.44172
15.2414	0.45062
15.2581	0.45953
15.2747	0.46833
15.2914	0.477
15.3081	0.48568
15.3247	0.49435
15.3414	0.50302
15.3581	0.5117
15.3747	0.52037
15.3914	0.52905
15.4081	0.53772
15.4247	0.5464
15.4414	0.55507
15.4581	0.56363
15.4747	0.57207
15.4914	0.58051
15.5081	0.58895
15.5247	0.59739
15.5414	0.60571
15.5581	0.61392
15.5747	0.62212
15.5914	0.63021
15.6081	0.63818
15.6247	0.64615
15.6414	0.65412
15.6581	0.66197
15.6747	0.66982
15.6914	0.67779
15.7081	0.68564
15.7247	0.69337
15.7414	0.70099
15.7581	0.70849
15.7747	0.71587
15.7914	0.72314
15.8081	0.7304
15.8247	0.73755
15.8414	0.74445
15.8581	0.75125
15.8747	0.75804
15.8914	0.76459
15.9081	0.77091
15.9247	0.77711
15.9414	0.7832
15.9581	0.78905
15.9747	0.79466
15.9914	0.80016
16.0081	0.80541
16.0247	0.81032
16.0414	0.815
16.0581	0.81956
16.0747	0.82388
16.0914	0.82797
16.1081	0.83182
16.1247	0.83532
16.1414	0.8386
16.1581	0.84175
16.1747	0.84468
16.1914	0.84739
16.2081	0.84998
16.2247	0.85235
16.2414	0.85451
16.2581	0.85657
16.2747	0.85852
16.2914	0.86048
16.3081	0.86243
16.3247	0.86429
16.3414	0.86605
16.3581	0.8678
16.3747	0.86947
16.3914	0.87103
16.4081	0.87249
16.4247	0.87396
16.4414	0.87552
16.4581	0.87709
16.4747	0.87855
16.4914	0.88001
16.5081	0.88158
16.5247	0.88314
16.5414	0.88461
16.5581	0.88597
16.5747	0.88733
16.5914	0.88856
16.6081	0.88966
16.6247	0.89076
16.6414	0.8917
16.6581	0.89265
16.6747	0.89375
16.6914	0.89485
16.7081	0.89595
16.7247	0.8969
16.7414	0.89784
16.7581	0.89894
16.7747	0.90004
16.7914	0.90099
16.8081	0.90178
16.8247	0.90257
16.8414	0.90336
16.8581	0.90415
16.8747	0.90495
16.8914	0.90574
16.9081	0.90639
16.9247	0.90703
16.9414	0.90768
16.9581	0.90819
16.9747	0.90869
16.9914	0.90919
17.0081	0.9097
17.0247	0.9102
17.0414	0.91071
17.0581	0.91121
17.0747	0.91172
17.0914	0.91222
17.1081	0.91273
17.1247	0.91323
17.1414	0.9136
17.1581	0.91398
17.1747	0.91448
17.1914	0.91499
17.2081	0.91549
17.2247	0.916
17.2414	0.9165
17.2581	0.917
17.2747	0.91765
17.2914	0.91844
17.3081	0.91909
17.3247	0.91959
17.3414	0.9201
17.3581	0.9206
17.3747	0.9211
17.3914	0.92161
17.4081	0.92226
17.4247	0.92304
17.4414	0.92383
17.4581	0.92462
17.4747	0.92541
17.4914	0.9262
17.5081	0.92699
17.5247	0.92778
17.5414	0.92842
17.5581	0.92907
17.5747	0.92985
17.5914	0.9308
17.6081	0.93203
17.6247	0.93349
17.6414	0.93515
17.6581	0.93691
17.6747	0.93867
17.6914	0.94033
17.7081	0.94199
17.7247	0.94405
17.7414	0.94621
17.7581	0.94827
17.7747	0.95042
17.7914	0.95248
17.8081	0.95424
17.8247	0.9557
17.8414	0.95693
17.8581	0.95773
17.8747	0.9581
17.8914	0.95834
17.9081	0.95857
17.9247	0.95857
17.9414	0.95843
17.9581	0.95842
17.9747	0.95841
17.9914	0.9584
18.0081	0.95827
18.0247	0.95814
18.0414	0.95825
18.0581	0.95837
18.0747	0.95836
18.0914	0.95822
18.1081	0.95809
18.1247	0.95808
18.1414	0.95807
18.1581	0.95805
18.3875	0.95061
18.4053	0.93572
18.4114	0.92828
18.423	0.92084
18.4508	0.88364
18.4667	0.84644
18.4811	0.80924
18.4975	0.77203
18.513	0.73483
18.5283	0.69763
18.5442	0.66043
18.5614	0.62322
18.5753	0.58602
18.615	0.51162
18.6553	0.43721
18.7022	0.36281
18.7572	0.2884
18.8219	0.214
18.8769	0.19912
18.8942	0.18424
18.9233	0.16936
18.9578	0.15447
18.9744	0.158
18.9911	0.16327
19.0078	0.16771
19.0244	0.17332
19.0411	0.17964
19.0578	0.18632
19.0744	0.19323
19.0911	0.20049
19.1078	0.20811
19.1244	0.21596
19.1411	0.22405
19.1578	0.23225
19.1744	0.24046
19.1911	0.24878
19.2078	0.25722
19.2244	0.26566
19.2411	0.2741
19.2578	0.28254
19.2744	0.29098
19.2911	0.29942
19.3078	0.30786
19.3244	0.31642
19.3411	0.32509
19.3578	0.33377
19.3744	0.34244
19.3911	0.35112
19.4078	0.3598
19.4244	0.36847
19.4411	0.37715
19.4578	0.38582
19.4744	0.3945
19.4911	0.40306
19.5078	0.41162
19.5244	0.42017
19.5411	0.42861
19.5578	0.43705
19.5744	0.44549
19.5911	0.45393
19.6078	0.46237
19.6244	0.47081
19.6411	0.47925
19.6578	0.48769
19.6744	0.49613
19.6911	0.50457
19.7078	0.51289
19.7244	0.5211
19.7411	0.5293
19.7578	0.53751
19.7744	0.54571
19.7911	0.55392
19.8078	0.56212
19.8244	0.57033
19.8411	0.57842
19.8578	0.58638
19.8744	0.59435
19.8911	0.6022
19.9078	0.60994
19.9244	0.61767
19.9411	0.62541
19.9578	0.63314
19.9744	0.64088
19.9911	0.64849
20.0078	0.65599
20.0244	0.66349
20.0411	0.67088
20.0578	0.67814
20.0744	0.6854
20.0911	0.69267
20.1078	0.69981
20.1244	0.70672
20.1411	0.71351
20.1578	0.7203
20.1744	0.72697
20.1911	0.73353
20.2078	0.73997
20.2244	0.74617
20.2411	0.75226
20.2578	0.75834
20.2744	0.76419
20.2911	0.76981
20.3078	0.77542
20.3244	0.78092
20.3411	0.78618
20.3578	0.7912
20.3744	0.79599
20.3911	0.80055
20.4078	0.80499
20.4244	0.80931
20.4411	0.81328
20.4578	0.81702
20.4744	0.82064
20.4911	0.82403
20.5078	0.82719
20.5244	0.83012
20.5411	0.83293
20.5578	0.83552
20.5744	0.83789
20.5911	0.84016
20.6078	0.84232
20.6244	0.84438
20.6411	0.84633
20.6578	0.84819
20.6744	0.84985
20.6911	0.85141
20.7078	0.85298
20.7244	0.85444
20.7411	0.8558
20.7578	0.85703
20.7744	0.85813
20.7911	0.85923
20.8078	0.86033
20.8244	0.86144
20.8411	0.86254
20.8578	0.86364
20.8744	0.86474
20.8911	0.86568
20.9078	0.86647
20.9244	0.86727
20.9411	0.86806
20.9578	0.86885
20.9744	0.8695
20.9911	0.87
21.0078	0.87065
21.0244	0.8713
21.0411	0.87195
21.0578	0.8726
21.0744	0.8731
21.0911	0.87361
21.1078	0.87412
21.1244	0.87462
21.1411	0.87513
21.1578	0.87564
21.1744	0.87614
21.1911	0.87665
21.2078	0.87716
21.2244	0.87766
21.2411	0.87804
21.2578	0.87829
21.2744	0.87853
21.2911	0.87878
21.3078	0.8789
21.3244	0.87902
21.3411	0.87927
21.3578	0.87952
21.3744	0.87976
21.3911	0.88001
21.4078	0.88026
21.4244	0.88051
21.4411	0.88075
21.4578	0.881
21.4744	0.88125
21.4911	0.88149
21.5078	0.88174
21.5244	0.88199
21.5411	0.88223
21.5578	0.88248
21.5744	0.88273
21.5911	0.88298
21.6078	0.88322
21.6244	0.88347
21.6411	0.88359
21.6578	0.88359
21.6744	0.88359
21.6911	0.88359
21.7078	0.88358
21.7244	0.88358
21.7411	0.8837
21.7578	0.88383
21.7744	0.88382
21.7911	0.88382
21.8078	0.8837
21.8244	0.88345
21.8411	0.88333
21.8578	0.88321
21.8744	0.88308
21.8911	0.88296
21.9078	0.88284
21.9244	0.88283
21.9411	0.88283
21.9578	0.88283
21.9744	0.88283
21.9911	0.88283
22.0078	0.88282
22.0244	0.88282
22.0411	0.88282
22.0578	0.88282
22.0744	0.88281
22.0911	0.88281
22.1078	0.88281
22.3867	0.87536
22.3939	0.86048
22.3994	0.85304
22.405	0.8456
22.4161	0.79352
22.4261	0.7712
22.443	0.734
22.4575	0.69679
22.4733	0.65959
22.4894	0.62239
22.5061	0.58519
22.523	0.54798
22.5383	0.51078
22.5858	0.43638
22.6314	0.36197
22.6867	0.28757
22.7547	0.21316
22.8439	0.13876
22.8672	0.12388
22.8942	0.109
22.9108	0.11287
22.9275	0.12051
22.9442	0.12755
22.9608	0.13412
22.9775	0.14081
22.9942	0.14797
23.0108	0.1556
23.0275	0.16347
23.0441	0.17157
23.0608	0.1799
23.0775	0.18847
23.0941	0.19716
23.1108	0.20597
23.1275	0.21489
23.1441	0.22381
23.1608	0.23285
23.1775	0.24201
23.1942	0.25117
23.2108	0.26033
23.2275	0.26948
23.2442	0.27864
23.2608	0.2878
23.2775	0.29696
23.2941	0.30611
23.3108	0.31527
23.3275	0.32443
23.3441	0.33359
23.3608	0.34274
23.3775	0.3519
23.3941	0.36106
23.4108	0.37022
23.4275	0.37937
23.4442	0.38853
23.4608	0.39769
23.4775	0.40684
23.4942	0.416
23.5108	0.42516
23.5275	0.43432
23.5441	0.44336
23.5608	0.45228
23.5775	0.4612
23.5941	0.47013
23.6108	0.47893
23.6275	0.48762
23.6441	0.49631
23.6608	0.505
23.6775	0.51369
23.6942	0.52226
23.7108	0.53071
23.7275	0.53917
23.7442	0.54762
23.7608	0.55596
23.7775	0.56417
23.7941	0.57239
23.8108	0.58049
23.8275	0.58848
23.8441	0.59646
23.8608	0.60433
23.8775	0.61207
23.8941	0.61971
23.9108	0.62722
23.9275	0.63461
23.9442	0.64189
23.9608	0.64905
23.9775	0.65609
23.9942	0.66301
24.0108	0.66981
24.0275	0.6765
24.0441	0.68295
24.0608	0.68917
24.0775	0.69527
24.0941	0.70125
24.1108	0.70699
24.1275	0.7125
24.1441	0.71778
24.1608	0.72282
24.1775	0.72762
24.1942	0.73219
24.2108	0.73653
24.2275	0.74075
24.2442	0.74474
24.2608	0.74838
24.2775	0.75178
24.2941	0.75496
24.3108	0.75803
24.3275	0.76109
24.3441	0.76404
24.3608	0.76677
24.3775	0.76928
24.3941	0.77168
24.4108	0.77398
24.4275	0.77608
24.4442	0.77807
24.4608	0.77996
24.4775	0.78175
24.4942	0.78354
24.5108	0.78533
24.5275	0.78702
24.5441	0.78859
24.5608	0.79016
24.5775	0.79161
24.5941	0.79291
24.6108	0.79422
24.6275	0.79539
24.6441	0.7964
24.6608	0.79741
24.6775	0.79843
24.6942	0.79944
24.7108	0.80045
24.7275	0.80133
24.7442	0.80221
24.7608	0.80308
24.7775	0.80382
24.7941	0.80456
24.8108	0.80531
24.8275	0.80604
24.8441	0.80678
24.8608	0.80752
24.8775	0.80826
24.8941	0.809
24.9108	0.80974
24.9275	0.81048
24.9442	0.81122
24.9608	0.8121
24.9775	0.81311
24.9942	0.81398
25.0108	0.81472
25.0275	0.81546
25.0441	0.81608
25.0608	0.81656
25.0775	0.81717
25.0941	0.81791
25.1108	0.81852
25.1275	0.81901
25.1441	0.8195
25.1608	0.82011
25.1775	0.82072
25.1942	0.82121
25.2108	0.82182
25.2275	0.82256
25.2442	0.8233
25.2608	0.82404
25.2775	0.82477
25.2941	0.82551
25.3108	0.82613
25.3275	0.82674
25.3441	0.82748
25.3608	0.82822
25.3775	0.82883
25.3941	0.82932
25.4108	0.8298
25.4275	0.83029
25.4442	0.83077
25.4608	0.83139
25.4775	0.832
25.4942	0.83249
25.5108	0.83297
25.5275	0.83346
25.5441	0.83394
25.5608	0.83443
25.5775	0.83491
25.5941	0.8354
25.6108	0.83588
25.6275	0.83649
25.6441	0.83711
25.6608	0.83759
25.6775	0.83808
25.6942	0.83856
25.7108	0.83905
25.7275	0.83953
25.7442	0.84002
25.7608	0.84051
25.7775	0.84099
25.7941	0.84148
25.8108	0.84196
25.8275	0.84245
25.8441	0.84293
25.8608	0.84354
25.8775	0.84416
25.8941	0.84477
25.9108	0.84538
25.9275	0.84587
25.9442	0.84623
25.9608	0.84659
25.9775	0.84708
25.9942	0.84744
26.0108	0.84768
26.0275	0.84792
26.0441	0.84828
26.0608	0.84876
26.0775	0.84925
26.0941	0.84974
26.1108	0.85022
26.1275	0.85071
26.4019	0.84326
26.4108	0.82838
26.4189	0.82094
26.4247	0.8135
26.4333	0.7763
26.4511	0.7391
26.4678	0.7019
26.4844	0.66469
26.5022	0.62749
26.5191	0.59029
26.5378	0.55309
26.5567	0.51588
26.5719	0.47868
26.6261	0.40428
26.6778	0.32987
26.743	0.25547
26.8283	0.18106
26.9119	0.12898
26.9278	0.12154
26.9453	0.1141
26.9639	0.10666
26.9639	0.10666
26.9805	0.1068
26.9972	0.10997
27.0139	0.11449
27.0305	0.11795
27.0472	0.12247
27.0639	0.12793
27.0805	0.13422
27.0972	0.14121
27.1139	0.14855
27.1305	0.15625
27.1472	0.16419
27.1639	0.17224
27.1805	0.1804
27.1972	0.18857
27.2139	0.19686
27.2305	0.20526
27.2472	0.21366
27.2639	0.22206
27.2805	0.23046
27.2972	0.23887
27.3139	0.24727
27.3305	0.25567
27.3472	0.26407
27.3639	0.27247
27.3805	0.28087
27.3972	0.28928
27.4139	0.29768
27.4305	0.30608
27.4472	0.31448
27.4639	0.32288
27.4805	0.33129
27.4972	0.33969
27.5139	0.34809
27.5305	0.35649
27.5472	0.36489
27.5639	0.3733
27.5805	0.3817
27.5972	0.3901
27.6139	0.3985
27.6305	0.4069
27.6472	0.41531
27.6639	0.42359
27.6805	0.43176
27.6972	0.43993
27.7139	0.44809
27.7305	0.45626
27.7472	0.46431
27.7639	0.47224
27.7805	0.48018
27.7972	0.48811
27.8139	0.49593
27.8305	0.50363
27.8472	0.51132
27.8639	0.51902
27.8805	0.5266
27.8972	0.53407
27.9139	0.54153
27.9305	0.54887
27.9472	0.5561
27.9639	0.56321
27.9805	0.57021
27.9972	0.57708
28.0139	0.58384
28.0305	0.59048
28.0472	0.59688
28.0639	0.60316
28.0805	0.60933
28.0972	0.61526
28.1139	0.62096
28.1305	0.62654
28.1472	0.632
28.1639	0.63722
28.1805	0.64233
28.1972	0.64732
28.2139	0.65196
28.2305	0.65636
28.2472	0.66065
28.2639	0.6647
28.2805	0.66852
28.2972	0.67222
28.3139	0.6758
28.3305	0.67915
28.3472	0.68238
28.3639	0.68561
28.3805	0.68872
28.3972	0.69161
28.4139	0.69437
28.4305	0.69691
28.4472	0.69922
28.4639	0.70141
28.4805	0.70328
28.4972	0.70493
28.5139	0.70657
28.5305	0.70822
28.5472	0.70987
28.5639	0.71141
28.5805	0.71274
28.5972	0.71408
28.6139	0.71541
28.6305	0.71665
28.6472	0.71788
28.6639	0.71911
28.6805	0.72024
28.6972	0.72127
28.7139	0.7223
28.7305	0.72333
28.7472	0.72436
28.7639	0.72528
28.7805	0.72609
28.7972	0.7269
28.8139	0.72782
28.8305	0.72885
28.8472	0.72977
28.8639	0.73058
28.8805	0.73139
28.8972	0.7322
28.9139	0.733
28.9305	0.73368
28.9472	0.73422
28.9639	0.73476
28.9805	0.7353
28.9972	0.73584
29.0139	0.73638
29.0305	0.73692
29.0472	0.73746
29.0639	0.73786
29.0805	0.73811
29.0972	0.73835
29.1139	0.7386
29.1305	0.73885
29.1472	0.7391
29.1639	0.73935
29.1805	0.7396
29.1972	0.73985
29.2139	0.74024
29.2305	0.74063
29.2472	0.74103
29.2639	0.74157
29.2805	0.74211
29.2972	0.74265
29.3139	0.74304
29.3305	0.74329
29.3472	0.74354
29.3639	0.74379
29.3805	0.74404
29.3972	0.74415
29.4139	0.74426
29.4305	0.74451
29.4472	0.74476
29.4639	0.74501
29.4805	0.74526
29.4972	0.74537
29.5139	0.74548
29.5305	0.74573
29.5472	0.74598
29.5639	0.74623
29.5805	0.74648
29.5972	0.74672
29.6139	0.74684
29.6305	0.74695
29.6472	0.7472
29.6639	0.74745
29.6805	0.7477
29.6972	0.74795
29.7139	0.7482
29.7305	0.74844
29.7472	0.74869
29.7639	0.74894
29.7805	0.74919
29.7972	0.74944
29.8139	0.74969
29.8305	0.74994
29.8472	0.75018
29.8639	0.75043
29.8805	0.75068
29.8972	0.75093
29.9139	0.75117
29.9305	0.75129
29.9472	0.7514
29.9639	0.75165
29.9805	0.75189
29.9972	0.75228
30.0139	0.75282
30.0305	0.75336
30.0472	0.7539
30.0639	0.75443
30.0805	0.7551
30.0972	0.75578
30.1139	0.75631
30.1305	0.75685
30.1472	0.75739
30.1639	0.75793
30.1805	0.75847
30.1972	0.75886
30.2139	0.75911
30.2305	0.75937
30.2472	0.75962
30.2639	0.75987
30.2805	0.76012
30.2972	0.76037
30.3139	0.76062
30.3305	0.76088
30.3472	0.76113
30.3639	0.76138
30.3805	0.76164
30.3972	0.76189
30.4139	0.76214
30.4305	0.7624
30.4472	0.76265
30.4639	0.76291
30.4805	0.76316
30.4972	0.76342
30.5139	0.76367
30.5305	0.76393
30.5472	0.76433
30.5639	0.76488
30.5805	0.76543
30.5972	0.76598
30.6139	0.76667
30.6305	0.76749
30.6472	0.76841
30.6639	0.76945
30.6805	0.77049
30.6972	0.77152
30.7139	0.77256
30.7305	0.7737
30.7472	0.77494
30.7639	0.77618
30.7805	0.77742
30.7972	0.77865
30.8139	0.78
30.8305	0.78144
31.0872	0.774
31.1028	0.75912
31.1105	0.75168
31.1194	0.74423
31.1366	0.70703
31.1528	0.66983
31.1694	0.63263
31.1836	0.59543
31.1986	0.55822
31.2186	0.52102
31.2372	0.48382
31.2569	0.44662
31.2761	0.40941
31.3389	0.33501
31.3989	0.2606
31.4739	0.1862
31.5625	0.12668
31.5972	0.11179
31.643	0.09691
31.6778	0.08947
31.6777	0.08947
31.6944	0.09371
31.7111	0.10119
31.7278	0.10759
31.7444	0.11399
31.7611	0.12075
31.7778	0.12812
31.7944	0.1361
31.8111	0.14443
31.8278	0.15302
31.8444	0.16184
31.8611	0.17079
31.8777	0.17986
31.8944	0.18904
31.9111	0.19834
31.9277	0.20778
31.9444	0.2172
31.9611	0.22663
31.9778	0.23606
31.9944	0.24549
32.0111	0.25491
32.0277	0.26435
32.0444	0.27377
32.0611	0.2832
32.0778	0.29262
32.0944	0.30205
32.1111	0.31148
32.1277	0.3209
32.1444	0.33021
32.1611	0.33945
32.1778	0.34883
32.1944	0.35813
32.2111	0.36732
32.2278	0.3765
32.2444	0.38569
32.2611	0.39488
32.2777	0.40394
32.2944	0.41288
32.3111	0.42183
32.3278	0.43077
32.3444	0.4396
32.3611	0.4483
32.3777	0.45701
32.3944	0.46559
32.4111	0.47405
32.4278	0.48251
32.4444	0.4908
32.4611	0.49886
32.4778	0.50684
32.4944	0.51469
32.5111	0.5223
32.5277	0.52966
32.5444	0.53679
32.5611	0.54367
32.5778	0.55032
32.5944	0.55671
32.6111	0.56287
32.6277	0.56878
32.6444	0.57445
32.6611	0.57988
32.6778	0.58507
32.6944	0.59001
32.7111	0.59471
32.7278	0.59918
32.7444	0.60339
32.7611	0.60738
32.7777	0.61123
32.7944	0.61486
32.8111	0.61812
32.8278	0.62116
32.8444	0.62396
32.8611	0.62665
32.8777	0.62923
32.8944	0.6317
32.9111	0.63396
32.9278	0.63601
32.9444	0.63806
32.9611	0.64002
32.9778	0.64187
32.9944	0.64361
33.0111	0.64525
33.0277	0.64689
33.0444	0.64838
33.0611	0.6496
33.0778	0.65066
33.0944	0.65172
33.1111	0.65264
33.1277	0.6534
33.1444	0.65417
33.1611	0.65494
33.1778	0.65571
33.1944	0.65648
33.2111	0.65712
33.2278	0.65762
33.2444	0.65813
33.2611	0.65876
33.2777	0.65953
33.2944	0.6603
33.3111	0.66107
33.3278	0.66184
33.3444	0.66261
33.3611	0.66338
33.3777	0.66402
33.3944	0.66452
33.4111	0.66503
33.4278	0.66553
33.4444	0.66604
33.4611	0.66641
33.4778	0.66666
33.4944	0.66691
33.5111	0.66716
33.5277	0.66741
33.5444	0.66765
33.5611	0.66803
33.5778	0.66854
33.5944	0.66892
33.6111	0.66917
33.6277	0.66941
33.6444	0.66966
33.6611	0.67004
33.6778	0.67055
33.6944	0.67105
33.7111	0.67156
33.7278	0.6722
33.7444	0.67283
33.7611	0.67346
33.7777	0.67423
33.7944	0.67501
33.8111	0.67577
33.8278	0.67654
33.8444	0.67706
33.8611	0.6773
33.8777	0.67755
33.8944	0.6778
33.9111	0.67805
33.9278	0.6783
33.9444	0.67855
33.9611	0.6788
33.9778	0.67917
33.9944	0.67967
34.0111	0.68018
34.0277	0.68068
34.0444	0.68119
34.0611	0.68157
34.0778	0.68182
34.0944	0.68206
34.1111	0.68231
34.1277	0.68269
34.1444	0.6832
34.1611	0.6837
34.1778	0.68421
34.1944	0.68483
34.2111	0.68561
34.2278	0.68638
34.2444	0.68715
34.2611	0.68791
34.2777	0.68855
34.2944	0.68906
34.3111	0.68956
34.3278	0.69019
34.3444	0.69111
34.3611	0.69202
34.3777	0.69279
34.3944	0.69356
34.4111	0.69433
34.5111	0.69356
34.5944	0.69202
34.8544	0.68458
34.8777	0.66226
34.8877	0.65482
34.9111	0.61762
34.9278	0.58042
34.945	0.54321
34.9641	0.50601
34.9847	0.46881
35.0044	0.43161
35.0244	0.3944
35.0475	0.3572
35.0703	0.32
35.14	0.24559
35.2158	0.17119
35.2705	0.13399
35.2958	0.11911
35.3319	0.10423
35.3586	0.09678
35.3805	0.08934
35.3805	0.08934
35.3972	0.09224
35.4139	0.09677
35.4305	0.10106
35.4472	0.10711
35.4639	0.1143
35.4805	0.12214
35.4972	0.13035
35.5139	0.13883
35.5305	0.14742
35.5472	0.15614
35.5639	0.16499
35.5805	0.17383
35.5972	0.18282
35.6139	0.19191
35.6305	0.20102
35.6472	0.21012
35.6639	0.21922
35.6805	0.22833
35.6972	0.23756
35.7139	0.24692
35.7305	0.25614
35.7472	0.26524
35.7639	0.27435
35.7805	0.28345
35.7972	0.29256
35.8139	0.30166
35.8305	0.31077
35.8472	0.31987
35.8639	0.32897
35.8805	0.33807
35.8972	0.34717
35.9139	0.35628
35.9305	0.36538
35.9472	0.37449
35.9639	0.38359
35.9805	0.39256
35.9972	0.40141
36.0139	0.41026
36.0305	0.41911
36.0472	0.42796
36.0639	0.4368
36.0805	0.44553
36.0972	0.45412
36.1139	0.46259
36.1305	0.47093
36.1472	0.47927
36.1639	0.4876
36.1805	0.49582
36.1972	0.5039
36.2139	0.51186
36.2305	0.5197
36.2472	0.5274
36.2639	0.53485
36.2805	0.54218
36.2972	0.54937
36.3139	0.55631
36.3305	0.56313
36.3472	0.56981
36.3639	0.57612
36.3805	0.58217
36.3972	0.58797
36.4139	0.59338
36.4305	0.59867
36.4472	0.60395
36.4639	0.60912
36.4805	0.61403
36.4972	0.61881
36.5139	0.62347
36.5305	0.62799
36.5472	0.6324
36.5639	0.63655
36.5805	0.64058
36.5972	0.64435
36.6139	0.64787
36.6305	0.65113
36.6472	0.65415
36.6639	0.65705
36.6805	0.6597
36.6972	0.662
36.7139	0.66396
36.7305	0.66569
36.7472	0.66742
36.7639	0.66916
36.7805	0.67069
36.7972	0.6721
36.8139	0.67352
36.8305	0.67494
36.8472	0.67636
36.8639	0.67751
36.8805	0.67867
36.8972	0.68009
36.9139	0.68151
36.9305	0.68292
36.9472	0.68434
36.9639	0.68563
36.9805	0.68682
36.9972	0.68801
37.0139	0.68906
37.0305	0.68979
37.0472	0.69036
37.0639	0.69094
37.0805	0.69151
37.0972	0.69193
37.1139	0.69235
37.1305	0.69292
37.1472	0.6935
37.1639	0.69407
37.1805	0.69464
37.1972	0.69506
37.2139	0.69548
37.2305	0.6959
37.2472	0.69617
37.2639	0.69644
[truncated: 49 more rows]

## Sheet: Fig. 3d
Desorption time (min)	CO2 purity (%)		Desorption time (min)	Product volume (mL)	Desorption time (min)	Product volume (mL)	Desorption time (min)	Product volume (mL)	Desorption time (min)	Product volume (mL)	Desorption time (min)	Product volume (mL)
0	0.55		6	10	8.91667	10	7.01667	10	6.91667	10	4.78333	10
0.33333	0.3		8.66667	30	10.5	30	9.68333	30	9.53333	30	8	30
0.66667	0.1		10.8333	50	12.15	50	11.7667	50	11.5833	50	10.2333	50
1	0.3		12.5167	70	13.5833	70	13.35	70	13.2333	70	11.95	70
1.33333	0.3		13.9333	90	14.7833	90	14.6333	90	14.5333	90	13.3667	90
1.66667	0.3		15.6833	120	16.3167	120	16.2167	120	16.2333	120	15.15	120
2	0.1		17.1833	150	17.5667	150	17.5833	150	17.5333	150	16.6833	150
2.33333	0.3		19.0833	200	18.9667	200	19.0833	200	18.9667	200	18.6167	200
2.66667	0.3		20.2	250	19.7667	250	20	250	19.8167	250	19.8667	250
3	0.35		21.0333	300	20.4667	300	20.75	300	20.4833	300	20.6167	300
3.33333	0.3		21.65	350	21.1	350	21.35	350	21.0667	350	21.25	350
3.66667	0.1		22.3	400	21.6833	400	21.95	400	21.6167	400	21.8167	400
4	0.3		22.8	450	22.2	450	22.45	450	22.1	450	22.3167	450
4.33333	0.3		23.65	500	23.05	500	23.4833	500	23.2667	500	23.3667	500
4.66667	0.3		24.5333	600	23.7833	600	24.2333	600	23.9333	600	24.0167	600
5	0.25		25.3	700	24.4667	700	24.9167	700	24.5833	700	24.8	700
5.33333	0.3		25.95	800	25.1167	800	25.65	800	25.2667	800	25.5333	800
5.66667	0.3		26.5167	900	25.6833	900	26.25	900	25.8667	900	26.2333	900
6	0.1		27.2667	1000	26.5	1000	27.2167	1000	26.8833	1000	27.1167	1000
6.33333	0.3		27.8333	1100	27.0333	1100	27.8	1100	27.4333	1100	27.9667	1100
6.66667	0.1		28.45	1200	27.6333	1200	28.3833	1200	28.1667	1200	28.8833	1200
7	0.3		29.2	1300	28.4333	1300	29.0333	1300	29.2	1300	30.0167	1300
7.33333	0.3		30.3	1400	29.5333	1400	29.8667	1400	30.6667	1400	31.5167	1400
7.66667	0.1		32.5167	1500	31.6167	1500	31.7667	1500	36	1500	33.5833	1500
8	0.3		34.55	1550	32.9667	1550	32.85	1550	37.4667	1520	35.15	1550
8.33333	0.3		36.2	1570	34.4833	1580	33.5	1580	39.3	1540	36.0333	1570
8.66667	0.3		37.25	1580	35.2167	1590	34.1333	1600	41.1833	1550	37.2167	1590
9	0.2				36.15	1600	35.55	1630			37.85	1600
9.33333	0.15						36.25	1640			38.7	1610
9.66667	0.3						37	1650
10	0.2
10.3333	0.3
10.6667	0.3
11	0.3
11.3333	0.1
11.6667	0.3
12	0.1
12.3333	0.3
12.6667	0.3
13	0.1
13.3333	0.1
13.6667	0.3
14	0.4
14.3333	0.85
14.6667	0.65
15	0.8
15.3333	1.05
15.6667	1.75
16	2.2
16.3333	3.2
16.6667	4.8
17	6.35
17.3333	8.4
17.6667	8.95
18	17.2
18.3333	26.65
18.6667	38.05
19	51.4
19.3333	64.95
19.6667	78.75
20	87.85
20.3333	93.3
20.6667	96.45
21	98.75
21.3333	99.55
21.6667	99.6
22	99.65
22.3333	99.7
22.6667	99.7
23	99.7
23.3333	99.55
23.6667	99.5
24	99.65
24.3333	99.55
24.6667	99.5
25	99.65
25.3333	99.6
25.6667	99.5
26	99.5
26.3333	99.5
26.6667	99.25
27	99.6
27.3333	99.3
27.6667	99.4
28	99.4
28.3333	99.5
28.6667	99.5
29	99.6
29.3333	99.35
29.6667	99.3
30	99.5
30.3333	99.5
30.6667	99.55
31	99.35
31.3333	99.5
31.6667	99.25
32	99.45
32.3333	99.5
32.6667	99.45
33	99.45
33.3333	99.35
33.6667	99.55
34	99.4
34.3333	99.15
34.6667	100
35	100
35.3333	99.7
35.6667	99.55
36	99.4
36.3333	99.65
36.6667	99.45
37	99.4
37.3333	99.4
37.6667	99.5
38	99.5
38.3333	99.45
38.6667	99.4
39	99.45
39.3333	99.5
39.6667	99.45
40	99.35

## Sheet: Fig. 3e
	Desorption with vapor purge	Desorption without vapor purge
Cycle number	Cyclic capacity (mmol g-1)
1	0.9126	0.96726
2	1.01648	0.81845
3	0.96154	0.78125
4	0.99588	0.80357
5	0.9272	0.77381
6	0.96841	0.74405
7	0.99588	0.69196
8	0.98214	0.60268
9	0.97527	0.63244

[truncated: 27 more sheets: Fig. 3f, Fig. 3g, Fig. 4a, Fig. 4b, Fig. 4c, Fig. 4e, Fig. 4f, Fig. 5c, Fig. 5d, Fig. 6a, Fig. 6b, Fig. 6c, Fig. 6d, Fig. 6e, Supplementary Fig. 1, Supplementary Fig. 2, Supplementary Fig. 4, Supplementary Fig. 5, Supplementary Fig. 6, Supplementary Fig. 7 …]
